# Supplementary material for: Unravelling the molecular mechanism underlying drought stress response in chickpea via integrated multi-omics analysis
Source: Front Plant Sci. 2023 May 23;14:1156606. doi: 10.3389/fpls.2023.1156606 (PMC10242046; doi:10.3389/fpls.2023.1156606)
Supplement: Supplementary file 4 [file Table_3.xlsx]

## Sheet: DEGs
Table S3. Summary of differentially abundant transcripts (DATs) in drought-tolerant (DT) and drought-sensitive (DS) chickpea genotypes under control (C) and drought stress (D) conditions. DATs in the DT and DS genotypes are identified under drought stress (D) as compared to control (C), DT(D/C) and DS(D/C), respectively, and between DT and DS genotypes under control condition [DT(C)/DS(C)].
DT(D/C)-UP				DT(D/C)-DOWN				DS(D/C)-UP				DS(D/C)-DOWN				DT(C)/DS(C)-UP				DT(C)/DS(C)-DOWN
Test-IDs	genes	log2(fold change)	p-value	Test-IDs	genes	log2(fold change)	p-value	Test-IDs	genes	log2(fold change)	p-value	Test-IDs	genes	log2(fold change)	p-value	Test-IDs	genes	log2(fold change)	p-value	Test-IDs	genes	log2(fold change)	p-value
XLOC_000008	-	16.297	5e-05	XLOC_014047	Ca_11375	-14.4341	0.01145	XLOC_000008	-	17.7003	5e-05	XLOC_002483	Ca_14115	-16.0231	5e-05	XLOC_008865	-	16.555	5e-05	XLOC_016034	-	-16.0109	5e-05
XLOC_024088	Ca_02073	14.2275	0.0037	XLOC_005906	-	-14.0322	0.00265	XLOC_003468	-	16.0591	5e-05	XLOC_006150	Ca_20658	-15.4049	5e-05	XLOC_003468	-	15.2044	0.0006	XLOC_025342	-	-15.7312	5e-05
XLOC_005900	-	12.8557	0.00185	XLOC_005671	-	-13.6683	0.0137	XLOC_028397	-	15.7036	0.00035	XLOC_001032	Ca_06924	-14.4836	5e-05	XLOC_012679	-	13.9562	5e-05	XLOC_020182	-	-15.1604	0.0017
XLOC_016088	-	12.7717	0.00025	XLOC_006032	-	-13.4147	0.042	XLOC_016054	-	14.9928	5e-05	XLOC_015420	-	-14.391	5e-05	XLOC_016169	-	13.7425	0.00205	XLOC_023696	-	-15.0468	0.0004
XLOC_005247	Ca_24651	12.3866	0.02575	XLOC_023604	-	-13.3775	5e-05	XLOC_030121	Ca_25615	14.1421	0.0013	XLOC_027799	-	-13.7588	0.0004	XLOC_026046	-	13.6477	5e-05	XLOC_022906	-	-14.7383	0.00035
XLOC_013616	Ca_01891	12.2033	0.04705	XLOC_025924	-	-13.0361	5e-05	XLOC_028243	-	14.0187	0.00815	XLOC_030919	-	-13.2384	5e-05	XLOC_008930	-	13.2286	0.0001	XLOC_003328	-	-14.5851	5e-05
XLOC_005859	Ca_09780	11.9138	0.0149	XLOC_027461	-	-12.6391	0.0001	XLOC_020225	-	13.6627	0.00155	XLOC_028610	-	-13.2246	5e-05	XLOC_025220	Ca_13026	13.1904	5e-05	XLOC_005265	Ca_24767	-13.9891	5e-05
XLOC_018481	Ca_09674	11.8158	0.0025	XLOC_027799	-	-12.2752	0.0062	XLOC_002558	Ca_07030	13.2154	0.02335	XLOC_030290	Ca_27665	-12.8863	0.03065	XLOC_017865	Ca_13477	13.0619	0.03145	XLOC_025672	Ca_24272	-13.9522	0.0051
XLOC_016249	Ca_13304	11.6461	0.03985	XLOC_023734	-	-12.1229	0.00015	XLOC_015124	Ca_04734	12.4073	0.00035	XLOC_023081	Ca_11701	-12.4381	0.00165	XLOC_003561	-	12.7935	5e-05	XLOC_008938	-	-13.8484	0.0002
XLOC_017691	Ca_21938	11.6324	0.0206	XLOC_016205	-	-12.0558	0.0001	XLOC_017628	Ca_19554	12.3454	5e-05	XLOC_023604	-	-12.4067	0.00085	XLOC_012452	Ca_18363	12.7541	0.02995	XLOC_026744	-	-13.7164	5e-05
XLOC_019833	Ca_13450	11.3734	5e-05	XLOC_020317	-	-11.9404	5e-05	XLOC_030341	Ca_25841	12.3418	0.00195	XLOC_021923	Ca_19486	-12.1938	0.0348	XLOC_021137	Ca_09902	12.7409	0.00425	XLOC_004993	Ca_19149	-13.2676	0.04585
XLOC_018033	-	11.3632	0.0001	XLOC_012697	-	-11.9239	0.0005	XLOC_005901	-	12.3195	0.00045	XLOC_010776	Ca_23008	-11.9966	0.02035	XLOC_006006	-	12.4918	5e-05	XLOC_026715	-	-13.1373	5e-05
XLOC_013111	Ca_23513	11.1686	0.00155	XLOC_023341	-	-11.9155	0.0137	XLOC_018143	Ca_18854	12.3049	0.0412	XLOC_008991	-	-11.9221	5e-05	XLOC_017628	Ca_19554	12.3761	5e-05	XLOC_027218	-	-13.0522	5e-05
XLOC_016525	Ca_16903	10.9886	5e-05	XLOC_001032	Ca_06924	-11.8842	0.00075	XLOC_030061	Ca_26836	12.0905	0.0222	XLOC_017941	-	-11.8063	0.0019	XLOC_023613	-	12.1732	0.0007	XLOC_025532	-	-13.0124	0.00035
XLOC_009016	-	10.7991	0.0005	XLOC_016204	-	-11.8807	0.00045	XLOC_012252	Ca_14871	11.9672	0.0412	XLOC_005977	-	-11.6819	0.0001	XLOC_023734	-	12.0084	0.00135	XLOC_003410	-	-13.0028	0.0037
XLOC_003558	-	10.7397	0.0028	XLOC_026249	-	-11.8733	5e-05	XLOC_028281	Ca_28109	11.8665	0.00035	XLOC_030106	-	-11.6717	0.00355	XLOC_027273	Ca_26324	11.9723	5e-05	XLOC_020693	Ca_06747	-12.8938	0.0321
XLOC_009331	Ca_03594	10.7289	0.02035	XLOC_017891	Ca_19195	-11.617	0.0115	XLOC_009961	Ca_17120	11.7596	0.0021	XLOC_012654	-	-11.6375	5e-05	XLOC_005916	-	11.9324	0.00055	XLOC_020188	-	-12.5884	0.0004
XLOC_023254	Ca_17635	10.617	0.0149	XLOC_006118	Ca_22382	-11.5426	0.0137	XLOC_026788	-	11.6394	0.00015	XLOC_005923	-	-11.4876	5e-05	XLOC_026477	Ca_27083	11.8744	5e-05	XLOC_025148	Ca_23847	-12.5366	0.0002
XLOC_013555	Ca_04937	10.5757	0.02035	XLOC_000010	-	-11.4722	5e-05	XLOC_010463	Ca_14890	11.5663	0.0014	XLOC_002108	Ca_07900	-11.3456	0.0038	XLOC_012697	-	11.8092	0.00205	XLOC_008992	-	-12.5111	5e-05
XLOC_012337	Ca_23681	10.5672	0.02575	XLOC_008958	-	-10.8118	0.00195	XLOC_018983	Ca_06405	11.5595	0.0412	XLOC_003563	-	-11.331	5e-05	XLOC_003552	-	11.7968	0.0001	XLOC_020321	-	-12.4725	0.00135
XLOC_010558	Ca_23687	10.5286	0.02575	XLOC_019744	Ca_17730	-10.7642	0.02385	XLOC_001231	-	11.5124	0.00405	XLOC_012704	-	-11.2766	0.02035	XLOC_016204	-	11.766	0.0011	XLOC_023081	Ca_11701	-12.3626	0.0014
XLOC_025565	Ca_17206	10.2367	0.02575	XLOC_009587	Ca_04407	-10.7117	5e-05	XLOC_012201	-	11.4544	0.00135	XLOC_009006	-	-11.229	0.00585	XLOC_017457	Ca_25977	11.5757	0.011	XLOC_010558	Ca_23687	-12.0339	0.0023
XLOC_015127	Ca_04737	10.1935	0.0462	XLOC_026921	Ca_26047	-10.7112	0.00195	XLOC_005929	-	11.4257	0.00335	XLOC_030216	Ca_23817	-11.2179	0.00965	XLOC_015124	Ca_04734	11.5409	0.00665	XLOC_020183	-	-11.886	0.00175
XLOC_001341	Ca_26747	10.1055	0.00795	XLOC_029819	Ca_25343	-10.6241	0.0062	XLOC_026786	-	11.3312	0.0024	XLOC_007607	Ca_23727	-11.1095	0.0398	XLOC_023781	-	11.5306	0.0013	XLOC_013555	Ca_04937	-11.7266	0.01265
XLOC_009493	Ca_08450	10.0632	0.0025	XLOC_014679	Ca_21635	-10.2803	0.001	XLOC_006748	Ca_08264	11.2929	0.0127	XLOC_002197	Ca_08098	-11.023	0.00585	XLOC_017891	Ca_19195	11.5021	0.02285	XLOC_008654	Ca_00989	-11.698	5e-05
XLOC_029504	Ca_27188	9.96026	0.0094	XLOC_027545	Ca_24893	-10.218	0.0115	XLOC_008917	-	11.1905	5e-05	XLOC_012705	-	-10.9917	0.03065	XLOC_026179	-	11.4609	0.0045	XLOC_005923	-	-11.4143	5e-05
XLOC_027677	-	9.94238	0.0094	XLOC_030789	Ca_25670	-5.61366	5e-05	XLOC_023442	Ca_17998	11.1171	0.0324	XLOC_021582	Ca_10011	-10.6457	5e-05	XLOC_010463	Ca_14890	11.3931	0.0013	XLOC_012663	-	-11.2293	0.0017
XLOC_007102	Ca_00712	9.92509	5e-05	XLOC_012370	-	-5.56401	0.00495	XLOC_028021	-	11.1164	5e-05	XLOC_010206	Ca_14201	-10.5907	0.01735	XLOC_006215	-	11.3715	0.0011	XLOC_016031	-	-11.1963	0.00475
XLOC_020368	-	9.79458	0.02575	XLOC_026795	-	-5.51499	0.0041	XLOC_017457	Ca_25977	11.072	0.0222	XLOC_008469	Ca_12056	-10.5731	0.0076	XLOC_018643	Ca_08561	11.3584	0.0001	XLOC_003527	-	-11.1527	5e-05
XLOC_015837	Ca_03934	5.18215	0.02605	XLOC_020946	Ca_09377	-5.24692	0.00015	XLOC_020391	Ca_24415	11.045	0.0127	XLOC_008572	Ca_00845	-10.5706	0.00035	XLOC_020208	-	11.2893	5e-05	XLOC_000092	-	-11.1224	0.04945
XLOC_024520	Ca_17879	4.10319	5e-05	XLOC_001984	-	-5.18145	0.01865	XLOC_017891	Ca_19195	10.9685	0.0411	XLOC_001977	Ca_00479	-10.4685	0.0038	XLOC_003388	-	11.2703	0.00055	XLOC_013475	Ca_04779	-11.0961	0.0434
XLOC_003331	Ca_25110	4.07599	0.00395	XLOC_026236	Ca_22597	-5.1619	5e-05	XLOC_027482	-	10.9543	0.0038	XLOC_026828	Ca_26995	-10.397	0.0038	XLOC_023758	-	11.2679	0.0007	XLOC_009331	Ca_03594	-11.0458	0.0259
XLOC_004944	Ca_14665	3.74557	0.0005	XLOC_002254	Ca_02836	-5.11745	5e-05	XLOC_028110	Ca_20584	10.9529	0.0222	XLOC_023805	Ca_11903	-10.3876	0.007	XLOC_002614	Ca_06925	11.2541	0.018	XLOC_015127	Ca_04737	-10.8557	0.0321
XLOC_008413	-	3.58152	0.02615	XLOC_025974	-	-5.09313	0.02885	XLOC_009106	Ca_07824	10.8834	0.017	XLOC_023873	Ca_15059	-10.356	0.014	XLOC_017579	-	11.2305	5e-05	XLOC_009016	-	-10.7316	0.0016
XLOC_000619	Ca_08076	3.55306	0.0031	XLOC_012153	Ca_15134	-5.06535	5e-05	XLOC_012630	-	10.7657	5e-05	XLOC_016545	Ca_16941	-10.3551	5e-05	XLOC_003536	-	11.2303	5e-05	XLOC_020199	-	-10.7012	5e-05
XLOC_017716	Ca_24862	3.5161	5e-05	XLOC_006771	Ca_08229	-5.00382	5e-05	XLOC_012631	-	10.6792	5e-05	XLOC_026905	Ca_26678	-10.3451	0.02035	XLOC_019344	Ca_26117	11.1868	0.03955	XLOC_019868	Ca_17511	-10.6157	0.0438
XLOC_020328	-	3.39034	0.00715	XLOC_003498	-	-4.94234	5e-05	XLOC_004150	Ca_25225	10.6162	0.0412	XLOC_011745	Ca_13999	-10.3197	0.014	XLOC_008869	-	11.1672	0.00045	XLOC_003396	-	-10.5299	0.0001
XLOC_010920	-	3.21486	5e-05	XLOC_024917	Ca_10732	-4.83559	5e-05	XLOC_024107	Ca_02042	10.5948	0.0412	XLOC_020329	-	-10.3188	0.02035	XLOC_008868	-	11.1578	0.00205	XLOC_021032	Ca_09224	-10.4765	0.0126
XLOC_001983	Ca_00488	3.18886	0.00075	XLOC_013701	Ca_01713	-4.80282	5e-05	XLOC_005916	-	10.5281	0.017	XLOC_029787	-	-10.2078	0.00115	XLOC_006000	-	11.1427	0.02615	XLOC_020368	-	-10.3983	0.02125
XLOC_013486	Ca_04795	3.18621	0.0083	XLOC_024630	Ca_15064	-4.80242	0.00055	XLOC_030521	-	10.5052	0.00215	XLOC_028410	Ca_24185	-10.0808	0.001	XLOC_013161	Ca_24466	11.1323	5e-05	XLOC_005641	Ca_12451	-10.3807	0.0003
XLOC_006573	Ca_20406	3.06449	0.01225	XLOC_022058	Ca_03260	-4.78239	5e-05	XLOC_009926	Ca_13997	10.4735	0.0127	XLOC_007027	Ca_12296	-9.73742	0.014	XLOC_023759	-	11.0971	0.00065	XLOC_026905	Ca_26678	-10.278	0.0321
XLOC_011433	Ca_04473	3.01067	0.0001	XLOC_007911	Ca_09495	-4.74721	5e-05	XLOC_017753	Ca_13838	10.3564	0.0222	XLOC_015041	Ca_13360	-7.30962	0.0105	XLOC_019347	Ca_25961	10.9847	5e-05	XLOC_003528	-	-10.2656	0.01865
XLOC_024344	Ca_18426	2.9107	0.0051	XLOC_015846	Ca_03952	-4.73704	5e-05	XLOC_015187	Ca_04846	10.3278	0.0411	XLOC_024547	Ca_15539	-6.89967	5e-05	XLOC_012785	Ca_18674	10.8771	0.0013	XLOC_016664	Ca_16734	-10.0486	0.00765
XLOC_023350	Ca_16397	2.90054	0.0081	XLOC_022059	Ca_03259	-4.72898	5e-05	XLOC_014421	Ca_26507	10.2138	0.0412	XLOC_028602	Ca_24721	-6.86162	0.0425	XLOC_016082	-	10.8699	5e-05	XLOC_000864	Ca_02492	-9.89855	0.0321
XLOC_006516	Ca_09449	2.84209	5e-05	XLOC_013718	Ca_01683	-4.71426	5e-05	XLOC_018154	Ca_13245	10.19	0.0008	XLOC_022330	Ca_06646	-6.7117	0.0014	XLOC_005959	-	10.8058	0.0013	XLOC_007149	Ca_00794	-9.87974	0.0037
XLOC_018570	Ca_16738	2.81159	5e-05	XLOC_015939	Ca_04141	-4.68307	0.00015	XLOC_023502	Ca_15709	10.114	0.0222	XLOC_023225	Ca_16199	-6.39025	0.0003	XLOC_021893	Ca_15732	10.7063	0.02855	XLOC_020196	-	-7.63044	0.01525
XLOC_007862	Ca_19354	2.79303	5e-05	XLOC_028292	Ca_25899	-4.6614	0.04775	XLOC_025658	Ca_27869	10.0299	5e-05	XLOC_019741	Ca_17734	-5.48777	0.03315	XLOC_008958	-	10.6972	0.02465	XLOC_030722	-	-6.04359	0.0144
XLOC_024302	Ca_11528	2.76599	0.00355	XLOC_018606	Ca_08630	-4.66106	0.00475	XLOC_020478	Ca_03257	10.0241	0.017	XLOC_025336	-	-5.40665	0.0004	XLOC_019293	-	10.5733	5e-05	XLOC_024310	Ca_11543	-5.72569	0.00055
XLOC_024699	Ca_02358	2.63874	5e-05	XLOC_004045	Ca_11637	-4.65443	5e-05	XLOC_030328	-	9.98695	0.017	XLOC_020750	Ca_06646	-5.24135	0.0065	XLOC_023610	-	10.5313	5e-05	XLOC_026731	Ca_21085	-5.24299	5e-05
XLOC_016556	Ca_09683	2.63194	0.0034	XLOC_017810	-	-4.64323	0.0016	XLOC_029509	Ca_22389	9.96836	0.0222	XLOC_001041	Ca_06909	-5.07837	0.0023	XLOC_003081	Ca_26098	10.4834	0.0013	XLOC_020184	-	-5.13236	0.037
XLOC_029250	-	2.62851	0.00015	XLOC_020542	Ca_03133	-4.60104	5e-05	XLOC_028071	Ca_26643	9.88272	0.00015	XLOC_017566	Ca_22054	-4.90313	0.0137	XLOC_023611	-	10.4173	0.0021	XLOC_010413	-	-4.92734	0.0144
XLOC_004912	Ca_21097	2.61102	0.0002	XLOC_022057	Ca_03261	-4.59842	0.0005	XLOC_003388	-	9.83167	0.0127	XLOC_013718	Ca_01683	-4.87564	0.00485	XLOC_003458	-	10.379	5e-05	XLOC_004980	Ca_20930	-4.68388	5e-05
XLOC_017440	Ca_17474	2.60704	5e-05	XLOC_014275	Ca_04097	-4.54938	5e-05	XLOC_029332	Ca_26868	9.82402	0.0411	XLOC_018998	Ca_06446	-4.7776	5e-05	XLOC_020397	Ca_03407	10.3461	0.01875	XLOC_027328	-	-4.60573	0.01255
XLOC_023568	Ca_22539	2.58464	5e-05	XLOC_003488	-	-4.52286	5e-05	XLOC_001306	Ca_18299	9.81314	0.0166	XLOC_016563	Ca_09664	-4.7388	5e-05	XLOC_026665	-	10.2902	0.04005	XLOC_020072	Ca_13632	-4.49524	0.0003
XLOC_012604	-	2.53384	0.002	XLOC_027355	-	-4.52055	5e-05	XLOC_029419	Ca_24563	9.78481	0.00075	XLOC_002835	Ca_19295,Ca_19297	-4.70204	0.00275	XLOC_023615	-	10.2738	0.00035	XLOC_008161	Ca_08213	-4.36697	5e-05
XLOC_023430	-	2.52018	0.03425	XLOC_023945	Ca_02348	-4.50586	0.0027	XLOC_028537	Ca_21285	4.20398	0.0417	XLOC_020749	Ca_06647	-4.5879	0.0001	XLOC_026664	-	10.2556	0.01875	XLOC_015420	-	-4.3581	0.00025
XLOC_020163	-	2.50655	0.0001	XLOC_003193	-	-4.50358	5e-05	XLOC_011433	Ca_04473	4.02774	0.0032	XLOC_020903	Ca_12780	-4.54297	5e-05	XLOC_016081	-	10.241	5e-05	XLOC_014513	-	-4.3332	0.01255
XLOC_024696	Ca_02363	2.49215	0.0013	XLOC_007179	Ca_00861	-4.47981	5e-05	XLOC_003331	Ca_25110	3.78992	0.00515	XLOC_007086	Ca_20876	-4.43353	0.0412	XLOC_005950	-	10.1596	0.00175	XLOC_015041	Ca_13360	-4.14193	5e-05
XLOC_016109	-	2.49212	0.00435	XLOC_005969	-	-4.46863	0.00015	XLOC_008894	-	3.61599	0.02895	XLOC_003498	-	-4.42618	0.0002	XLOC_012630	-	10.1092	0.0009	XLOC_024156	Ca_01960	-3.94548	5e-05
XLOC_016402	Ca_05883	2.47619	5e-05	XLOC_008571	Ca_00844	-4.44214	5e-05	XLOC_015837	Ca_03934	3.53545	0.00695	XLOC_009538	Ca_04304	-4.32652	5e-05	XLOC_003919	Ca_20024	10.1018	0.0003	XLOC_025327	-	-3.73212	0.0023
XLOC_006739	Ca_08277	2.46731	0.0337	XLOC_014276	Ca_04100	-4.41992	5e-05	XLOC_000619	Ca_08076	3.39354	0.0226	XLOC_020068	Ca_13637	-4.15181	5e-05	XLOC_023612	-	10.0426	0.00015	XLOC_029866	-	-3.61398	0.00915
XLOC_002160	Ca_08017	2.46448	0.00185	XLOC_020319	-	-4.41473	5e-05	XLOC_028079	-	3.37779	0.04185	XLOC_015025	Ca_13380	-4.10887	5e-05	XLOC_021151	Ca_09871	9.78582	0.03955	XLOC_027324	-	-3.59428	0.02175
XLOC_024964	Ca_10642	2.46189	5e-05	XLOC_017496	Ca_15160	-4.40564	0.00145	XLOC_004944	Ca_14665	3.3124	0.00105	XLOC_008299	Ca_07290	-4.09935	5e-05	XLOC_029597	-	6.75105	0.02415	XLOC_020186	-	-3.53132	0.00645
XLOC_009314	Ca_03626	2.42624	0.0013	XLOC_016442	Ca_05815	-4.33924	5e-05	XLOC_027487	-	3.3003	0.0351	XLOC_006780	Ca_08205	-3.99582	5e-05	XLOC_026234	-	6.22385	0.02	XLOC_011987	Ca_14184	-3.52114	5e-05
XLOC_020326	-	2.40406	0.0047	XLOC_019517	Ca_15786	-4.33551	0.0003	XLOC_012625	-	3.25231	0.03675	XLOC_019133	Ca_11259	-3.93417	0.0141	XLOC_024046	-	6.21847	0.00115	XLOC_002483	Ca_14115	-3.40752	0.0101
XLOC_005946	-	2.40255	0.01265	XLOC_018520	Ca_09591	-4.33212	0.0009	XLOC_010571	Ca_09065	3.08764	0.0031	XLOC_005961	-	-3.92782	5e-05	XLOC_003149	Ca_13939	6.18318	0.04735	XLOC_028602	Ca_24721	-3.40059	0.00045
XLOC_005032	Ca_18147	2.39677	0.02045	XLOC_005225	-	-4.31036	5e-05	XLOC_016123	-	3.04287	0.0387	XLOC_007127	Ca_00752	-3.90621	0.001	XLOC_025211	Ca_13036	6.09901	0.0011	XLOC_007127	Ca_00752	-3.38602	0.0022
XLOC_010636	Ca_09186	2.39068	0.0001	XLOC_009638	Ca_04504	-4.30495	5e-05	XLOC_030620	-	3.01316	0.04065	XLOC_009806	Ca_05500	-3.87621	0.0008	XLOC_001395	Ca_21847	5.87501	0.0218	XLOC_020353	-	-3.32141	0.0482
XLOC_010067	Ca_14413	2.38591	5e-05	XLOC_016348	Ca_10437	-4.29106	5e-05	XLOC_008922	-	3.01157	0.0316	XLOC_018927	Ca_06299	-3.8685	0.0005	XLOC_006747	Ca_08265	5.29992	5e-05	XLOC_012262	Ca_23898	-3.32097	0.02955
XLOC_007369	Ca_01276	2.38499	0.0269	XLOC_017326	Ca_11028	-4.28924	5e-05	XLOC_025513	Ca_26635	2.99464	0.00085	XLOC_020054	Ca_13662	-3.84902	5e-05	XLOC_016100	-	5.05337	0.0002	XLOC_015143	Ca_04764	-3.28574	0.00395
XLOC_021312	Ca_14532	2.37952	0.00875	XLOC_022791	Ca_12327	-4.27568	0.00345	XLOC_010473	Ca_14872,Ca_14873	2.99418	0.0182	XLOC_009362	Ca_03535	-3.81528	0.00435	XLOC_027749	Ca_27075	5.00165	0.01875	XLOC_030027	-	-3.25662	0.0278
XLOC_027095	Ca_25510	2.37267	0.00775	XLOC_026796	-	-4.27113	5e-05	XLOC_004346	-	2.98451	0.00055	XLOC_016147	-	-3.80113	0.0254	XLOC_011992	-	4.47034	0.0168	XLOC_008299	Ca_07290	-3.19495	5e-05
XLOC_011633	Ca_05458	2.3688	0.03955	XLOC_003592	Ca_16987	-4.27057	5e-05	XLOC_019979	Ca_19033	2.98393	0.01495	XLOC_003488	-	-3.80076	5e-05	XLOC_001240	Ca_20640	4.37648	0.02305	XLOC_018513	Ca_09609	-3.16811	0.0002
XLOC_000892	Ca_14069	2.36807	0.02445	XLOC_020173	-	-4.25575	0.00035	XLOC_001127	Ca_17382	2.94012	0.028	XLOC_011188	Ca_03481,Ca_03482	-3.75399	5e-05	XLOC_014523	Ca_18716	4.37201	0.00145	XLOC_024520	Ca_17879	-3.09337	0.0011
XLOC_003458	-	2.31977	0.00365	XLOC_019756	-	-4.20066	0.0009	XLOC_015311	Ca_01862	2.9093	0.01045	XLOC_019523	Ca_15777	-3.74285	5e-05	XLOC_006794	Ca_08181	4.32786	0.01455	XLOC_027331	-	-3.03516	0.01915
XLOC_021939	Ca_22549	2.31061	5e-05	XLOC_023215	-	-4.19861	0.0011	XLOC_003567	-	2.89815	0.04765	XLOC_020346	-	-3.73231	5e-05	XLOC_010473	Ca_14872,Ca_14873	4.1778	0.0057	XLOC_006434	Ca_19622	-3.00481	0.0007
XLOC_019470	Ca_22234	2.29433	0.04815	XLOC_030393	-	-4.19693	0.0002	XLOC_014654	-	2.86535	0.03365	XLOC_029069	Ca_22198	-3.71782	5e-05	XLOC_023161	Ca_10057	4.01916	5e-05	XLOC_002479	Ca_14111	-2.99682	0.00145
XLOC_008429	Ca_11980	2.26424	0.04525	XLOC_028673	Ca_26564	-4.18729	0.0415	XLOC_007686	Ca_21014	2.85581	0.0037	XLOC_011181	Ca_03495	-3.6724	5e-05	XLOC_003387	-	3.99198	0.04745	XLOC_008518	Ca_00733	-2.95995	0.021
XLOC_029429	Ca_24571	2.23678	0.00435	XLOC_027974	Ca_27756	-4.16929	5e-05	XLOC_027484	-	2.82262	0.0081	XLOC_009823	Ca_05476	-3.64272	5e-05	XLOC_022860	Ca_14495	3.96189	0.01405	XLOC_020197	-	-2.95533	5e-05
XLOC_014420	Ca_26506	2.23179	0.0098	XLOC_004290	Ca_14296	-4.13909	5e-05	XLOC_029059	Ca_26395,Ca_26396	2.78833	5e-05	XLOC_019251	Ca_24160	-3.63191	5e-05	XLOC_021397	Ca_16244	3.74751	5e-05	XLOC_012754	Ca_18177	-2.92351	0.04255
XLOC_017720	-	2.22847	0.01295	XLOC_027973	Ca_27757	-4.13674	5e-05	XLOC_027479	Ca_27284	2.75889	0.0413	XLOC_008685	Ca_01059	-3.62908	0.0057	XLOC_016339	Ca_10423	3.73085	5e-05	XLOC_014420	Ca_26506	-2.90321	0.00325
XLOC_020284	-	2.20277	0.01005	XLOC_018630	-	-4.13484	5e-05	XLOC_014036	Ca_11399	2.75133	0.00085	XLOC_025328	-	-3.613	0.01325	XLOC_005635	Ca_12461	3.72979	0.0021	XLOC_025968	Ca_22967	-2.90047	0.02935
XLOC_009396	Ca_03478	2.20133	0.03	XLOC_021590	Ca_10000	-4.12706	5e-05	XLOC_025783	Ca_27404	2.72371	0.00245	XLOC_001033	Ca_06923	-3.61102	5e-05	XLOC_026743	-	3.63181	0.0073	XLOC_002482	Ca_14114	-2.86497	0.0003
XLOC_007047	Ca_11998	2.197	0.00315	XLOC_026797	-	-4.11612	0.0415	XLOC_012612	-	2.71527	0.03735	XLOC_000488	Ca_00651	-3.60994	5e-05	XLOC_019796	Ca_13523,Ca_13524	3.53844	0.0003	XLOC_001949	Ca_00414	-2.81284	5e-05
XLOC_020837	Ca_15330	2.194	0.00025	XLOC_005961	-	-4.07519	5e-05	XLOC_009020	-	2.6875	0.01705	XLOC_000978	Ca_07043	-3.59533	0.0027	XLOC_020946	Ca_09377	3.52556	0.00055	XLOC_012203	Ca_13096	-2.81045	5e-05
XLOC_029707	Ca_23129	2.19081	0.00035	XLOC_005310	Ca_24536	-4.07484	0.0009	XLOC_014173	Ca_03908	2.6854	0.01615	XLOC_009638	Ca_04504	-3.59226	5e-05	XLOC_029059	Ca_26395,Ca_26396	3.44022	5e-05	XLOC_000350	Ca_00388	-2.80819	0.00065
XLOC_015890	Ca_04040	2.18959	0.0001	XLOC_018374	Ca_05813	-4.0494	5e-05	XLOC_013534	Ca_04906	2.65721	0.02235	XLOC_019406	Ca_16462	-3.56912	5e-05	XLOC_023945	Ca_02348	3.38369	0.0067	XLOC_021597	Ca_16156	-2.77374	0.03575
XLOC_016716	Ca_08569	2.16808	5e-05	XLOC_001236	Ca_22105	-4.04705	5e-05	XLOC_007552	Ca_24828,Ca_24829,Ca_24830	2.62556	0.0013	XLOC_020212	-	-3.56792	0.0021	XLOC_021870	-	3.38085	5e-05	XLOC_007801	Ca_23335	-2.77362	0.0317
XLOC_016172	-	2.16021	0.00035	XLOC_011618	Ca_05501	-4.04183	0.00375	XLOC_004839	Ca_10561	2.60594	5e-05	XLOC_019949	-	-3.5099	5e-05	XLOC_013434	-	3.32521	0.0065	XLOC_012718	-	-2.69369	0.0203
XLOC_017198	Ca_11281	2.15761	0.00235	XLOC_009362	Ca_03535	-4.03819	0.0002	XLOC_029535	-	2.5958	0.00825	XLOC_012089	Ca_20019	-3.486	5e-05	XLOC_009683	Ca_04587	3.30608	0.00645	XLOC_016579	Ca_09638	-2.6598	0.03585
XLOC_015829	Ca_03918	2.14728	0.0017	XLOC_000916	Ca_14130	-4.0316	5e-05	XLOC_016993	-	2.57813	0.0044	XLOC_014186	Ca_03926	-3.4817	5e-05	XLOC_003085	-	3.25495	0.01355	XLOC_001032	Ca_06924	-2.647	0.0211
XLOC_009630	Ca_04485	2.14567	0.0169	XLOC_020054	Ca_13662	-4.0274	5e-05	XLOC_029153	Ca_28195	2.54264	0.0283	XLOC_008088	Ca_06009	-3.47757	5e-05	XLOC_025055	Ca_11541	3.14891	0.00015	XLOC_022330	Ca_06646	-2.63311	0.0005
XLOC_012235	Ca_14909	2.14543	0.00135	XLOC_009637	Ca_04503	-4.02153	0.00445	XLOC_008206	Ca_08122	2.49675	0.0055	XLOC_000570	Ca_07988	-3.46584	5e-05	XLOC_002647	-	3.14826	0.0332	XLOC_005681	-	-2.58037	5e-05
XLOC_023079	Ca_11703	2.13485	0.00045	XLOC_022592	Ca_09241	-3.99178	5e-05	XLOC_006017	-	2.49298	0.02505	XLOC_012455	Ca_18356	-3.4412	5e-05	XLOC_020350	-	3.14396	0.00055	XLOC_002480	Ca_14112	-2.54137	0.00185
XLOC_018971	Ca_06386	2.1223	0.00325	XLOC_028615	Ca_25598	-3.9907	5e-05	XLOC_025781	Ca_27403	2.49168	0.0335	XLOC_018374	Ca_05813	-3.38431	0.00685	XLOC_019742	-	3.13634	0.0108	XLOC_028918	Ca_22296	-2.53948	0.0386
XLOC_022541	Ca_09362	2.11856	0.0002	XLOC_000368	Ca_00422	-3.98993	5e-05	XLOC_014889	Ca_15605	2.48385	0.0057	XLOC_026236	Ca_22597	-3.3835	5e-05	XLOC_010571	Ca_09065	3.11318	0.0058	XLOC_028540	Ca_21291	-2.50566	0.00155
XLOC_009421	Ca_03421	2.10059	0.0097	XLOC_025007	-	-3.97913	0.0135	XLOC_029019	Ca_25278	2.46388	0.0316	XLOC_010695	Ca_19253	-3.38282	0.0491	XLOC_024731	Ca_02300	3.09995	0.00165	XLOC_030720	-	-2.47876	5e-05
XLOC_023649	-	2.09808	0.0448	XLOC_009163	Ca_12146	-3.97719	5e-05	XLOC_007164	Ca_00824	2.45994	0.00315	XLOC_020164	-	-3.34121	5e-05	XLOC_015394	Ca_01688	3.0945	0.01545	XLOC_025336	-	-2.47483	0.0001
XLOC_016613	Ca_09578	2.09435	5e-05	XLOC_021149	Ca_09873	-3.97204	5e-05	XLOC_027751	-	2.45893	0.0469	XLOC_025537	Ca_17212	-3.32313	5e-05	XLOC_007329	Ca_01188	3.07002	0.0003	XLOC_005338	Ca_24630	-2.44592	0.00765
XLOC_020263	-	2.09022	0.0382	XLOC_002207	Ca_02925	-3.9645	5e-05	XLOC_025785	-	2.45444	0.03	XLOC_005563	Ca_16138	-3.31948	5e-05	XLOC_003592	Ca_16987	3.05506	0.00035	XLOC_020288	-	-2.42376	0.02875
XLOC_020113	Ca_18876	2.06735	0.00705	XLOC_013388	Ca_13340	-3.95544	0.00035	XLOC_029865	Ca_24747	2.45339	0.01655	XLOC_000522	Ca_07909	-3.3159	5e-05	XLOC_022849	-	3.02578	0.00175	XLOC_010357	Ca_15136	-2.36235	0.0001
XLOC_013292	Ca_08997	2.01935	5e-05	XLOC_011942	Ca_21310	-3.93802	0.01705	XLOC_024560	-	2.44449	0.00425	XLOC_011297	Ca_08436	-3.27189	5e-05	XLOC_014036	Ca_11399	3.02503	0.0003	XLOC_030761	-	-2.35579	0.00115
XLOC_002477	Ca_14109	2.01632	5e-05	XLOC_011181	Ca_03495	-3.9362	5e-05	XLOC_006254	Ca_18799	2.44009	0.045	XLOC_015236	Ca_04943	-3.26515	5e-05	XLOC_027732	-	3.02319	0.02295	XLOC_023710	-	-2.35511	0.0301
XLOC_030716	Ca_23212	2.01559	0.00485	XLOC_016340	Ca_10425	-3.92378	5e-05	XLOC_027486	-	2.4233	0.02925	XLOC_005580	Ca_16099	-3.24387	0.0005	XLOC_017100	Ca_06511	3.005	0.0142	XLOC_023041	-	-2.33648	0.0242
XLOC_001862	Ca_00235	2.01304	0.03205	XLOC_020358	-	-3.92275	5e-05	XLOC_016042	-	2.39801	0.00085	XLOC_004290	Ca_14296	-3.22265	5e-05	XLOC_026795	-	2.99579	0.00025	XLOC_020163	-	-2.31814	0.0033
XLOC_017146	Ca_16377	2.00157	5e-05	XLOC_024263	Ca_11443	-3.91246	5e-05	XLOC_014657	-	2.36304	0.0119	XLOC_007179	Ca_00861	-3.21933	5e-05	XLOC_020270	-	2.99081	0.01625	XLOC_023068	Ca_11729	-2.3149	5e-05
XLOC_010290	Ca_20001	1.99902	0.0085	XLOC_018998	Ca_06446	-3.91132	5e-05	XLOC_007529	-	2.3586	0.01335	XLOC_000368	Ca_00422	-3.19508	0.0005	XLOC_012441	Ca_18380	2.9899	0.02345	XLOC_016971	Ca_19660	-2.30707	0.01745
XLOC_006774	Ca_08225	1.99387	0.0035	XLOC_025328	-	-3.88212	5e-05	XLOC_024699	Ca_02358	2.34214	5e-05	XLOC_011792	Ca_17159	-3.1716	0.0261	XLOC_013667	Ca_01783	2.98492	5e-05	XLOC_027323	-	-2.30204	0.0007
XLOC_000471	Ca_00628	1.98595	5e-05	XLOC_030795	-	-3.87379	5e-05	XLOC_026408	-	2.34203	0.0039	XLOC_022783	Ca_12313	-3.17054	5e-05	XLOC_014275	Ca_04097	2.94957	5e-05	XLOC_020365	-	-2.29962	5e-05
XLOC_025058	Ca_11548	1.9843	0.00045	XLOC_019071	Ca_16373	-3.86613	0.0403	XLOC_029163	Ca_25412	2.3367	0.0018	XLOC_009947	Ca_14040	-3.14564	0.00255	XLOC_009005	-	2.92345	0.00315	XLOC_020113	Ca_18876	-2.25993	0.01515
XLOC_003197	Ca_18480	1.97761	0.0032	XLOC_020523	Ca_03171	-3.85718	5e-05	XLOC_024319	-	2.32058	0.00175	XLOC_020722	Ca_06702	-3.12907	5e-05	XLOC_005915	-	2.90192	0.0312	XLOC_000978	Ca_07043	-2.25336	0.01455
XLOC_008057	Ca_06061	1.97021	0.02025	XLOC_011792	Ca_17159	-3.84657	0.00085	XLOC_006023	-	2.31713	0.00745	XLOC_013536	Ca_04907	-3.11478	0.00445	XLOC_013918	Ca_07489	2.89499	5e-05	XLOC_004328	Ca_17277	-2.22804	0.00335
XLOC_019998	Ca_17394	1.96822	0.0003	XLOC_017316	Ca_11041	-3.83055	5e-05	XLOC_010935	Ca_07872	2.31067	0.00765	XLOC_020523	Ca_03171	-3.10009	0.0007	XLOC_022848	-	2.87598	0.00095	XLOC_008867	-	-2.21571	0.0002
XLOC_006051	Ca_22645	1.95896	0.00015	XLOC_026628	Ca_24090	-3.79363	0.01085	XLOC_012216	Ca_13069	2.29371	0.01725	XLOC_008216	Ca_08107	-3.09315	5e-05	XLOC_003918	Ca_20025	2.86355	0.0003	XLOC_014014	Ca_19212	-2.20021	0.01235
XLOC_027843	Ca_26451	1.9567	5e-05	XLOC_023968	Ca_02301	-3.73735	5e-05	XLOC_007613	-	2.28431	0.0143	XLOC_017562	-	-3.08458	0.03105	XLOC_019921	Ca_18916	2.83866	0.0006	XLOC_010486	Ca_23897	-2.19377	0.0002
XLOC_006319	Ca_22686	1.95449	0.002	XLOC_002609	Ca_06932	-3.72094	5e-05	XLOC_000660	Ca_02902	2.26312	0.01805	XLOC_018828	Ca_05233	-3.08275	5e-05	XLOC_021160	Ca_09850	2.82246	0.0001	XLOC_020670	Ca_06796	-2.17328	0.0121
XLOC_024546	Ca_15538	1.9518	0.00025	XLOC_023992	Ca_02262	-3.70445	5e-05	XLOC_004913	-	2.25974	0.02565	XLOC_027877	Ca_22996	-3.05072	0.0004	XLOC_027300	Ca_20913	2.8216	0.01255	XLOC_008970	-	-2.15263	0.00915
XLOC_012174	Ca_13143	1.94256	0.00265	XLOC_023753	-	-3.69445	5e-05	XLOC_000011	Ca_28125	2.25867	0.03585	XLOC_007737	Ca_17028	-3.04412	0.00045	XLOC_005046	Ca_21459	2.78488	0.01125	XLOC_018240	Ca_10350	-2.12665	0.0001
XLOC_010982	Ca_12134	1.94178	0.04755	XLOC_021160	Ca_09850	-3.68548	5e-05	XLOC_020837	Ca_15330	2.24152	0.00125	XLOC_006521	-	-3.04164	0.0022	XLOC_001984	-	2.77258	0.00575	XLOC_023225	Ca_16199	-2.12513	5e-05
XLOC_017443	Ca_17463	1.93088	5e-05	XLOC_010718	Ca_10838	-3.66558	5e-05	XLOC_005046	Ca_21459	2.23642	0.0134	XLOC_014861	Ca_17664	-3.04119	5e-05	XLOC_024640	Ca_15040	2.71293	5e-05	XLOC_006780	Ca_08205	-2.12048	0.0001
XLOC_018800	Ca_05188	1.92895	0.0111	XLOC_021627	Ca_20988	-3.64961	5e-05	XLOC_027489	-	2.23331	0.0353	XLOC_019755	Ca_17705	-3.01719	5e-05	XLOC_006771	Ca_08229	2.69904	0.00025	XLOC_006022	-	-2.10036	5e-05
XLOC_014283	Ca_04109	1.91709	0.0001	XLOC_025956	Ca_22970	-3.63483	0.0012	XLOC_020185	-	2.22245	0.03115	XLOC_012539	-	-3.01375	5e-05	XLOC_027355	-	2.6898	5e-05	XLOC_002670	Ca_14760	-2.09533	0.00245
XLOC_001254	Ca_20618	1.9061	0.0019	XLOC_029069	Ca_22198	-3.62475	5e-05	XLOC_014546	Ca_20339	2.21178	0.00215	XLOC_022453	Ca_15299	-3.00559	5e-05	XLOC_025513	Ca_26635	2.6895	0.00105	XLOC_020737	-	-2.06403	0.03555
XLOC_024531	Ca_17860	1.89245	0.0078	XLOC_018272	Ca_10425	-3.62319	0.00465	XLOC_011976	Ca_14166	2.2095	0.0001	XLOC_018075	Ca_13663	-3.00349	5e-05	XLOC_003193	-	2.6856	0.00055	XLOC_014302	Ca_04144	-2.05853	0.0348
XLOC_001278	Ca_19292	1.88156	0.00175	XLOC_020619	Ca_02987	-3.61389	5e-05	XLOC_007247	Ca_01016	2.19824	0.04405	XLOC_018222	Ca_10320	-2.99426	0.0001	XLOC_005372	Ca_14963	2.67108	0.02355	XLOC_019251	Ca_24160	-2.04625	0.00265
XLOC_030566	-	1.87816	0.01285	XLOC_025569	Ca_17211	-3.61252	5e-05	XLOC_018017	Ca_19018	2.17908	0.01265	XLOC_013202	-	-2.99276	0.0052	XLOC_008206	Ca_08122	2.66191	0.009	XLOC_010261	-	-2.04379	0.0134
XLOC_002628	Ca_06897	1.8684	0.02085	XLOC_019762	Ca_23440	-3.60677	5e-05	XLOC_025742	-	2.15626	0.01025	XLOC_004328	Ca_17277	-2.99143	0.00105	XLOC_017496	Ca_15160	2.63829	0.00145	XLOC_017161	Ca_16343	-2.03929	0.02825
XLOC_010992	Ca_12149	1.86783	5e-05	XLOC_019327	Ca_14581	-3.60197	5e-05	XLOC_020406	-	2.10333	0.0019	XLOC_012153	Ca_15134	-2.96148	0.00075	XLOC_004045	Ca_11637	2.61217	5e-05	XLOC_022753	-	-2.03867	0.00125
XLOC_019177	Ca_11154	1.85347	0.01835	XLOC_019738	Ca_17740	-3.59668	0.0007	XLOC_025095	-	2.08096	0.0361	XLOC_026972	Ca_25390	-2.93516	5e-05	XLOC_013722	Ca_01675	2.59367	0.0082	XLOC_020925	Ca_12814	-2.03042	0.0005
XLOC_023239	Ca_17607	1.85267	0.00045	XLOC_017737	Ca_13812	-3.58189	5e-05	XLOC_023367	Ca_16429	2.08092	0.0456	XLOC_016340	Ca_10425	-2.93305	5e-05	XLOC_011826	Ca_20129	2.58672	0.03395	XLOC_008363	Ca_12199	-2.00599	0.03665
XLOC_015508	Ca_01458	1.84863	0.028	XLOC_005580	Ca_16099	-3.58181	5e-05	XLOC_012235	Ca_14909	2.07688	0.0055	XLOC_009735	Ca_05641	-2.91656	0.0001	XLOC_001868	Ca_00247	2.58285	0.0165	XLOC_009311	Ca_03633	-1.99257	0.00065
XLOC_002532	Ca_07074	1.84695	5e-05	XLOC_019682	Ca_13806	-3.58136	0.00935	XLOC_016461	Ca_05777	2.07665	0.00285	XLOC_025569	Ca_17211	-2.9009	0.0028	XLOC_004471	Ca_12426	2.5828	0.03485	XLOC_000659	Ca_02903	-1.9907	0.00395
XLOC_004423	Ca_16084	1.84361	0.0247	XLOC_003514	-	-3.5812	5e-05	XLOC_004349	Ca_15666	2.074	0.01445	XLOC_005723	-	-2.87045	0.01775	XLOC_022275	Ca_06752	2.58122	0.00735	XLOC_008498	Ca_20892	-1.98695	0.01195
XLOC_022000	Ca_03370	1.84296	0.00065	XLOC_019523	Ca_15777	-3.58072	5e-05	XLOC_017892	Ca_19194	2.07098	0.00875	XLOC_016472	Ca_05758	-2.86352	5e-05	XLOC_006626	Ca_06173	2.57375	0.0099	XLOC_030489	-	-1.98258	0.0028
XLOC_005868	Ca_09800	1.83986	0.0003	XLOC_001255	Ca_20616	-3.57315	5e-05	XLOC_001551	Ca_18451	2.05976	0.00525	XLOC_002609	Ca_06932	-2.86217	5e-05	XLOC_006254	Ca_18799	2.57034	0.0411	XLOC_009823	Ca_05476	-1.97294	0.0004
XLOC_018106	Ca_15386	1.8314	0.03225	XLOC_026244	Ca_22589	-3.563	5e-05	XLOC_027478	Ca_27283	2.05906	0.00645	XLOC_022274	Ca_06753	-2.85909	5e-05	XLOC_001127	Ca_17382	2.56986	0.0443	XLOC_013862	Ca_01408	-1.96019	0.00575
XLOC_005338	Ca_24630	1.83024	0.0093	XLOC_025959	Ca_22974	-3.56081	0.0001	XLOC_007333	Ca_01195	2.05211	0.01965	XLOC_010718	Ca_10838	-2.85725	5e-05	XLOC_018058	Ca_13704	2.56447	0.02385	XLOC_016563	Ca_09664	-1.95741	0.00025
XLOC_015392	Ca_01693	1.82063	0.0004	XLOC_005296	Ca_15967	-3.5584	5e-05	XLOC_019181	Ca_11148	2.05112	0.0012	XLOC_003564	-	-2.83567	0.00425	XLOC_019498	-	2.55571	0.00325	XLOC_019140	Ca_11242	-1.94781	0.0008
XLOC_019398	Ca_16454	1.81933	0.03805	XLOC_007737	Ca_17028	-3.54991	5e-05	XLOC_007352	Ca_01242	2.05079	0.0203	XLOC_023497	Ca_15699	-2.83128	0.0006	XLOC_028054	Ca_24402	2.54084	0.0029	XLOC_024888	Ca_01961	-1.93356	0.0001
XLOC_009885	Ca_05353	1.81803	5e-05	XLOC_019196	Ca_11127	-3.54872	5e-05	XLOC_006458	Ca_19323	2.04475	0.03515	XLOC_016298	Ca_10354	-2.82105	5e-05	XLOC_003833	Ca_19158	2.50773	0.00315	XLOC_008913	-	-1.9146	0.0326
XLOC_021584	Ca_10009	1.81547	5e-05	XLOC_015667	-	-3.54712	5e-05	XLOC_005220	-	2.03626	0.0486	XLOC_006315	Ca_21011	-2.821	0.0018	XLOC_006441	-	2.50312	0.02295	XLOC_002056	Ca_00619	-1.90127	0.02195
XLOC_021360	-	1.81488	0.00135	XLOC_018958	Ca_06359	-3.54165	0.0022	XLOC_005292	Ca_15971	2.02579	0.02105	XLOC_013388	Ca_13340	-2.81713	0.01885	XLOC_001922	Ca_00362	2.50297	0.0054	XLOC_010992	Ca_12149	-1.88005	0.00115
XLOC_016971	Ca_19660	1.8017	0.03165	XLOC_017317	Ca_11040	-3.53883	0.0195	XLOC_026501	-	2.0179	0.0417	XLOC_003442	-	-2.80404	5e-05	XLOC_011612	Ca_05514	2.4951	0.0003	XLOC_008945	-	-1.87857	0.00455
XLOC_014129	Ca_12680	1.79235	0.0001	XLOC_005620	Ca_12485	-3.53561	0.0001	XLOC_003873	Ca_18141	2.01093	5e-05	XLOC_004501	Ca_10292	-2.80323	5e-05	XLOC_002166	Ca_08034	2.49082	0.0163	XLOC_018994	-	-1.85878	0.03635
XLOC_019469	-	1.79147	0.0153	XLOC_009168	Ca_12155	-3.52474	5e-05	XLOC_002628	Ca_06897	2.01035	0.0095	XLOC_009311	Ca_03633	-2.79784	5e-05	XLOC_030553	Ca_26775	2.48785	0.01265	XLOC_018288	Ca_05970	-1.85859	0.00875
XLOC_009964	Ca_17126	1.7905	0.0142	XLOC_010254	-	-3.52428	5e-05	XLOC_021299	Ca_14515	2.00862	0.0242	XLOC_013946	Ca_07536	-2.79397	5e-05	XLOC_022782	Ca_12312	2.48719	0.0001	XLOC_007208	Ca_00934	-1.84699	0.0003
XLOC_023652	-	1.76985	0.039	XLOC_000047	-	-3.49436	0.0315	XLOC_009971	-	2.00279	0.02095	XLOC_002624	Ca_06902	-2.78816	5e-05	XLOC_030591	Ca_22190	2.47634	0.0016	XLOC_020774	Ca_06593	-1.84099	0.0002
XLOC_010856	Ca_07731	1.76933	0.0321	XLOC_019796	Ca_13523,Ca_13524	-3.48894	0.0001	XLOC_008062	Ca_06047	1.99964	5e-05	XLOC_028674	Ca_26565	-2.78807	0.00025	XLOC_022058	Ca_03260	2.47499	0.0004	XLOC_019443	Ca_15189	-1.83037	0.0143
XLOC_025286	Ca_15504	1.76907	0.0007	XLOC_013409	Ca_16640	-3.47417	0.0009	XLOC_014627	Ca_17111	1.99053	5e-05	XLOC_013802	Ca_01522	-2.78254	5e-05	XLOC_029019	Ca_25278	2.47334	0.04635	XLOC_018075	Ca_13663	-1.82713	0.0025
XLOC_014948	Ca_08945	1.76596	0.00015	XLOC_022095	Ca_03187	-3.46259	0.0007	XLOC_015992	-	1.98829	0.03485	XLOC_013990	Ca_07629	-2.74427	5e-05	XLOC_019196	Ca_11127	2.47104	0.00255	XLOC_007577	Ca_16514	-1.8228	0.001
XLOC_009176	Ca_12166	1.75915	0.00145	XLOC_005967	-	-3.46001	0.0001	XLOC_012307	Ca_10929	1.98746	5e-05	XLOC_008344	Ca_07380	-2.73269	0.00015	XLOC_009009	-	2.46634	0.0389	XLOC_018570	Ca_16738	-1.81677	0.0026
XLOC_009800	Ca_05511	1.75226	0.00025	XLOC_028529	-	-3.45031	0.0002	XLOC_017026	Ca_06378	1.98257	0.00375	XLOC_002063	Ca_00648	-2.73002	5e-05	XLOC_016036	-	2.45144	0.02185	XLOC_015578	Ca_07447	-1.80562	0.0028
XLOC_026999	Ca_21709	1.74779	0.008	XLOC_013667	Ca_01783	-3.44917	5e-05	XLOC_005741	Ca_10173	1.98214	0.04365	XLOC_020173	-	-2.71799	0.0029	XLOC_018662	Ca_08531	2.45039	5e-05	XLOC_013734	Ca_01653	-1.80139	0.01925
XLOC_004508	Ca_10279	1.7315	0.00455	XLOC_030791	-	-3.44681	5e-05	XLOC_026536	Ca_23660	1.97688	0.0037	XLOC_011822	Ca_20139	-2.70408	0.0083	XLOC_007884	Ca_09442	2.44785	0.00045	XLOC_010920	-	-1.79223	0.00755
XLOC_011360	Ca_04334	1.72802	5e-05	XLOC_011612	Ca_05514	-3.44118	5e-05	XLOC_028054	Ca_24402	1.97527	0.00635	XLOC_005097	Ca_17578	-2.70336	0.0424	XLOC_020358	-	2.44649	0.0001	XLOC_023218	Ca_16185	-1.7627	0.04135
XLOC_023523	Ca_15747	1.72627	5e-05	XLOC_021742	Ca_16384	-3.436	0.0001	XLOC_030295	Ca_26417	1.97321	0.04785	XLOC_001949	Ca_00414	-2.70162	5e-05	XLOC_018958	Ca_06359	2.42397	0.01265	XLOC_011105	Ca_03652	-1.74569	0.0003
XLOC_002952	Ca_18506	1.72288	5e-05	XLOC_022783	Ca_12313	-3.4173	5e-05	XLOC_019583	Ca_19571,Ca_19572	1.96698	0.0226	XLOC_023919	Ca_02410	-2.70044	5e-05	XLOC_025785	-	2.42304	0.0305	XLOC_021360	-	-1.74184	0.01165
XLOC_011601	Ca_05540	1.71923	0.0199	XLOC_009806	Ca_05500	-3.39936	0.0001	XLOC_000439	Ca_00553	1.9643	0.01585	XLOC_023207	Ca_16173	-2.69744	0.00015	XLOC_027921	-	2.4163	0.00055	XLOC_020008	Ca_17416	-1.73464	0.03055
XLOC_012746	Ca_18164	1.71578	0.0346	XLOC_004177	Ca_23047	-3.38635	5e-05	XLOC_010405	Ca_13109	1.96233	0.03495	XLOC_022576	Ca_09283	-2.69372	5e-05	XLOC_006867	Ca_07199	2.41331	5e-05	XLOC_001033	Ca_06923	-1.70228	0.00085
XLOC_010199	Ca_14189	1.71429	0.03985	XLOC_020164	-	-3.37466	5e-05	XLOC_009015	-	1.9555	0.0338	XLOC_023753	-	-2.68564	5e-05	XLOC_024917	Ca_10732	2.40317	0.01205	XLOC_016127	-	-1.69868	0.03085
XLOC_022521	Ca_12830	1.71168	5e-05	XLOC_023698	-	-3.37116	0.00625	XLOC_001488	Ca_21844	1.95162	0.0002	XLOC_016772	Ca_23425	-2.67114	0.00015	XLOC_007229	Ca_00978	2.39939	5e-05	XLOC_016402	Ca_05883	-1.69526	0.02065
XLOC_004434	Ca_12508	1.70958	5e-05	XLOC_020293	-	-3.36998	0.00545	XLOC_028799	-	1.94239	0.0457	XLOC_022058	Ca_03260	-2.66591	0.00335	XLOC_001075	Ca_14788	2.39435	0.0001	XLOC_023207	Ca_16173	-1.69391	0.00845
XLOC_018250	Ca_10368	1.69582	0.00695	XLOC_009947	Ca_14040	-3.3671	5e-05	XLOC_024140	Ca_01983	1.93496	0.00095	XLOC_016600	Ca_09598	-2.66029	5e-05	XLOC_015070	Ca_16636	2.39053	5e-05	XLOC_024202	Ca_10709	-1.68234	0.0012
XLOC_008913	-	1.69157	0.0221	XLOC_021429	Ca_18932	-3.36678	5e-05	XLOC_021114	Ca_09957	1.93191	0.00185	XLOC_009017	-	-2.65185	5e-05	XLOC_001860	Ca_00232	2.38502	0.03955	XLOC_018285	-	-1.67354	0.00195
XLOC_016132	-	1.6905	0.02255	XLOC_005563	Ca_16138	-3.35693	5e-05	XLOC_023718	-	1.92508	0.02735	XLOC_013311	Ca_08966	-2.65174	0.0342	XLOC_007021	-	2.38276	0.038	XLOC_020294	-	-1.67261	0.0487
XLOC_027109	Ca_25805	1.68921	0.00255	XLOC_019986	Ca_19041	-3.33882	5e-05	XLOC_016556	Ca_09683	1.92389	0.028	XLOC_009013	-	-2.64814	0.04355	XLOC_019979	Ca_19033	2.37689	0.03145	XLOC_005024	Ca_18136	-1.67223	0.04095
XLOC_015561	Ca_07421	1.68704	5e-05	XLOC_030305	Ca_23414	-3.33556	0.00505	XLOC_020177	-	1.92227	0.0342	XLOC_005225	-	-2.6481	5e-05	XLOC_018644	Ca_08560	2.36609	0.00335	XLOC_004504	Ca_10285	-1.66409	0.0022
XLOC_011486	Ca_04574	1.6817	0.0008	XLOC_006885	Ca_07230	-3.33509	5e-05	XLOC_026493	Ca_25456	1.91476	0.0413	XLOC_019887	Ca_22908	-2.64446	0.02295	XLOC_015846	Ca_03952	2.33736	0.0033	XLOC_003448	-	-1.6593	0.0255
XLOC_021254	Ca_12361	1.68105	0.0023	XLOC_018043	Ca_17413	-3.33436	5e-05	XLOC_025042	Ca_11522	1.90838	0.0045	XLOC_026796	-	-2.64305	0.0018	XLOC_023869	Ca_15063	2.33708	0.03105	XLOC_018705	Ca_24841	-1.65278	0.02545
XLOC_024907	Ca_23582	1.67823	0.0053	XLOC_013802	Ca_01522	-3.32811	5e-05	XLOC_011076	Ca_03738	1.9021	0.0367	XLOC_003768	Ca_14696	-2.63291	5e-05	XLOC_000767	Ca_02670	2.33288	0.00025	XLOC_008503	Ca_00703	-1.64364	0.0046
XLOC_018614	Ca_08617	1.67727	0.04535	XLOC_023919	Ca_02410	-3.32256	5e-05	XLOC_014422	Ca_18664	1.88676	0.04105	XLOC_008087	Ca_06010	-2.61963	0.0001	XLOC_004389	Ca_14321	2.32113	0.00085	XLOC_019755	Ca_17705	-1.63206	0.01265
XLOC_008663	Ca_01005	1.66656	0.0214	XLOC_011541	Ca_05646	-3.32137	5e-05	XLOC_005802	Ca_16881	1.88524	0.02685	XLOC_015698	Ca_11416	-2.61558	5e-05	XLOC_009794	Ca_05518	2.30423	0.0003	XLOC_003953	Ca_17586	-1.63199	0.0055
XLOC_028375	Ca_21808	1.65774	0.0019	XLOC_020633	Ca_02946	-3.31825	5e-05	XLOC_022848	-	1.88497	0.01	XLOC_002480	Ca_14112	-2.61184	0.00145	XLOC_026077	Ca_21511,Ca_21512	2.30169	0.03435	XLOC_007688	Ca_21009	-1.63194	0.00165
XLOC_022542	Ca_09360	1.64773	0.00515	XLOC_011989	Ca_14187	-3.31657	5e-05	XLOC_005768	Ca_15256	1.88223	0.0049	XLOC_000371	Ca_00425	-2.59661	0.00025	XLOC_016686	Ca_08641	2.29912	0.011	XLOC_006018	-	-1.62835	0.00515
XLOC_026483	Ca_25539	1.64252	0.0067	XLOC_015476	Ca_01531	-3.31073	5e-05	XLOC_030619	-	1.87475	0.02875	XLOC_011461	Ca_04528	-2.57971	5e-05	XLOC_000218	Ca_00142	2.29292	0.0004	XLOC_023523	Ca_15747	-1.62547	0.0005
XLOC_018932	Ca_06310	1.64235	0.00015	XLOC_019406	Ca_16462	-3.31014	5e-05	XLOC_013213	Ca_17687	1.8742	0.0246	XLOC_005612	Ca_12499	-2.57401	5e-05	XLOC_017737	Ca_13812	2.28806	0.0002	XLOC_002106	Ca_07897	-1.61771	0.0367
XLOC_023367	Ca_16429	1.63719	0.0407	XLOC_028674	Ca_26565	-3.30993	5e-05	XLOC_005032	Ca_18147	1.87228	0.0404	XLOC_028673	Ca_26564	-2.57375	0.0428	XLOC_027200	Ca_24715	2.28444	0.00025	XLOC_009137	Ca_12079	-1.61285	0.0441
XLOC_023898	Ca_02445	1.63718	0.00015	XLOC_019195	Ca_11128	-3.29845	5e-05	XLOC_021031	Ca_09225	1.87212	5e-05	XLOC_007761	Ca_18257	-2.57209	5e-05	XLOC_023685	-	2.27737	0.0112	XLOC_017572	Ca_15814	-1.60362	0.004
XLOC_020156	-	1.62745	0.04305	XLOC_008966	-	-3.29719	0.0007	XLOC_025798	Ca_23734	1.86655	0.0015	XLOC_014864	Ca_17661	-2.56953	5e-05	XLOC_025007	-	2.27064	0.0471	XLOC_028598	-	-1.59828	0.0291
XLOC_004952	Ca_14653	1.62114	0.0001	XLOC_008361	Ca_12195	-3.28413	5e-05	XLOC_013918	Ca_07489	1.85829	0.00015	XLOC_000916	Ca_14130	-2.5636	0.0004	XLOC_014173	Ca_03908	2.26141	0.04115	XLOC_004628	Ca_16873	-1.59692	0.0027
XLOC_008881	-	1.619	0.0033	XLOC_029956	Ca_27555	-3.27695	0.03175	XLOC_007167	Ca_00829	1.85682	0.0354	XLOC_027973	Ca_27757	-2.54832	5e-05	XLOC_010195	Ca_14181	2.25715	0.0057	XLOC_003535	-	-1.59614	0.02095
XLOC_030584	Ca_22178	1.61063	0.0004	XLOC_020212	-	-3.2721	5e-05	XLOC_017720	-	1.84822	0.0233	XLOC_016696	Ca_08612	-2.54761	0.0008	XLOC_027765	Ca_25576	2.24864	0.00565	XLOC_003694	Ca_10552	-1.59549	0.00225
XLOC_023012	-	1.60922	0.0172	XLOC_017173	Ca_16325	-3.25649	5e-05	XLOC_024087	Ca_02074	1.8413	0.0235	XLOC_003846	Ca_19135	-2.53684	0.00095	XLOC_030556	Ca_24592	2.24687	0.0005	XLOC_023113	Ca_10131	-1.59493	0.0038
XLOC_018676	Ca_20470	1.6049	0.0005	XLOC_018829	Ca_05235	-3.24845	5e-05	XLOC_024769	Ca_02214	1.83846	0.03905	XLOC_008967	-	-2.52708	5e-05	XLOC_025006	Ca_11458	2.24313	0.0018	XLOC_013581	-	-1.59333	0.0015
XLOC_022574	Ca_09288	1.59867	0.03645	XLOC_003531	-	-3.24299	0.0068	XLOC_016019	-	1.83789	0.0389	XLOC_027974	Ca_27756	-2.526	0.00015	XLOC_024014	Ca_02220	2.2362	0.0278	XLOC_016716	Ca_08569	-1.59059	0.00205
XLOC_015651	Ca_07604,Ca_07605	1.59652	0.00085	XLOC_015897	Ca_04052	-3.24089	0.00035	XLOC_010004	Ca_19072	1.83047	0.0149	XLOC_008361	Ca_12195	-2.52257	5e-05	XLOC_004349	Ca_15666	2.23442	0.0183	XLOC_000709	Ca_02789	-1.58878	0.00745
XLOC_029553	Ca_23286	1.5963	0.0002	XLOC_004128	Ca_16001	-3.2366	5e-05	XLOC_022691	Ca_09895	1.82814	0.0001	XLOC_000269	Ca_00234	-2.52219	5e-05	XLOC_029535	-	2.22046	0.0313	XLOC_026246	-	-1.58811	0.03345
XLOC_010529	Ca_10944	1.59582	0.03085	XLOC_016154	-	-3.23485	5e-05	XLOC_018932	Ca_06310	1.82471	5e-05	XLOC_018868	Ca_05314	-2.51906	5e-05	XLOC_023968	Ca_02301	2.21968	0.0007	XLOC_020488	Ca_03240	-1.58399	0.0465
XLOC_023188	Ca_09996	1.58194	0.00135	XLOC_008967	-	-3.23456	5e-05	XLOC_000271	Ca_00238	1.8224	0.0005	XLOC_003502	-	-2.51722	0.00745	XLOC_000121	Ca_28257	2.21861	0.0077	XLOC_012047	Ca_15492	-1.57603	0.0033
XLOC_004677	Ca_09747	1.57964	0.0009	XLOC_000393	Ca_00466	-3.23433	5e-05	XLOC_013717	Ca_01687	1.81512	0.0006	XLOC_020542	Ca_03133	-2.51044	0.0001	XLOC_017026	Ca_06378	2.19871	0.0053	XLOC_016600	Ca_09598	-1.5741	0.00165
XLOC_005986	-	1.57483	0.03005	XLOC_014572	Ca_20495	-3.23297	5e-05	XLOC_019304	Ca_14634	1.81053	0.0411	XLOC_024756	Ca_02239	-2.5099	5e-05	XLOC_020406	-	2.19854	0.0031	XLOC_019998	Ca_17394	-1.57173	0.02135
XLOC_008945	-	1.56802	0.0036	XLOC_012621	-	-3.23184	0.0154	XLOC_028076	-	1.80566	0.049	XLOC_021559	Ca_10044	-2.50954	5e-05	XLOC_021240	Ca_12326	2.1984	0.00165	XLOC_009693	Ca_04610	-1.56964	0.00255
XLOC_015402	Ca_01673	1.56358	0.00165	XLOC_030233	Ca_27576	-3.2169	5e-05	XLOC_024558	-	1.80306	0.04565	XLOC_004836	Ca_10566	-2.50005	5e-05	XLOC_017270	Ca_11122	2.19006	0.0006	XLOC_023435	Ca_20276	-1.56955	0.0025
XLOC_024834	Ca_02082	1.56241	0.02095	XLOC_000251	Ca_00196	-3.20629	0.0093	XLOC_012707	-	1.80228	0.03635	XLOC_026107	Ca_24803	-2.49438	5e-05	XLOC_015829	Ca_03918	2.18884	0.00175	XLOC_007065	Ca_12040	-1.56257	0.04505
XLOC_001143	Ca_17354	1.55253	0.0364	XLOC_025966	Ca_22983	-3.20106	0.0001	XLOC_013262	Ca_15624	1.79656	0.008	XLOC_004291	Ca_14297	-2.49057	5e-05	XLOC_001255	Ca_20616	2.18833	0.00035	XLOC_012687	-	-1.55736	0.02595
XLOC_016074	-	1.54358	0.0232	XLOC_030591	Ca_22190	-3.19286	5e-05	XLOC_026969	Ca_27376	1.79496	0.0258	XLOC_004628	Ca_16873	-2.48811	0.0001	XLOC_012997	Ca_17072	2.17938	0.0014	XLOC_023239	Ca_17607	-1.55509	0.0154
XLOC_008814	Ca_01292	1.5367	0.02245	XLOC_012222	Ca_13056	-3.18831	5e-05	XLOC_026071	-	1.78617	0.0005	XLOC_013769	Ca_01586	-2.48721	0.00045	XLOC_021429	Ca_18932	2.17673	0.00065	XLOC_005608	Ca_12504	-1.55487	0.0462
XLOC_025199	Ca_22732	1.53028	0.0191	XLOC_016413	Ca_05863	-3.18639	5e-05	XLOC_012306	Ca_10930	1.78581	0.00015	XLOC_024909	Ca_23585	-2.48064	5e-05	XLOC_014176	Ca_03911	2.17338	0.00265	XLOC_011042	Ca_03790	-1.55025	0.0064
XLOC_014158	Ca_03883	1.52443	0.0001	XLOC_025537	Ca_17212	-3.17962	5e-05	XLOC_005940	-	1.77916	0.02275	XLOC_003672	Ca_12531	-2.47901	0.02385	XLOC_003677	Ca_10587	2.17314	0.0004	XLOC_027162	Ca_24799	-1.54443	0.0046
XLOC_024202	Ca_10709	1.5239	0.0003	XLOC_020537	Ca_03143	-3.17903	0.0001	XLOC_016609	Ca_09584	1.76161	0.03095	XLOC_000206	Ca_00120	-2.47169	0.00165	XLOC_007552	Ca_24828,Ca_24829,Ca_24830	2.17076	0.00935	XLOC_004004	Ca_18067	-1.54242	0.0139
XLOC_012398	-	1.52333	0.01815	XLOC_022274	Ca_06753	-3.17685	5e-05	XLOC_011284	-	1.76047	0.0447	XLOC_023803	Ca_11907	-2.45958	0.00015	XLOC_016934	Ca_05316	2.16758	0.00835	XLOC_002842	Ca_19281	-1.54164	0.01925
XLOC_000909	Ca_14118	1.52258	0.0008	XLOC_024808	Ca_02137	-3.16305	5e-05	XLOC_022849	-	1.75589	0.03265	XLOC_005920	-	-2.45668	0.0014	XLOC_022592	Ca_09241	2.16237	0.01	XLOC_002705	Ca_17375	-1.52022	0.00475
XLOC_001949	Ca_00414	1.51984	0.0032	XLOC_016686	Ca_08641	-3.16278	0.0044	XLOC_007329	Ca_01188	1.75335	0.01255	XLOC_014187	Ca_03927	-2.44314	5e-05	XLOC_000260	Ca_00214	2.14865	0.0008	XLOC_010917	Ca_07845	-1.5193	0.0399
XLOC_020697	Ca_06738	1.51667	0.00175	XLOC_020497	Ca_03226	-3.15424	5e-05	XLOC_015544	Ca_01393	1.74769	0.0187	XLOC_023653	-	-2.44218	0.0315	XLOC_018654	Ca_08544	2.14721	0.02875	XLOC_024547	Ca_15539	-1.51692	0.0031
XLOC_023736	-	1.49989	0.01115	XLOC_001022	Ca_06943	-3.15327	5e-05	XLOC_030503	-	1.74448	0.0202	XLOC_001236	Ca_22105	-2.43465	5e-05	XLOC_010966	Ca_12110	2.14462	0.0078	XLOC_012372	Ca_09104	-1.51119	0.00145
XLOC_021182	Ca_15884	1.49295	0.00185	XLOC_014284	Ca_04114	-3.14973	5e-05	XLOC_024934	Ca_10703	1.73916	0.0132	XLOC_007228	Ca_00975	-2.42227	0.02135	XLOC_014284	Ca_04114	2.13037	0.00035	XLOC_021944	Ca_26357	-1.50915	0.00225
XLOC_023161	Ca_10057	1.48862	0.00055	XLOC_026188	-	-3.14266	5e-05	XLOC_025110	Ca_19748	1.73714	0.0428	XLOC_030233	Ca_27576	-2.42093	0.0052	XLOC_003364	Ca_12903	2.12911	0.03975	XLOC_011670	Ca_05396	-1.48372	0.0349
XLOC_013423	Ca_16669	1.48173	0.0262	XLOC_005503	Ca_15683	-3.13394	5e-05	XLOC_026998	Ca_21703	1.732	0.00075	XLOC_005296	Ca_15967	-2.40676	5e-05	XLOC_020473	Ca_03267	2.1245	0.04505	XLOC_007776	Ca_18279	-1.47638	0.0054
XLOC_002597	Ca_06955	1.47977	0.00045	XLOC_001276	Ca_19296	-3.12793	0.021	XLOC_028231	Ca_20526	1.73084	0.0274	XLOC_024073	Ca_02100	-2.40403	0.02335	XLOC_028846	Ca_27766	2.12193	0.0179	XLOC_021589	Ca_10002	-1.47576	0.0214
XLOC_020916	Ca_12802	1.47975	0.0037	XLOC_011168	Ca_03529	-3.1155	0.00485	XLOC_014869	Ca_17652	1.72929	0.00925	XLOC_008966	-	-2.39997	0.0111	XLOC_007746	Ca_17044	2.11759	0.00115	XLOC_003025	Ca_26405	-1.46819	0.0421
XLOC_016856	Ca_05143	1.47687	0.0399	XLOC_002835	Ca_19295,Ca_19297	-3.11374	5e-05	XLOC_019541	Ca_23963	1.72815	0.032	XLOC_013415	Ca_16651	-2.39762	5e-05	XLOC_009118	Ca_07859	2.09296	0.00065	XLOC_023698	-	-1.46759	0.0144
XLOC_013862	Ca_01408	1.47631	0.00635	XLOC_025248	-	-3.10685	5e-05	XLOC_007746	Ca_17044	1.71994	0.0037	XLOC_014165	Ca_03894	-2.39676	5e-05	XLOC_026408	-	2.08945	0.0078	XLOC_023468	Ca_20205	-1.46757	0.01145
XLOC_010665	Ca_18358	1.47374	0.00045	XLOC_016696	Ca_08612	-3.10058	5e-05	XLOC_023478	Ca_25040	1.71785	0.0021	XLOC_024192	Ca_10731	-2.39335	5e-05	XLOC_015992	-	2.08798	0.04855	XLOC_019355	Ca_17486	-1.4558	0.0126
XLOC_024342	Ca_18424	1.45493	0.0035	XLOC_008088	Ca_06009	-3.09599	5e-05	XLOC_007767	Ca_18263	1.70807	0.0269	XLOC_022341	Ca_06626	-2.38615	0.0003	XLOC_022931	Ca_19909	2.08631	0.02355	XLOC_000836	Ca_02547	-1.45358	0.02465
XLOC_017376	Ca_16717	1.45098	0.0013	XLOC_000488	Ca_00651	-3.09546	5e-05	XLOC_001174	-	1.70762	0.0065	XLOC_017208	Ca_11261	-2.38233	0.0003	XLOC_019756	-	2.08189	0.0111	XLOC_005021	Ca_18130	-1.44642	0.005
XLOC_002757	-	1.43813	0.00035	XLOC_024751	Ca_02248	-3.09161	5e-05	XLOC_016475	Ca_05752	1.70668	0.0085	XLOC_003450	-	-2.37806	0.0043	XLOC_022059	Ca_03259	2.07907	0.0022	XLOC_022802	Ca_12342	-1.44572	0.00715
XLOC_017256	-	1.43632	0.0038	XLOC_012821	Ca_25890	-3.08737	0.04045	XLOC_020186	-	1.70163	0.00255	XLOC_012708	-	-2.37418	0.00285	XLOC_004346	-	2.07629	0.00595	XLOC_017373	Ca_16710	-1.44322	0.0104
XLOC_012378	Ca_09111	1.43576	0.02045	XLOC_019892	Ca_22917	-3.08372	5e-05	XLOC_029226	Ca_21732	1.69787	0.0028	XLOC_010036	Ca_14467	-2.37257	5e-05	XLOC_016442	Ca_05815	2.07507	0.0039	XLOC_016570	Ca_09649	-1.44245	0.0084
XLOC_015432	Ca_01608	1.43428	0.03185	XLOC_016147	-	-3.07952	0.00425	XLOC_023484	-	1.68899	0.0486	XLOC_017810	-	-2.3662	0.01145	XLOC_004122	Ca_16014	2.07019	0.00365	XLOC_026193	Ca_19775	-1.44205	0.0337
XLOC_007048	Ca_12001	1.43252	0.01105	XLOC_013980	Ca_07614	-3.06867	5e-05	XLOC_023268	Ca_17767	1.68704	0.0049	XLOC_016914	Ca_05270	-2.36366	0.00165	XLOC_016788	-	2.06076	0.02895	XLOC_012385	Ca_09126	-1.43848	0.0218
XLOC_015604	Ca_07506	1.43085	0.00155	XLOC_022576	Ca_09283	-3.06798	5e-05	XLOC_006496	-	1.68343	0.0273	XLOC_018846	Ca_05270	-2.35769	0.04685	XLOC_019379	Ca_17448	2.0569	0.00015	XLOC_028145	-	-1.43212	0.0081
XLOC_022518	Ca_12823	1.42688	0.02025	XLOC_014251	Ca_04059	-3.0633	5e-05	XLOC_021479	Ca_11732	1.67953	0.01055	XLOC_022753	-	-2.35239	5e-05	XLOC_006416	Ca_21116	2.05404	0.00065	XLOC_015025	Ca_13380	-1.43159	0.0038
XLOC_016385	Ca_05930	1.42556	0.0117	XLOC_025336	-	-3.05738	0.00125	XLOC_012653	-	1.67771	0.0069	XLOC_018929	-	-2.3442	0.0281	XLOC_010899	Ca_07806	2.0539	0.00335	XLOC_006238	Ca_20958	-1.42747	0.02935
XLOC_003115	Ca_21834	1.42358	0.00225	XLOC_018897	Ca_19680	-3.05683	5e-05	XLOC_013744	Ca_01639	1.67236	0.01225	XLOC_012203	Ca_13096	-2.34121	5e-05	XLOC_030503	-	2.05304	0.02475	XLOC_018743	Ca_05088	-1.42569	0.0241
XLOC_006488	Ca_09407	1.42205	0.0027	XLOC_013735	-	-3.05674	0.0067	XLOC_007663	Ca_19392	1.6705	0.00045	XLOC_022059	Ca_03259	-2.3396	5e-05	XLOC_009163	Ca_12146	2.05291	0.00205	XLOC_003138	Ca_13966	-1.41868	0.028
XLOC_018705	Ca_24841	1.41218	0.0141	XLOC_020903	Ca_12780	-3.053	5e-05	XLOC_021556	Ca_10049	1.66609	0.002	XLOC_005129	Ca_18774	-2.33777	0.0061	XLOC_024064	Ca_02116	2.04632	0.00015	XLOC_010336	Ca_14819	-1.41435	0.00395
XLOC_009438	Ca_08345	1.41048	0.0027	XLOC_018222	Ca_10320	-3.05246	0.00015	XLOC_018422	Ca_05703	1.66048	0.0381	XLOC_008205	Ca_08124	-2.33721	5e-05	XLOC_024817	Ca_02122	2.04514	0.0162	XLOC_002477	Ca_14109	-1.41333	0.01505
XLOC_018643	Ca_08561	1.40651	0.0465	XLOC_007884	Ca_09442	-3.04533	5e-05	XLOC_014891	Ca_15611	1.65983	0.0364	XLOC_025248	-	-2.33634	5e-05	XLOC_014889	Ca_15605	2.04312	0.02655	XLOC_000940	-	-1.40697	0.00445
XLOC_020748	Ca_06650	1.40029	0.0437	XLOC_004590	Ca_15242	-3.0356	5e-05	XLOC_002388	Ca_02576	1.65793	0.00095	XLOC_023992	Ca_02262	-2.33245	0.0001	XLOC_012893	Ca_20329	2.04283	0.0023	XLOC_030599	Ca_22186	-1.4047	0.021
XLOC_003568	-	1.40013	0.03225	XLOC_025926	-	-3.03467	0.0011	XLOC_006591	Ca_06245	1.65774	0.00315	XLOC_018652	Ca_08546	-2.32855	0.0015	XLOC_005180	Ca_11669	2.03664	0.0388	XLOC_006988	Ca_12222	-1.39953	0.01325
XLOC_001123	Ca_17387	1.39557	0.0033	XLOC_012654	-	-3.03233	0.0267	XLOC_022757	Ca_15844	1.65607	0.0167	XLOC_000393	Ca_00466	-2.32507	5e-05	XLOC_015459	Ca_01562	2.034	0.01155	XLOC_000664	Ca_02892	-1.39911	0.0299
XLOC_011152	Ca_03568	1.39486	0.0226	XLOC_025198	Ca_22731	-3.01999	0.00145	XLOC_004912	Ca_21097	1.65366	0.0063	XLOC_016154	-	-2.32489	5e-05	XLOC_009792	Ca_05520	2.0333	0.0477	XLOC_014283	Ca_04109	-1.3964	0.01935
XLOC_002599	Ca_06952	1.38999	0.0195	XLOC_010195	Ca_14181	-3.01555	0.0012	XLOC_000283	Ca_00263	1.65137	0.0088	XLOC_019517	Ca_15786	-2.31815	0.00505	XLOC_027003	Ca_21715	2.02958	0.00245	XLOC_009800	Ca_05511	-1.39574	0.0257
XLOC_005597	Ca_12525	1.38897	0.0135	XLOC_002063	Ca_00648	-3.01175	5e-05	XLOC_019013	Ca_06474	1.64795	0.00155	XLOC_005053	Ca_22315	-2.31361	0.0011	XLOC_021656	Ca_17644	2.02178	0.0286	XLOC_008171	Ca_08187	-1.39414	0.00805
XLOC_015028	Ca_13376	1.38595	0.03805	XLOC_006579	Ca_06271	-3.01052	0.04575	XLOC_004289	Ca_14294	1.6475	0.04985	XLOC_020668	Ca_06803	-2.30122	5e-05	XLOC_001628	Ca_13579	2.0149	0.001	XLOC_021145	Ca_09882	-1.39322	0.0096
XLOC_017950	Ca_22919	1.38463	0.00085	XLOC_005505	Ca_15687	-3.00416	5e-05	XLOC_016141	-	1.64368	0.00405	XLOC_008659	Ca_00999	-2.29688	5e-05	XLOC_020639	Ca_06855	2.0129	0.04925	XLOC_009097	Ca_07812	-1.38975	0.00815
XLOC_019825	Ca_13462	1.38131	0.00045	XLOC_010914	Ca_07840	-2.9961	5e-05	XLOC_003654	Ca_12566	1.63798	0.00015	XLOC_007331	Ca_01193	-2.29271	0.0012	XLOC_005387	Ca_21663	2.01225	0.0003	XLOC_014894	Ca_15623	-1.388	0.0081
XLOC_010494	Ca_11006	1.37938	0.001	XLOC_019921	Ca_18916	-2.99557	0.0003	XLOC_008515	-	1.63709	0.01575	XLOC_015083	Ca_16662	-2.29076	0.0002	XLOC_021114	Ca_09957	2.00917	0.003	XLOC_013366	Ca_13402	-1.38695	0.03655
XLOC_002917	Ca_20295	1.37661	0.00415	XLOC_015122	Ca_04732	-2.99037	0.0043	XLOC_028518	Ca_25784	1.63397	0.0461	XLOC_015194	Ca_04863	-2.29068	5e-05	XLOC_028231	Ca_20526	2.0087	0.01165	XLOC_019741	Ca_17734	-1.3862	0.03295
XLOC_016575	Ca_09643	1.37302	0.0054	XLOC_020139	-	-2.98675	0.00285	XLOC_012042	Ca_15484	1.63318	0.0348	XLOC_014358	-	-2.28976	5e-05	XLOC_026572	Ca_24033	2.00835	0.00285	XLOC_001490	Ca_23527	-1.38298	0.01795
XLOC_005039	Ca_21476	1.37249	0.00055	XLOC_000350	Ca_00388	-2.98339	0.0022	XLOC_007517	Ca_22085	1.63261	0.0003	XLOC_020365	-	-2.28594	5e-05	XLOC_013980	Ca_07614	2.00531	0.00925	XLOC_009491	Ca_08448	-1.37382	0.0044
XLOC_002349	Ca_02659	1.37217	0.00135	XLOC_013415	Ca_16651	-2.98337	5e-05	XLOC_003333	Ca_25114	1.62572	0.01485	XLOC_005642	Ca_12448	-2.28546	5e-05	XLOC_006746	-	2.0039	0.00125	XLOC_017485	Ca_16490	-1.37228	0.01095
XLOC_007128	Ca_00755	1.37168	0.003	XLOC_003563	-	-2.97551	0.0379	XLOC_012360	Ca_09081	1.62031	0.01595	XLOC_015846	Ca_03952	-2.27834	0.00245	XLOC_022163	Ca_03066	2.00298	0.0012	XLOC_011200	Ca_03455	-1.37086	0.01385
XLOC_022873	Ca_14520	1.36887	0.03625	XLOC_005927	-	-2.97356	0.0045	XLOC_010393	Ca_13135	1.61975	0.014	XLOC_025579	-	-2.26884	0.00645	XLOC_002798	Ca_20639	2.00043	0.00035	XLOC_005872	Ca_09807	-1.36644	0.03495
XLOC_015178	Ca_04831	1.36857	0.0242	XLOC_004836	Ca_10566	-2.97031	5e-05	XLOC_022626	Ca_23029	1.61842	0.00025	XLOC_009266	Ca_03702	-2.26688	0.00165	XLOC_023746	-	1.99796	0.0005	XLOC_010013	Ca_20150	-1.36633	0.01065
XLOC_007957	Ca_06260	1.36193	0.0024	XLOC_013416	Ca_16654	-2.96802	0.0022	XLOC_007575	Ca_16517	1.61261	0.0161	XLOC_018829	Ca_05235	-2.26402	5e-05	XLOC_005777	Ca_15274	1.99741	0.0005	XLOC_019550	Ca_19814	-1.34598	0.01435
XLOC_016845	Ca_05124	1.36176	0.0371	XLOC_003956	Ca_17581,Ca_17582	-2.96688	5e-05	XLOC_021244	Ca_12340	1.61151	0.0161	XLOC_022126	Ca_03124	-2.26152	0.0002	XLOC_024934	Ca_10703	1.99676	0.00395	XLOC_024964	Ca_10642	-1.34542	0.01295
XLOC_000906	Ca_14103	1.35997	0.04525	XLOC_001016	Ca_06963	-2.96566	5e-05	XLOC_004255	Ca_14236	1.61116	0.0029	XLOC_003135	Ca_13970	-2.25975	5e-05	XLOC_029307	Ca_26707	1.99664	0.0238	XLOC_015356	Ca_01766	-1.34501	0.02005
XLOC_015967	Ca_04201	1.35704	0.0054	XLOC_023803	Ca_11907	-2.96202	5e-05	XLOC_007304	Ca_01119	1.61106	0.003	XLOC_005969	-	-2.25844	0.00225	XLOC_005503	Ca_15683	1.99356	0.0062	XLOC_011499	Ca_04606	-1.3444	0.00815
XLOC_025141	Ca_16791	1.35575	0.00205	XLOC_004848	Ca_10545	-2.9575	5e-05	XLOC_018789	Ca_05169	1.61089	0.00035	XLOC_016634	Ca_09536	-2.25312	5e-05	XLOC_019738	Ca_17740	1.98945	0.0114	XLOC_008643	Ca_00970	-1.33733	0.0113
XLOC_004584	Ca_15234	1.35552	0.0015	XLOC_012193	Ca_13108	-2.9568	5e-05	XLOC_011674	Ca_05391	1.60426	0.0012	XLOC_022041	Ca_03299	-2.25054	0.02995	XLOC_023171	Ca_10036	1.98247	0.0071	XLOC_012171	Ca_15087	-1.33326	0.0068
XLOC_008331	Ca_07357	1.3475	0.01595	XLOC_001705	Ca_12915	-2.94887	5e-05	XLOC_021637	Ca_17608	1.60346	0.00245	XLOC_019794	Ca_13527	-2.25028	0.0001	XLOC_018326	Ca_05908	1.97927	0.00185	XLOC_003182	Ca_18447	-1.33002	0.01365
XLOC_020925	Ca_12814	1.34643	0.0053	XLOC_017270	Ca_11122	-2.94784	5e-05	XLOC_003703	Ca_10542	1.60281	0.0129	XLOC_005654	Ca_12420	-2.24875	0.0396	XLOC_024630	Ca_15064	1.97458	0.00555	XLOC_012180	Ca_13130	-1.32427	0.00775
XLOC_004888	Ca_10471	1.34306	0.03495	XLOC_011847	Ca_14438	-2.94541	5e-05	XLOC_028123	Ca_27794	1.60134	0.0239	XLOC_003514	-	-2.24146	5e-05	XLOC_017048	Ca_06420	1.96778	0.00025	XLOC_010246	Ca_15475	-1.32364	0.03825
XLOC_000131	-	1.33836	0.02325	XLOC_018868	Ca_05314	-2.94383	5e-05	XLOC_010895	Ca_07800	1.60093	0.00595	XLOC_021073	Ca_16068	-2.23815	5e-05	XLOC_011551	-	1.96592	0.00045	XLOC_002532	Ca_07074	-1.32215	0.01135
XLOC_006572	Ca_20407	1.33821	0.00355	XLOC_007225	Ca_00969	-2.94357	5e-05	XLOC_004598	Ca_15255	1.59934	0.02325	XLOC_004668	Ca_09735	-2.23561	0.00665	XLOC_024263	Ca_11443	1.96432	0.00275	XLOC_005600	-	-1.32186	0.0061
XLOC_000203	Ca_00114	1.32975	0.0007	XLOC_020479	Ca_03255	-2.94282	5e-05	XLOC_004677	Ca_09747	1.59404	0.0004	XLOC_024263	Ca_11443	-2.23013	5e-05	XLOC_017234	Ca_11219	1.96377	0.02625	XLOC_024084	Ca_02083	-1.32155	0.0042
XLOC_017120	Ca_06548	1.32454	0.0203	XLOC_015479	Ca_01521	-2.93665	0.00985	XLOC_010367	Ca_15117	1.58968	0.00275	XLOC_016146	-	-2.23005	5e-05	XLOC_023080	Ca_11702	1.96082	0.00215	XLOC_011160	Ca_03551	-1.32068	0.0471
XLOC_008328	Ca_07350	1.32282	0.0041	XLOC_015083	Ca_16662	-2.93115	5e-05	XLOC_020831	Ca_15341	1.58791	0.0011	XLOC_019948	-	-2.22946	0.0004	XLOC_025896	Ca_22956	1.95581	0.0013	XLOC_014187	Ca_03927	-1.31475	0.01845
XLOC_023078	Ca_11704	1.32254	0.0006	XLOC_007976	Ca_06220	-2.92887	0.04695	XLOC_028729	Ca_26528	1.58515	0.0077	XLOC_010653	Ca_18391	-2.22813	5e-05	XLOC_010254	-	1.95546	0.0035	XLOC_003425	-	-1.31008	0.01995
XLOC_005550	Ca_14333	1.32231	0.0024	XLOC_018390	Ca_05782	-2.89683	0.0467	XLOC_020106	Ca_15419	1.58207	0.0427	XLOC_008952	-	-2.2281	0.0149	XLOC_014251	Ca_04059	1.95301	0.00105	XLOC_021485	Ca_11717	-1.309	0.00795
XLOC_018024	Ca_19034	1.32196	0.0032	XLOC_002338	Ca_02678	-2.89111	0.0308	XLOC_012997	Ca_17072	1.57801	0.00885	XLOC_000251	Ca_00196	-2.22533	0.0094	XLOC_008283	Ca_07256	1.95181	0.02485	XLOC_000122	Ca_27746	-1.30552	0.0121
XLOC_022359	Ca_06597	1.32126	0.00585	XLOC_025006	Ca_11458	-2.88619	5e-05	XLOC_008085	Ca_06015	1.57667	0.00255	XLOC_009007	-	-2.22437	0.00045	XLOC_020518	Ca_03181	1.95113	0.0046	XLOC_000897	Ca_14080	-1.29115	0.0071
XLOC_029414	Ca_25365	1.3208	0.04445	XLOC_021666	Ca_17762	-2.88184	0.03805	XLOC_012400	Ca_09155	1.57284	0.0039	XLOC_024917	Ca_10732	-2.2227	0.00035	XLOC_024224	Ca_10666	1.94851	0.00375	XLOC_024483	Ca_13002	-1.29053	0.008
XLOC_026599	-	1.32057	0.00085	XLOC_007421	Ca_01374	-2.87841	5e-05	XLOC_001372	Ca_22562	1.57029	0.03815	XLOC_028615	Ca_25598	-2.21128	5e-05	XLOC_016149	-	1.94676	0.04015	XLOC_012539	-	-1.28119	0.03215
XLOC_001662	Ca_25715	1.31948	0.0027	XLOC_003395	-	-2.87458	0.0241	XLOC_007519	Ca_22089	1.56992	0.0417	XLOC_001022	Ca_06943	-2.20358	0.00015	XLOC_003497	-	1.94642	0.01825	XLOC_027877	Ca_22996	-1.27139	0.04775
XLOC_028119	Ca_20600	1.31606	0.008	XLOC_015194	Ca_04863	-2.87441	5e-05	XLOC_018593	Ca_08655	1.566	0.0428	XLOC_022467	Ca_17313	-2.20257	5e-05	XLOC_015858	Ca_03977	1.94092	0.0093	XLOC_021957	Ca_20238	-1.26628	0.0113
XLOC_024215	Ca_10678	1.31565	0.00185	XLOC_016563	Ca_09664	-2.87392	5e-05	XLOC_021480	Ca_11728	1.56583	0.00025	XLOC_008571	Ca_00844	-2.19966	5e-05	XLOC_017173	Ca_16325	1.94037	0.0005	XLOC_000269	Ca_00234	-1.26411	0.015
XLOC_009831	Ca_05462	1.31564	0.0026	XLOC_024547	Ca_15539	-2.86924	5e-05	XLOC_006516	Ca_09449	1.56507	0.01105	XLOC_005096	Ca_17579	-2.19747	0.0001	XLOC_026969	Ca_27376	1.93773	0.02945	XLOC_024600	Ca_11868	-1.26405	0.0472
XLOC_012739	-	1.31445	0.02435	XLOC_022195	Ca_02986	-2.86383	5e-05	XLOC_014915	Ca_09017	1.55869	0.0314	XLOC_024751	Ca_02248	-2.19681	0.0002	XLOC_016042	-	1.93306	0.01285	XLOC_012179	Ca_13131	-1.25799	0.0119
XLOC_025340	-	1.30753	0.01395	XLOC_013291	Ca_08998	-2.86119	0.01525	XLOC_023901	-	1.55633	0.004	XLOC_024807	Ca_02138	-2.19439	0.0119	XLOC_017750	Ca_13835	1.93237	0.01155	XLOC_015890	Ca_04040	-1.25777	0.0465
XLOC_003394	-	1.30654	0.0341	XLOC_003397	-	-2.85692	0.0088	XLOC_007514	Ca_22081	1.55572	0.0193	XLOC_030915	Ca_21401	-2.19369	5e-05	XLOC_006458	Ca_19323	1.92893	0.0385	XLOC_019809	Ca_13501	-1.25741	0.02685
XLOC_010876	Ca_07766	1.30469	0.046	XLOC_007468	-	-2.8543	0.02245	XLOC_027816	Ca_22270	1.55263	0.0031	XLOC_007421	Ca_01374	-2.19339	5e-05	XLOC_017326	Ca_11028	1.92775	0.00825	XLOC_027103	Ca_25801	-1.25659	0.01845
XLOC_012474	Ca_19241	1.30329	0.014	XLOC_007086	Ca_20876	-2.85391	0.00505	XLOC_011302	Ca_08443	1.54947	0.00255	XLOC_002207	Ca_02925	-2.19272	5e-05	XLOC_015888	Ca_04037	1.92369	0.00195	XLOC_009224	Ca_03780	-1.25328	0.02635
XLOC_001490	Ca_23527	1.29859	0.00455	XLOC_026107	Ca_24803	-2.8437	5e-05	XLOC_015713	Ca_11387	1.53543	0.02805	XLOC_007706	Ca_25328	-2.19041	0.00805	XLOC_020319	-	1.9222	0.0032	XLOC_017842	Ca_13505	-1.25122	0.0098
XLOC_001079	Ca_14783	1.29621	0.03005	XLOC_024955	Ca_10656	-2.80492	0.00525	XLOC_025199	Ca_22732	1.5352	0.0326	XLOC_001210	-	-2.18511	0.01505	XLOC_024149	Ca_01968	1.91461	0.0114	XLOC_022063	Ca_03247	-1.25031	0.03615
XLOC_017881	Ca_13444	1.29544	0.00845	XLOC_024880	Ca_01984	-2.80177	0.00495	XLOC_019707	Ca_13861	1.53209	0.0023	XLOC_025966	Ca_22983	-2.18443	0.0066	XLOC_001798	Ca_00102	1.91067	0.00395	XLOC_002232	Ca_02868	-1.25025	0.01905
XLOC_014108	Ca_12720	1.29431	0.0141	XLOC_011586	Ca_05567	-2.80075	5e-05	XLOC_020274	-	1.52896	0.02235	XLOC_022361	Ca_06592	-2.18361	0.00055	XLOC_013174	Ca_21148	1.90986	0.0017	XLOC_021227	Ca_12304	-1.24032	0.04655
XLOC_017953	Ca_22925	1.29421	0.00305	XLOC_008835	Ca_01335	-2.79042	5e-05	XLOC_020255	-	1.52885	0.0212	XLOC_006704	Ca_06008	-2.18306	5e-05	XLOC_012952	Ca_21229	1.90523	0.00425	XLOC_017478	Ca_16478	-1.23964	0.0128
XLOC_008356	Ca_07401	1.29324	0.0025	XLOC_024014	Ca_02220	-2.78631	0.0018	XLOC_022521	Ca_12830	1.52674	0.00105	XLOC_002482	Ca_14114	-2.18218	0.0005	XLOC_025328	-	1.90152	0.022	XLOC_010948	Ca_12074	-1.23963	0.0174
XLOC_000709	Ca_02789	1.29141	0.0051	XLOC_012653	-	-2.77782	0.0132	XLOC_011267	Ca_08387	1.52532	0.03765	XLOC_017567	-	-2.18117	0.0063	XLOC_006885	Ca_07230	1.89884	0.01425	XLOC_002052	Ca_00612	-1.23787	0.0126
XLOC_013514	Ca_04858	1.28623	0.0018	XLOC_019498	-	-2.75845	0.00055	XLOC_004519	Ca_10266	1.51212	0.0011	XLOC_017977	Ca_16284	-2.17977	0.00185	XLOC_016348	Ca_10437	1.89694	0.00155	XLOC_012713	-	-1.23602	0.01695
XLOC_017954	Ca_22926	1.28571	0.0368	XLOC_017799	Ca_17704	-2.75272	0.00795	XLOC_026603	-	1.50931	0.0107	XLOC_024630	Ca_15064	-2.17968	0.01315	XLOC_027579	Ca_24823	1.8951	0.01825	XLOC_011789	Ca_17152	-1.23022	0.046
XLOC_021753	Ca_16417	1.28285	0.0028	XLOC_028602	Ca_24721	-2.75256	0.0279	XLOC_018074	Ca_13665,Ca_13666	1.50708	0.00125	XLOC_004590	Ca_15242	-2.17867	5e-05	XLOC_007023	Ca_12290	1.8935	0.00495	XLOC_030029	Ca_20154	-1.22994	0.04075
XLOC_011987	Ca_14184	1.27967	0.01155	XLOC_019133	Ca_11259	-2.75225	0.0012	XLOC_013661	Ca_01803	1.50464	0.01295	XLOC_005919	-	-2.17813	0.01485	XLOC_007164	Ca_00824	1.8901	0.03335	XLOC_011324	Ca_08501	-1.22877	0.0104
XLOC_026505	-	1.27678	0.00935	XLOC_016709	Ca_08579	-2.7483	5e-05	XLOC_016916	Ca_05273	1.49652	0.01575	XLOC_011406	Ca_04426	-2.17291	0.01045	XLOC_000082	-	1.88654	0.00735	XLOC_006037	Ca_22939	-1.22546	0.03715
XLOC_013748	Ca_01633	1.27659	0.0013	XLOC_008706	Ca_01099	-2.74079	5e-05	XLOC_004227	Ca_14938	1.49607	0.00565	XLOC_021178	Ca_15889	-2.17049	0.0353	XLOC_015428	Ca_01612	1.88646	0.006	XLOC_005039	Ca_21476	-1.22516	0.01615
XLOC_001008	Ca_06975	1.27504	0.00245	XLOC_009313	Ca_03627	-2.73024	5e-05	XLOC_028498	Ca_25760	1.49537	0.041	XLOC_020978	Ca_09313	-2.16807	0.0002	XLOC_006291	Ca_19387	1.88637	0.03955	XLOC_010098	Ca_16593	-1.22196	0.0495
XLOC_009452	Ca_08365	1.27207	0.01225	XLOC_009007	-	-2.72277	5e-05	XLOC_009176	Ca_12166	1.49268	0.01565	XLOC_011847	Ca_14438	-2.16533	0.0002	XLOC_023785	-	1.87857	0.00035	XLOC_020591	Ca_03042	-1.21458	0.01815
XLOC_016945	Ca_05333	1.26705	0.0311	XLOC_009765	Ca_05578	-2.71267	5e-05	XLOC_005386	Ca_21666	1.49206	0.00135	XLOC_011586	Ca_05567	-2.16513	0.0001	XLOC_025377	-	1.87583	0.03825	XLOC_015291	Ca_01898	-1.21155	0.0306
XLOC_024049	Ca_02150	1.26699	0.0017	XLOC_024817	Ca_02122	-2.70441	0.00075	XLOC_013127	Ca_22809	1.49193	0.00075	XLOC_006985	Ca_12218	-2.16485	0.0241	XLOC_019583	Ca_19571,Ca_19572	1.8742	0.0439	XLOC_015582	Ca_07451	-1.21005	0.0435
XLOC_021674	Ca_17780	1.26694	0.0133	XLOC_025377	-	-2.69679	0.0072	XLOC_025119	Ca_16835	1.49112	0.01095	XLOC_015878	Ca_04016	-2.15965	0.00015	XLOC_018927	Ca_06299	1.87158	0.0061	XLOC_006853	-	-1.20875	0.01095
XLOC_019100	Ca_19880	1.2653	0.00155	XLOC_009621	Ca_04471	-2.69617	0.0017	XLOC_013900	Ca_07462	1.48734	0.04985	XLOC_020139	-	-2.15904	0.01365	XLOC_020685	Ca_06767	1.8706	0.04135	XLOC_014498	Ca_21565	-1.20689	0.03085
XLOC_000482	Ca_00643	1.25936	0.0028	XLOC_001811	Ca_00125	-2.69588	5e-05	XLOC_007275	Ca_01069	1.48576	0.03165	XLOC_005310	Ca_24536	-2.15299	0.00735	XLOC_030336	Ca_27195	1.86974	0.00125	XLOC_025264	Ca_17900	-1.2059	0.0342
XLOC_000126	Ca_27980	1.25818	0.0012	XLOC_009538	Ca_04304	-2.69586	5e-05	XLOC_004994	Ca_19147	1.48184	0.0134	XLOC_015702	Ca_11408	-2.15231	0.0001	XLOC_001308	Ca_25077	1.86651	0.0042	XLOC_015236	Ca_04943	-1.20573	0.01565
XLOC_028811	Ca_23621	1.25466	0.0108	XLOC_004501	Ca_10292	-2.69531	0.0001	XLOC_029053	Ca_24677	1.47847	0.0251	XLOC_003206	Ca_23120	-2.15201	0.0008	XLOC_019799	Ca_13520	1.86327	0.00025	XLOC_018392	-	-1.19976	0.01055
XLOC_011778	Ca_17130	1.25433	0.0024	XLOC_001004	Ca_06986	-2.69422	0.00885	XLOC_023840	Ca_11836	1.47841	0.04115	XLOC_020667	Ca_06804	-2.15114	5e-05	XLOC_018369	-	1.86249	0.0149	XLOC_025080	Ca_18406	-1.19817	0.0442
XLOC_004262	Ca_14247	1.24849	0.02985	XLOC_009420	Ca_03423	-2.68928	0.0003	XLOC_015334	Ca_01811	1.47778	0.00725	XLOC_010662	Ca_18364	-2.14926	0.00035	XLOC_012307	Ca_10929	1.86211	5e-05	XLOC_018617	Ca_08613	-1.19635	0.03845
XLOC_025044	Ca_11524	1.24655	0.03245	XLOC_020518	Ca_03181	-2.67486	5e-05	XLOC_022882	Ca_14546	1.47767	0.01215	XLOC_018897	Ca_19680	-2.14609	0.0003	XLOC_000267	Ca_00229	1.86181	0.0026	XLOC_017162	Ca_16342	-1.19388	0.0392
XLOC_006037	Ca_22939	1.24388	0.0046	XLOC_007998	Ca_06179	-2.66352	5e-05	XLOC_013868	Ca_01397	1.47723	0.0294	XLOC_021152	Ca_09868	-2.13673	0.00115	XLOC_012219	Ca_13065	1.85676	0.0455	XLOC_021584	Ca_10009	-1.19381	0.02135
XLOC_013247	Ca_15602	1.24123	0.0035	XLOC_027602	Ca_25016	-2.66256	0.00535	XLOC_018856	Ca_05295	1.47648	0.01305	XLOC_012193	Ca_13108	-2.13454	5e-05	XLOC_013701	Ca_01713	1.85464	0.00785	XLOC_009803	Ca_05505	-1.18824	0.0234
XLOC_019808	Ca_13504	1.24087	0.00565	XLOC_012693	-	-2.661	0.0169	XLOC_019077	Ca_16361	1.47545	0.0474	XLOC_022231	Ca_06847	-2.12766	5e-05	XLOC_003897	Ca_22312	1.85168	0.0008	XLOC_020209	-	-1.18753	0.0221
XLOC_011192	Ca_03466	1.23961	0.0015	XLOC_010913	Ca_07839	-2.65883	0.00735	XLOC_004658	Ca_09720	1.47397	0.00215	XLOC_020319	-	-2.12639	0.00615	XLOC_012622	-	1.8463	0.0088	XLOC_012217	Ca_13068	-1.18748	0.04045
XLOC_023032	Ca_11781	1.23949	0.01175	XLOC_003362	Ca_12916	-2.65077	5e-05	XLOC_021306	Ca_14527	1.47037	0.00055	XLOC_003886	Ca_21460	-2.11964	0.0001	XLOC_013388	Ca_13340	1.84466	0.0096	XLOC_024494	Ca_12975	-1.18582	0.03655
XLOC_015051	Ca_13343	1.23897	0.00765	XLOC_019349	Ca_17493	-2.64903	0.0045	XLOC_003918	Ca_20025	1.46945	0.018	XLOC_009313	Ca_03627	-2.11501	5e-05	XLOC_023204	Ca_16169	1.84018	0.0049	XLOC_009727	Ca_05658	-1.17829	0.0224
XLOC_007097	Ca_00707	1.23819	0.03325	XLOC_004212	Ca_14956	-2.64701	0.00885	XLOC_023685	-	1.45621	0.0407	XLOC_015785	Ca_12684	-2.11462	0.00055	XLOC_008834	Ca_01334	1.84007	0.00135	XLOC_020223	-	-1.17714	0.0178
XLOC_017960	Ca_18895	1.23577	0.01925	XLOC_015070	Ca_16636	-2.64676	5e-05	XLOC_011030	Ca_03811	1.45545	0.00865	XLOC_024650	Ca_15022	-2.11444	0.0028	XLOC_020542	Ca_03133	1.83834	0.0418	XLOC_018177	Ca_13290	-1.17709	0.0145
XLOC_027544	Ca_24892	1.2324	0.0046	XLOC_004448	Ca_12474	-2.63644	0.0003	XLOC_013104	Ca_24492	1.45452	0.0207	XLOC_003460	-	-2.11424	5e-05	XLOC_025569	Ca_17211	1.83712	0.0047	XLOC_010363	Ca_15128	-1.17657	0.03685
XLOC_019401	Ca_16456	1.23064	0.0135	XLOC_008277	Ca_07249	-2.63117	0.003	XLOC_021055	Ca_16048	1.45402	0.0047	XLOC_011541	Ca_05646	-2.111	0.0126	XLOC_011047	Ca_03785	1.83517	0.00185	XLOC_003529	-	-1.17348	0.0347
XLOC_002106	Ca_07897	1.22832	0.0391	XLOC_022434	Ca_15343	-2.62767	5e-05	XLOC_001527	Ca_13931	1.45112	0.0009	XLOC_004699	Ca_09785	-2.10961	0.00385	XLOC_023403	Ca_25099	1.83454	0.01145	XLOC_015651	Ca_07604,Ca_07605	-1.16558	0.01215
XLOC_007512	Ca_22079	1.22784	0.04495	XLOC_030336	Ca_27195	-2.626	5e-05	XLOC_003979	Ca_18791	1.44971	0.0347	XLOC_025335	-	-2.10873	0.0035	XLOC_008733	Ca_01153	1.8329	0.00745	XLOC_000520	Ca_07906	-1.15965	0.0467
XLOC_005316	Ca_24543	1.22746	0.0023	XLOC_019922	Ca_18917	-2.62423	0.0091	XLOC_019002	Ca_06452	1.44906	0.01285	XLOC_020633	Ca_02946	-2.10774	0.01145	XLOC_026653	Ca_25633	1.82517	0.0234	XLOC_004368	Ca_14375	-1.15911	0.04255
XLOC_001513	Ca_13953	1.22602	0.01555	XLOC_008960	-	-2.62256	0.02435	XLOC_025144	Ca_23839	1.44476	0.0029	XLOC_013506	Ca_04847	-2.10677	0.00015	XLOC_019618	Ca_15950	1.82149	0.0067	XLOC_010279	Ca_20349	-1.15871	0.043
XLOC_018806	Ca_05200	1.22518	0.0361	XLOC_018846	Ca_05270	-2.62117	0.0398	XLOC_009992	Ca_19052,Ca_19053	1.43625	0.0095	XLOC_022195	Ca_02986	-2.09755	0.0008	XLOC_002337	Ca_02679	1.81928	0.00425	XLOC_024204	Ca_10701	-1.15734	0.0374
XLOC_003138	Ca_13966	1.22354	0.01335	XLOC_022931	Ca_19909	-2.62034	0.0014	XLOC_013095	Ca_24755	1.43567	0.01675	XLOC_028742	Ca_26583	-2.09746	5e-05	XLOC_000691	Ca_02831	1.81916	0.0159	XLOC_021821	Ca_17979	-1.15727	0.01735
XLOC_016570	Ca_09649	1.22246	0.00405	XLOC_009017	-	-2.61951	5e-05	XLOC_005856	Ca_09773	1.43333	0.0014	XLOC_016101	-	-2.09336	0.04815	XLOC_012485	-	1.8176	0.00195	XLOC_027869	Ca_26160	-1.15681	0.0474
XLOC_013852	Ca_01423	1.2221	0.0045	XLOC_018664	Ca_08528	-2.60663	5e-05	XLOC_015403	Ca_01667,Ca_01668	1.43152	0.0057	XLOC_014333	Ca_04204	-2.0892	0.0032	XLOC_006339	Ca_22513	1.81699	0.0331	XLOC_015811	Ca_03870	-1.14636	0.0379
XLOC_004411	Ca_16115	1.21738	0.00465	XLOC_004428	Ca_12518	-2.60533	5e-05	XLOC_023785	-	1.42744	0.00365	XLOC_025926	-	-2.08176	0.00175	XLOC_012123	Ca_14821	1.81636	0.0037	XLOC_019349	Ca_17493	-1.13949	0.0464
XLOC_021065	-	1.21683	0.0459	XLOC_022305	Ca_06685	-2.60495	0.03675	XLOC_010956	Ca_12094	1.42727	0.0164	XLOC_013580	Ca_04981	-2.08113	0.00015	XLOC_025042	Ca_11522	1.81411	0.01855	XLOC_025345	-	-1.13744	0.02205
XLOC_007240	Ca_01004	1.21527	0.00205	XLOC_023377	Ca_16441	-2.60253	0.0003	XLOC_003636	Ca_12605	1.42585	0.00265	XLOC_023851	Ca_11820	-2.08006	5e-05	XLOC_006622	-	1.81269	0.0008	XLOC_000109	Ca_27556	-1.13642	0.0168
XLOC_022549	Ca_09346	1.21398	0.03005	XLOC_014165	Ca_03894	-2.59828	5e-05	XLOC_012398	-	1.41793	0.04675	XLOC_001602	Ca_22669	-2.07745	0.0153	XLOC_009155	Ca_12116	1.81199	0.04365	XLOC_015251	Ca_04980	-1.12906	0.04215
XLOC_011708	Ca_18637	1.21323	0.02985	XLOC_005704	Ca_10238	-2.59596	5e-05	XLOC_010741	Ca_10801	1.41605	0.0036	XLOC_011843	Ca_14452	-2.07168	0.0001	XLOC_024906	Ca_23578	1.80703	0.0103	XLOC_008713	Ca_01122	-1.11998	0.03865
XLOC_008374	Ca_12223	1.21128	0.0113	XLOC_008087	Ca_06010	-2.59439	5e-05	XLOC_018660	Ca_08534	1.41071	0.0488	XLOC_003493	-	-2.07077	0.0331	XLOC_023919	Ca_02410	1.79862	0.0042	XLOC_010358	Ca_15135	-1.11626	0.02675
XLOC_009101	Ca_07816	1.20484	0.0108	XLOC_016298	Ca_10354	-2.58766	5e-05	XLOC_001471	Ca_21689	1.40713	0.01905	XLOC_025670	Ca_24282	-2.07038	0.0478	XLOC_024901	Ca_01934	1.79835	0.00675	XLOC_006752	Ca_08259	-1.11457	0.04595
XLOC_010451	Ca_14911	1.20322	0.0375	XLOC_000306	Ca_00310	-2.58702	5e-05	XLOC_022932	Ca_19906	1.40609	0.01	XLOC_026460	Ca_27539	-2.06593	0.0084	XLOC_024599	Ca_11869	1.79382	0.0265	XLOC_000203	Ca_00114	-1.1097	0.0351
XLOC_002120	Ca_07930	1.20112	0.00865	XLOC_023887	Ca_15031	-2.58504	5e-05	XLOC_024753	Ca_02245	1.40271	0.0235	XLOC_014895	Ca_15625	-2.06339	0.0372	XLOC_013104	Ca_24492	1.79036	0.01055	XLOC_004157	Ca_24546	-1.10908	0.03285
XLOC_008305	Ca_07298	1.19845	0.045	XLOC_016236	Ca_13279	-2.57696	5e-05	XLOC_024043	Ca_02161	1.40035	0.0086	XLOC_023161	Ca_10057	-2.06137	0.0147	XLOC_021563	Ca_10035	1.78419	0.0007	XLOC_014571	Ca_23791	-1.10871	0.0237
XLOC_002166	Ca_08034	1.19629	0.03015	XLOC_017352	Ca_24014	-2.56811	5e-05	XLOC_027405	Ca_27125,Ca_27126	1.39353	0.0021	XLOC_024590	Ca_11885	-2.04936	0.0159	XLOC_016546	Ca_16943	1.77991	0.00695	XLOC_014940	Ca_08956	-1.09654	0.0368
XLOC_009558	Ca_04355	1.19591	0.00525	XLOC_022453	Ca_15299	-2.55936	5e-05	XLOC_023557	-	1.38914	0.0113	XLOC_001016	Ca_06963	-2.04532	0.00605	XLOC_024859	-	1.77984	0.01975	XLOC_012239	Ca_14897	-1.09207	0.0253
XLOC_007473	Ca_22154	1.19485	0.0149	XLOC_019741	Ca_17734	-2.55183	0.00495	XLOC_024546	Ca_15538	1.38904	0.0023	XLOC_016236	Ca_13279	-2.04478	0.00015	XLOC_007221	Ca_00957	1.77478	0.008	XLOC_019409	Ca_16465	-1.09002	0.033
XLOC_001182	-	1.19461	0.00205	XLOC_026972	Ca_25390	-2.54856	5e-05	XLOC_004508	Ca_10279	1.38879	0.02825	XLOC_023907	Ca_02438	-2.04448	0.04605	XLOC_026236	Ca_22597	1.77166	0.02695	XLOC_022184	Ca_03016	-1.08262	0.03055
XLOC_007726	Ca_22494	1.19276	0.00355	XLOC_012708	-	-2.54827	0.00065	XLOC_021558	Ca_10045	1.38848	0.002	XLOC_020497	Ca_03226	-2.04163	5e-05	XLOC_026683	-	1.76872	0.0469	XLOC_010034	Ca_14469	-1.08192	0.03755
XLOC_011855	Ca_14415	1.18832	0.0065	XLOC_011188	Ca_03481,Ca_03482	-2.53091	5e-05	XLOC_017440	Ca_17474	1.38757	0.00355	XLOC_010870	Ca_07753	-2.03412	0.0485	XLOC_012153	Ca_15134	1.7672	0.0108	XLOC_003302	Ca_25714	-1.06893	0.04
XLOC_017152	Ca_16364	1.1865	0.00405	XLOC_016772	Ca_23425	-2.52876	5e-05	XLOC_008738	Ca_01160	1.38739	0.00495	XLOC_013640	Ca_01844	-2.03342	5e-05	XLOC_026904	-	1.76314	0.00445	XLOC_001156	Ca_08856	-1.06785	0.03285
XLOC_006510	Ca_09437	1.18502	0.0321	XLOC_013722	Ca_01675	-2.52517	0.00745	XLOC_017275	Ca_11116	1.3862	0.00505	XLOC_025482	Ca_28086	-2.02813	0.01795	XLOC_016012	Ca_04271	1.76159	0.0015	XLOC_024538	Ca_15518	-1.0668	0.02245
XLOC_012278	Ca_10980	1.1813	0.00715	XLOC_008358	Ca_12185	-2.52097	5e-05	XLOC_002440	Ca_02456	1.38531	0.0058	XLOC_009354	Ca_03546	-2.02446	0.01815	XLOC_016461	Ca_05777	1.76042	0.0196	XLOC_027544	Ca_24892	-1.0663	0.0377
XLOC_024847	Ca_02055	1.18129	0.01095	XLOC_003442	-	-2.51608	5e-05	XLOC_030336	Ca_27195	1.38236	0.00605	XLOC_014075	Ca_11317	-2.02407	5e-05	XLOC_008081	Ca_06019	1.75422	0.01815	XLOC_011172	Ca_03515	-1.06591	0.02835
XLOC_007248	Ca_01017	1.17895	0.0021	XLOC_018633	Ca_08588	-2.51352	5e-05	XLOC_009668	Ca_04569	1.38222	0.0087	XLOC_020683	Ca_06769	-2.02384	5e-05	XLOC_021031	Ca_09225	1.75289	0.00015	XLOC_000126	Ca_27980	-1.06396	0.03085
XLOC_010336	Ca_14819	1.17866	0.0031	XLOC_027765	Ca_25576	-2.50945	0.0008	XLOC_021240	Ca_12326	1.37873	0.02325	XLOC_028529	-	-2.02373	0.00885	XLOC_001372	Ca_22562	1.75171	0.0453	XLOC_014104	Ca_12729	-1.06323	0.04355
XLOC_013512	Ca_04856	1.17819	0.0124	XLOC_019794	Ca_13527	-2.5072	5e-05	XLOC_017107	Ca_06525	1.37813	0.00865	XLOC_018617	Ca_08613	-2.0229	0.0037	XLOC_021766	Ca_19581	1.75093	0.00155	XLOC_003278	Ca_13533	-1.06249	0.02775
XLOC_008190	Ca_08149	1.17801	0.04015	XLOC_007221	Ca_00957	-2.504	5e-05	XLOC_023568	Ca_22539	1.37633	0.00525	XLOC_015490	Ca_01497	-2.02251	5e-05	XLOC_016916	Ca_05273	1.75073	0.0103	XLOC_015304	Ca_01872	-1.06237	0.04645
XLOC_021637	Ca_17608	1.17724	0.0063	XLOC_025927	-	-2.50157	0.00015	XLOC_008349	-	1.37622	0.00135	XLOC_003860	Ca_18112	-2.02181	0.005	XLOC_008103	Ca_05985	1.75017	0.00665	XLOC_002027	Ca_00573	-1.06041	0.0441
XLOC_021061	Ca_16051	1.17366	0.00335	XLOC_013946	Ca_07536	-2.50069	5e-05	XLOC_026224	Ca_22581	1.37213	0.0015	XLOC_009420	Ca_03423	-2.01969	0.00975	XLOC_012274	Ca_10994	1.74834	0.00065	XLOC_013836	-	-1.06023	0.0302
XLOC_005681	-	1.17289	0.01285	XLOC_006120	Ca_22380	-2.50037	5e-05	XLOC_022590	Ca_09243	1.37199	0.0018	XLOC_020196	-	-2.01816	0.00065	XLOC_013782	Ca_01563	1.74826	0.00535	XLOC_000687	Ca_02839	-1.05905	0.0465
XLOC_005469	Ca_15638	1.17216	0.00305	XLOC_005612	Ca_12499	-2.50014	5e-05	XLOC_001897	Ca_00306	1.37103	0.00145	XLOC_024888	Ca_01961	-2.01372	5e-05	XLOC_012193	Ca_13108	1.74795	0.0216	XLOC_005573	Ca_16109	-1.05765	0.03535
XLOC_020964	Ca_09341	1.17163	0.01185	XLOC_011178	Ca_03501	-2.49968	5e-05	XLOC_012274	Ca_10994	1.36894	0.00095	XLOC_009766	Ca_05576	-2.0137	0.00015	XLOC_018043	Ca_17413	1.74236	0.00145	XLOC_020462	Ca_03285	-1.04558	0.03505
XLOC_002473	Ca_14104	1.16894	0.00885	XLOC_019379	Ca_17448	-2.49515	5e-05	XLOC_026574	Ca_24038	1.36792	0.0034	XLOC_013782	Ca_01563	-2.00846	0.0041	XLOC_005620	Ca_12485	1.74116	0.0339	XLOC_024948	Ca_10672	-1.04259	0.03535
XLOC_019718	Ca_13874	1.16871	0.0026	XLOC_018160	Ca_13252	-2.49218	5e-05	XLOC_012484	-	1.36698	0.0481	XLOC_004128	Ca_16001	-2.0046	5e-05	XLOC_014915	Ca_09017	1.74009	0.0276	XLOC_002349	Ca_02659	-1.02943	0.04525
XLOC_015132	Ca_04749	1.16833	0.00335	XLOC_016146	-	-2.49033	5e-05	XLOC_017048	Ca_06420	1.36659	0.00405	XLOC_003718	-	-2.00447	0.00925	XLOC_020334	-	1.73856	0.02815	XLOC_010335	Ca_14822	-1.02759	0.0224
XLOC_013654	Ca_01810	1.16746	0.00705	XLOC_008283	Ca_07256	-2.4828	0.00235	XLOC_005698	-	1.36628	0.0199	XLOC_018275	Ca_10435	-1.99131	0.00235	XLOC_023175	Ca_10020	1.73589	0.00055	XLOC_027278	-	-1.02716	0.04905
XLOC_012877	Ca_18730	1.16577	0.00505	XLOC_012218	Ca_13066	-2.47896	0.02075	XLOC_009436	Ca_08341	1.36622	0.0012	XLOC_009010	-	-1.99013	0.02465	XLOC_015631	Ca_07569,Ca_07570	1.73392	0.00285	XLOC_018803	Ca_05191	-1.02337	0.04965
XLOC_017047	Ca_06418	1.16094	0.01945	XLOC_003460	-	-2.47652	5e-05	XLOC_022021	Ca_03337	1.36414	0.00285	XLOC_008939	-	-1.98794	0.00125	XLOC_030305	Ca_23414	1.72789	0.0277	XLOC_011430	Ca_04470	-1.01571	0.0473
XLOC_020724	Ca_06699	1.16005	0.00895	XLOC_005973	-	-2.47092	0.0041	XLOC_014944	Ca_08949,Ca_08950,Ca_08951	1.36323	0.0451	XLOC_008492	Ca_20882	-1.98646	0.0003	XLOC_018686	Ca_20489	1.72144	0.0433	XLOC_018516	Ca_09603	-1.01444	0.0382
XLOC_023764	-	1.15959	0.04255	XLOC_029893	Ca_27014	-2.47039	0.00015	XLOC_002616	Ca_06916	1.36209	0.01225	XLOC_002675	Ca_14752	-1.98562	0.0005	XLOC_015569	Ca_07431	1.72018	0.0023	XLOC_019290	Ca_16706	-1.0133	0.0444
XLOC_005881	Ca_09822	1.15956	0.0085	XLOC_008132	Ca_08273	-2.46314	0.0181	XLOC_004691	Ca_09772	1.36093	0.0043	XLOC_022928	Ca_19912	-1.98439	5e-05	XLOC_003303	Ca_25716	1.71598	0.00425	XLOC_030184	Ca_24733	-1.01319	0.0395
XLOC_012037	Ca_15478	1.15807	0.04035	XLOC_022928	Ca_19912	-2.46177	5e-05	XLOC_007186	Ca_00872	1.35994	0.005	XLOC_019330	Ca_14576	-1.97973	5e-05	XLOC_007275	Ca_01069	1.71448	0.0276	XLOC_001898	Ca_00307	-1.00503	0.0351
XLOC_020362	-	1.15704	0.0241	XLOC_010695	Ca_19253	-2.46042	0.00095	XLOC_029735	-	1.3506	0.03145	XLOC_025982	-	-1.97935	0.00955	XLOC_029802	Ca_21770	1.70845	0.01375	XLOC_002462	Ca_14088	-1.0015	0.0365
XLOC_019063	Ca_06579	1.15529	0.0299	XLOC_020807	Ca_13187	-2.45412	5e-05	XLOC_000576	Ca_07999	1.35022	0.0107	XLOC_012482	Ca_10850	-1.97142	0.00065	XLOC_015290	Ca_01899	1.70665	0.008	XLOC_010467	Ca_14883	-1.00092	0.04605
XLOC_015303	Ca_01877	1.15233	0.03375	XLOC_019640	Ca_23155	-2.45313	5e-05	XLOC_029665	Ca_19943	1.34885	0.0468	XLOC_022806	Ca_12352	-1.96978	0.00325	XLOC_009621	Ca_04471	1.70271	0.0219
XLOC_025066	-	1.15074	0.00475	XLOC_010662	Ca_18364	-2.44796	5e-05	XLOC_014658	Ca_20815	1.34837	0.0075	XLOC_004635	Ca_16852	-1.96349	0.0077	XLOC_008085	Ca_06015	1.69927	0.003
XLOC_008414	-	1.14973	0.01155	XLOC_021751	Ca_16414	-2.44567	5e-05	XLOC_025190	-	1.34325	0.00365	XLOC_008946	-	-1.95615	0.01505	XLOC_011618	Ca_05501	1.69912	0.04265
XLOC_016739	Ca_08522	1.14869	0.0081	XLOC_008909	-	-2.44101	5e-05	XLOC_005697	-	1.33952	0.0148	XLOC_009491	Ca_08448	-1.95552	5e-05	XLOC_007330	Ca_01189	1.69414	0.02535
XLOC_002587	Ca_06977	1.14857	0.0032	XLOC_010911	Ca_07837	-2.43535	5e-05	XLOC_026230	Ca_22590	1.33836	0.01055	XLOC_027765	Ca_25576	-1.95397	0.0479	XLOC_018074	Ca_13665,Ca_13666	1.69287	0.0014
XLOC_012462	Ca_19275	1.14675	0.04775	XLOC_017006	Ca_06332	-2.42619	5e-05	XLOC_004995	Ca_19144	1.33823	0.0134	XLOC_010914	Ca_07840	-1.94172	0.00025	XLOC_025119	Ca_16835	1.69255	0.00935
XLOC_002841	Ca_19283	1.14674	0.0251	XLOC_020172	-	-2.42509	0.00205	XLOC_002918	Ca_20296	1.33809	0.0039	XLOC_000508	Ca_00698	-1.93968	0.0001	XLOC_010695	Ca_19253	1.68557	0.04735
XLOC_020467	Ca_03278	1.14255	0.0054	XLOC_005919	-	-2.41975	0.00305	XLOC_025058	Ca_11548	1.33783	0.0455	XLOC_013409	Ca_16640	-1.93629	0.00135	XLOC_012963	Ca_23747	1.68353	0.0013
XLOC_017989	-	1.14229	0.0094	XLOC_015463	Ca_01557	-2.4172	5e-05	XLOC_009326	Ca_03600	1.33632	0.04345	XLOC_011200	Ca_03455	-1.93493	5e-05	XLOC_025822	Ca_26366	1.67946	0.00355
XLOC_002655	Ca_22784	1.13907	0.0144	XLOC_009683	Ca_04587	-2.41451	0.0017	XLOC_023666	-	1.33608	0.014	XLOC_004467	Ca_12435	-1.93432	0.0009	XLOC_010493	Ca_11007	1.67882	0.0013
XLOC_010815	Ca_07664	1.13895	0.00435	XLOC_028099	Ca_20596	-2.41402	0.0002	XLOC_017650	Ca_15914	1.33516	0.03035	XLOC_020222	-	-1.92905	0.0006	XLOC_007519	Ca_22089	1.67337	0.0322
XLOC_006912	Ca_07306	1.13877	0.01525	XLOC_015428	Ca_01612	-2.40781	5e-05	XLOC_012188	Ca_13115	1.33221	0.00335	XLOC_016637	Ca_16783	-1.92098	5e-05	XLOC_004899	Ca_10454	1.67325	0.011
XLOC_019768	-	1.13825	0.04585	XLOC_010647	Ca_09211	-2.40726	0.0431	XLOC_017990	-	1.33219	0.01325	XLOC_009765	Ca_05578	-1.91973	0.00195	XLOC_008079	Ca_06021	1.67237	0.0024
XLOC_018128	Ca_15426	1.13717	0.0062	XLOC_001628	Ca_13579	-2.40574	5e-05	XLOC_013652	Ca_01816	1.33151	0.0454	XLOC_000923	Ca_14147	-1.91931	0.0228	XLOC_004992	Ca_19151	1.665	0.00125
XLOC_019294	Ca_16712	1.13374	0.028	XLOC_030915	Ca_21401	-2.40556	5e-05	XLOC_011295	-	1.33132	0.0225	XLOC_020518	Ca_03181	-1.91837	0.0007	XLOC_011341	Ca_04303	1.65832	0.00315
XLOC_015292	Ca_01897	1.13236	0.0144	XLOC_012466	Ca_19258	-2.39777	0.01765	XLOC_008006	Ca_06156	1.32953	0.0112	XLOC_021370	Ca_19895	-1.91811	5e-05	XLOC_014869	Ca_17652	1.65741	0.02185
XLOC_003182	Ca_18447	1.13119	0.00685	XLOC_016914	Ca_05270	-2.39399	0.00025	XLOC_022641	Ca_09981	1.3258	0.0024	XLOC_004177	Ca_23047	-1.91808	5e-05	XLOC_022490	Ca_12763	1.65635	0.0099
XLOC_024970	Ca_10634	1.13076	0.01775	XLOC_004325	Ca_17266	-2.39188	5e-05	XLOC_001123	Ca_17387	1.32466	0.0038	XLOC_023215	-	-1.90823	0.0136	XLOC_016811	Ca_05058	1.6556	0.00475
XLOC_009988	Ca_19047	1.12964	0.01585	XLOC_010899	Ca_07806	-2.39103	5e-05	XLOC_021630	Ca_20982	1.32347	0.0071	XLOC_024872	Ca_01998	-1.90656	0.0406	XLOC_024319	-	1.65404	0.0267
XLOC_029274	Ca_25909	1.12922	0.00655	XLOC_010255	Ca_15496	-2.39101	5e-05	XLOC_022601	Ca_16023	1.32021	0.017	XLOC_024905	Ca_01929	-1.90619	0.00015	XLOC_013717	Ca_01687	1.64948	0.0066
XLOC_007813	Ca_21133	1.12769	0.0058	XLOC_005915	-	-2.39086	0.0291	XLOC_000917	Ca_14138	1.32017	0.0018	XLOC_022515	Ca_12821	-1.90545	0.0003	XLOC_024570	Ca_11919	1.64712	0.00695
XLOC_015319	Ca_01839	1.12578	0.0143	XLOC_009735	Ca_05641	-2.38552	5e-05	XLOC_008284	Ca_07257	1.32017	0.0084	XLOC_023661	-	-1.90036	0.03105	XLOC_015717	Ca_11381	1.64571	0.01145
XLOC_015169	Ca_04814	1.12072	0.03465	XLOC_000659	Ca_02903	-2.3846	0.0056	XLOC_024049	Ca_02150	1.32004	0.00815	XLOC_030489	-	-1.89902	0.00065	XLOC_016395	Ca_05895	1.64538	0.03405
XLOC_028503	Ca_25711	1.12048	0.00685	XLOC_005148	Ca_18066	-2.38129	0.00875	XLOC_002182	Ca_08061	1.32002	0.02955	XLOC_030916	Ca_21402	-1.89805	0.0002	XLOC_024140	Ca_01983	1.63969	0.0066
XLOC_024761	Ca_02226	1.11655	0.00625	XLOC_011843	Ca_14452	-2.37791	0.0001	XLOC_000865	Ca_02491	1.31754	0.0083	XLOC_008363	Ca_12199	-1.8973	0.0274	XLOC_004128	Ca_16001	1.6357	0.0109
XLOC_002255	Ca_02834	1.11208	0.01925	XLOC_016642	Ca_16770	-2.37642	5e-05	XLOC_009557	Ca_04353	1.31378	0.0064	XLOC_003578	-	-1.89614	0.00355	XLOC_024691	Ca_02374	1.62714	0.0019
XLOC_001001	Ca_06989	1.10997	0.0059	XLOC_019068	-	-2.37415	5e-05	XLOC_019999	Ca_17397	1.31364	0.0478	XLOC_000836	Ca_02547	-1.89589	0.00345	XLOC_027703	Ca_26079	1.62097	0.00235
XLOC_007732	Ca_17022	1.1088	0.00635	XLOC_027077	Ca_23267	-2.37331	5e-05	XLOC_007248	Ca_01017	1.31108	0.0057	XLOC_000215	Ca_00136	-1.88936	0.0001	XLOC_019892	Ca_22917	1.6209	0.01515
XLOC_023434	Ca_20274	1.10752	0.00725	XLOC_004505	Ca_10284	-2.37247	0.00035	XLOC_006266	Ca_18820	1.30912	0.0027	XLOC_002551	Ca_07050	-1.88689	0.00065	XLOC_024674	Ca_02412	1.61579	0.0143
XLOC_023684	-	1.10614	0.012	XLOC_001263	Ca_22361	-2.3718	5e-05	XLOC_019061	Ca_06577	1.30788	0.0348	XLOC_011949	Ca_23178	-1.88503	0.0001	XLOC_020537	Ca_03143	1.61349	0.01975
XLOC_003914	Ca_20029	1.10607	0.00705	XLOC_013782	Ca_01563	-2.36623	5e-05	XLOC_022442	Ca_15322	1.307	0.00145	XLOC_012720	-	-1.88033	0.00015	XLOC_021558	Ca_10045	1.60982	0.00105
XLOC_016819	Ca_05073	1.10467	0.00645	XLOC_027703	Ca_26079	-2.36485	5e-05	XLOC_013585	Ca_04991	1.3068	0.00285	XLOC_007804	Ca_23331	-1.88021	0.0028	XLOC_005405	Ca_24906	1.60633	0.00745
XLOC_011063	Ca_03757	1.10228	0.03025	XLOC_010870	Ca_07753	-2.36317	0.0417	XLOC_014176	Ca_03911	1.30355	0.03265	XLOC_017565	-	-1.87989	5e-05	XLOC_019732	Ca_17750	1.60368	0.00165
XLOC_022563	Ca_09321	1.1016	0.0247	XLOC_008991	-	-2.36293	0.03765	XLOC_002347	Ca_02663	1.30314	0.0078	XLOC_013624	Ca_01873	-1.87872	0.0075	XLOC_008078	Ca_06022	1.60204	0.0312
XLOC_022505	Ca_12787	1.09462	0.04035	XLOC_017156	Ca_16356	-2.36173	0.00015	XLOC_022153	Ca_03081	1.30308	0.032	XLOC_000250	Ca_00195	-1.87772	0.0199	XLOC_018789	Ca_05169	1.6003	0.0021
XLOC_017480	Ca_16480	1.09442	0.00495	XLOC_001640	Ca_13561	-2.35874	0.00095	XLOC_001844	Ca_00193	1.2992	0.02475	XLOC_017136	Ca_06582	-1.87627	0.00015	XLOC_029353	Ca_21186	1.5975	0.0136
XLOC_001420	Ca_19433	1.09416	0.03405	XLOC_030489	-	-2.35776	5e-05	XLOC_029862	Ca_24744	1.29482	0.04365	XLOC_007925	Ca_09520	-1.87539	0.0002	XLOC_000916	Ca_14130	1.59687	0.00865
XLOC_013589	Ca_04997	1.09332	0.0236	XLOC_006002	-	-2.35584	0.04205	XLOC_023305	Ca_13759	1.2909	0.0279	XLOC_011717	Ca_18654	-1.87274	0.0012	XLOC_028663	Ca_24506	1.59512	0.03965
XLOC_020790	Ca_13228	1.08861	0.019	XLOC_021559	Ca_10044	-2.35453	5e-05	XLOC_018681	Ca_20479	1.29083	0.00535	XLOC_010413	-	-1.86977	0.0023	XLOC_028913	Ca_22284	1.59428	0.00155
XLOC_008284	Ca_07257	1.08709	0.0211	XLOC_023997	Ca_02255	-2.35393	0.0087	XLOC_018680	Ca_20478	1.28364	0.00365	XLOC_019842	-	-1.86949	0.00015	XLOC_022591	Ca_09242	1.59202	0.0111
XLOC_013582	Ca_04982	1.08702	0.0075	XLOC_002064	Ca_00649	-2.35254	5e-05	XLOC_016284	Ca_10324	1.28237	0.0196	XLOC_000790	Ca_02631	-1.86275	0.0015	XLOC_008706	Ca_01099	1.58968	0.00615
XLOC_015562	Ca_07423	1.08273	0.0067	XLOC_024640	Ca_15040	-2.34949	5e-05	XLOC_005502	Ca_15682	1.28167	0.00655	XLOC_005910	-	-1.8624	0.0328	XLOC_007514	Ca_22081	1.58794	0.01915
XLOC_007139	Ca_00772	1.08188	0.0407	XLOC_020978	Ca_09313	-2.34835	5e-05	XLOC_019799	Ca_13520	1.28161	0.00235	XLOC_016455	Ca_05787	-1.86143	0.0001	XLOC_008738	Ca_01160	1.58533	0.00235
XLOC_018644	Ca_08560	1.0813	0.0111	XLOC_008570	Ca_00843	-2.34664	5e-05	XLOC_010274	Ca_20355	1.28134	0.0032	XLOC_015291	Ca_01898	-1.84893	0.0009	XLOC_003749	Ca_10445	1.57937	0.00385
XLOC_020872	Ca_17306	1.08112	0.02675	XLOC_021126	Ca_09931	-2.33922	5e-05	XLOC_012278	Ca_10980	1.2795	0.0149	XLOC_027113	Ca_26002	-1.84645	0.0017	XLOC_018811	Ca_05204	1.57909	0.0222
XLOC_010623	Ca_09166	1.07907	0.01565	XLOC_021598	Ca_16157	-2.33417	5e-05	XLOC_014084	Ca_11306	1.27846	0.00195	XLOC_011105	Ca_03652	-1.84464	5e-05	XLOC_008361	Ca_12195	1.57824	0.01575
XLOC_002510	Ca_07126	1.07853	0.0422	XLOC_029411	Ca_25361	-2.33146	0.04165	XLOC_009700	Ca_04624	1.27516	0.0162	XLOC_011387	Ca_04383	-1.84459	0.0004	XLOC_005030	Ca_18145	1.57633	0.0083
XLOC_010895	Ca_07800	1.07817	0.0132	XLOC_015509	Ca_01455	-2.33113	5e-05	XLOC_029198	Ca_23805	1.27463	0.0445	XLOC_017326	Ca_11028	-1.84428	0.00175	XLOC_014199	Ca_03951	1.57607	0.03215
XLOC_004839	Ca_10561	1.0775	0.0074	XLOC_020548	Ca_03123	-2.32932	5e-05	XLOC_006319	Ca_22686	1.27328	0.04605	XLOC_016909	Ca_05262	-1.84198	0.00075	XLOC_008966	-	1.57224	0.0188
XLOC_004695	Ca_09781	1.07748	0.0293	XLOC_020138	-	-2.32539	0.0002	XLOC_005695	Ca_10259,Ca_10261	1.27102	0.0054	XLOC_024726	Ca_02311	-1.84108	5e-05	XLOC_005824	Ca_09692	1.57208	0.00415
XLOC_024207	Ca_10694	1.07678	0.0062	XLOC_002745	-	-2.324	5e-05	XLOC_010125	Ca_20437	1.26835	0.0252	XLOC_022592	Ca_09241	-1.83945	0.0015	XLOC_013761	Ca_01616	1.57116	0.02195
XLOC_017144	Ca_16379	1.07609	0.01515	XLOC_000219	Ca_00143	-2.31694	5e-05	XLOC_014179	Ca_03915	1.26624	0.0103	XLOC_020860	Ca_17324	-1.83919	0.00175	XLOC_024143	Ca_01977	1.56949	0.01145
XLOC_018814	-	1.07571	0.04235	XLOC_009281	Ca_03682	-2.31454	0.0003	XLOC_023910	Ca_02431	1.26597	0.00265	XLOC_021751	Ca_16414	-1.83828	5e-05	XLOC_004995	Ca_19144	1.56912	0.00645
XLOC_008177	Ca_08178	1.0756	0.01145	XLOC_023063	Ca_11737	-2.31356	5e-05	XLOC_010878	Ca_07768	1.26462	0.0267	XLOC_002444	Ca_02453	-1.83823	0.0043	XLOC_004748	Ca_16990,Ca_16992	1.56884	0.0046
XLOC_009954	Ca_14053	1.07385	0.02675	XLOC_012369	Ca_09101	-2.31355	0.0363	XLOC_004647	Ca_09700	1.26232	0.03145	XLOC_007765	Ca_18261	-1.83659	5e-05	XLOC_004622	Ca_16882	1.56869	0.0195
XLOC_007577	Ca_16514	1.07344	0.0118	XLOC_011653	Ca_05422	-2.31086	0.01235	XLOC_028045	Ca_24394,Ca_24396	1.26165	0.00765	XLOC_011842	Ca_14453	-1.83568	0.00475	XLOC_015403	Ca_01667,Ca_01668	1.56706	0.0123
XLOC_011789	Ca_17152	1.07292	0.02625	XLOC_003802	Ca_19687	-2.31002	0.0008	XLOC_017255	-	1.25982	0.00315	XLOC_005483	Ca_15658	-1.83353	0.0087	XLOC_024502	Ca_12957	1.56368	0.03485
XLOC_019906	Ca_18891	1.07179	0.01995	XLOC_018927	Ca_06299	-2.30927	0.00015	XLOC_000281	Ca_00258	1.25888	0.0428	XLOC_017352	Ca_24014	-1.83176	0.00015	XLOC_026658	Ca_25147	1.56297	0.0034
XLOC_013789	Ca_01551	1.07055	0.0344	XLOC_020691	Ca_06750	-2.3081	5e-05	XLOC_026447	Ca_24874	1.25867	0.00475	XLOC_023100	Ca_23326	-1.83096	0.001	XLOC_028045	Ca_24394,Ca_24396	1.5606	0.01045
XLOC_002509	Ca_07127	1.06989	0.0073	XLOC_024726	Ca_02311	-2.30641	5e-05	XLOC_028119	Ca_20600	1.2586	0.01375	XLOC_020179	-	-1.82672	0.0378	XLOC_017275	Ca_11116	1.55944	0.007
XLOC_022781	Ca_12310	1.06907	0.025	XLOC_006637	Ca_06157	-2.30502	0.0001	XLOC_019444	Ca_15190	1.25657	0.0035	XLOC_011485	Ca_04573	-1.82556	0.0496	XLOC_023268	Ca_17767	1.55759	0.0207
XLOC_015216	Ca_04900	1.06896	0.04255	XLOC_017208	Ca_11261	-2.30314	5e-05	XLOC_002952	Ca_18506	1.25628	0.0027	XLOC_023223	Ca_16196	-1.82351	0.00935	XLOC_011484	Ca_04566	1.55556	0.0017
XLOC_024589	Ca_11888	1.06518	0.0163	XLOC_013442	Ca_04706	-2.30301	5e-05	XLOC_021712	Ca_13752	1.25106	0.0059	XLOC_006374	Ca_17049,Ca_17050	-1.82212	0.02445	XLOC_006496	-	1.555	0.0485
XLOC_001402	Ca_21857	1.06458	0.02635	XLOC_008953	-	-2.29876	0.03205	XLOC_022438	Ca_15333	1.25085	0.01765	XLOC_022165	Ca_03051	-1.8206	0.0086	XLOC_006637	Ca_06157	1.55486	0.01065
XLOC_018127	Ca_15425	1.06288	0.01825	XLOC_001944	Ca_00409	-2.29816	0.0001	XLOC_029871	Ca_24750,Ca_24751	1.24875	0.02095	XLOC_000219	Ca_00143	-1.8201	0.0004	XLOC_023579	Ca_22555	1.55227	0.0116
XLOC_016238	Ca_13284	1.06269	0.0455	XLOC_019924	-	-2.29627	0.0001	XLOC_019311	Ca_14621	1.24864	0.0103	XLOC_003384	Ca_12857	-1.81906	0.00085	XLOC_023290	Ca_13726	1.54798	0.00185
XLOC_004243	Ca_22903	1.06044	0.00655	XLOC_012620	-	-2.29591	0.01665	XLOC_016810	Ca_05057	1.24752	0.00285	XLOC_014194	Ca_03943	-1.81847	0.0002	XLOC_017531	Ca_15224	1.54531	0.00485
XLOC_020665	Ca_06808	1.06035	0.02	XLOC_006867	Ca_07199	-2.29423	5e-05	XLOC_010021	Ca_20137	1.24426	0.0035	XLOC_009068	Ca_07755	-1.81603	0.0081	XLOC_021742	Ca_16384	1.545	0.0058
XLOC_024448	Ca_22734	1.05943	0.0106	XLOC_009009	-	-2.29251	0.02225	XLOC_000082	-	1.24363	0.04045	XLOC_027511	Ca_21892	-1.81399	5e-05	XLOC_007663	Ca_19392	1.54376	0.0047
XLOC_006852	Ca_07176	1.05877	0.01225	XLOC_008990	-	-2.2908	0.00055	XLOC_008442	Ca_12005	1.24272	0.0354	XLOC_013732	Ca_01655	-1.81308	0.0004	XLOC_022702	Ca_09875	1.54332	0.0291
XLOC_017374	Ca_16711	1.05832	0.04755	XLOC_026402	Ca_21997	-2.28913	5e-05	XLOC_017587	-	1.24178	0.01905	XLOC_018344	Ca_05873	-1.81003	0.00325	XLOC_023085	Ca_11697	1.54008	0.0482
XLOC_009883	Ca_05355	1.05827	0.01385	XLOC_015781	Ca_12690	-2.28462	5e-05	XLOC_001140	Ca_17359	1.24138	0.00995	XLOC_000773	Ca_02660	-1.8092	0.00105	XLOC_004456	Ca_12457	1.53922	0.0048
XLOC_005442	Ca_14311	1.05729	0.0097	XLOC_011619	Ca_05499	-2.28406	5e-05	XLOC_013507	Ca_04848	1.24091	0.03465	XLOC_025464	Ca_27052	-1.80882	0.00085	XLOC_018835	Ca_05250,Ca_05251	1.53714	0.03945
XLOC_005512	Ca_14394	1.05708	0.01315	XLOC_000309	Ca_00313	-2.284	5e-05	XLOC_019885	Ca_17547	1.23909	0.00215	XLOC_021583	Ca_10010	-1.80668	0.0003	XLOC_008990	-	1.53601	0.0445
XLOC_020312	-	1.05568	0.00775	XLOC_013769	Ca_01586	-2.28225	0.0004	XLOC_021601	Ca_16163	1.2347	0.00255	XLOC_009596	Ca_04420	-1.80471	0.00715	XLOC_005386	Ca_21666	1.53513	0.00185
XLOC_001886	Ca_00281	1.05289	0.00995	XLOC_022408	Ca_13168	-2.28131	5e-05	XLOC_015984	Ca_04232	1.2344	0.02425	XLOC_008322	Ca_07338	-1.80267	0.0018	XLOC_022399	Ca_13184	1.53476	0.007
XLOC_007948	Ca_06274	1.05134	0.02825	XLOC_001945	Ca_00410	-2.27828	0.00065	XLOC_020808	Ca_13185	1.2336	0.0075	XLOC_015509	Ca_01455	-1.80246	5e-05	XLOC_011166	Ca_03533	1.53472	0.00535
XLOC_021268	Ca_12396	1.04956	0.01505	XLOC_008931	-	-2.27775	0.04045	XLOC_017095	Ca_06499	1.23253	0.00415	XLOC_025299	Ca_15526	-1.80108	0.00265	XLOC_018374	Ca_05813	1.53424	0.0289
XLOC_022313	Ca_06675	1.04931	0.0083	XLOC_008078	Ca_06022	-2.27761	0.00035	XLOC_018663	Ca_08529	1.23205	0.0194	XLOC_019892	Ca_22917	-1.79681	0.0001	XLOC_007998	Ca_06179	1.53288	0.0083
XLOC_017417	Ca_14577	1.04889	0.04295	XLOC_023663	-	-2.27613	5e-05	XLOC_022163	Ca_03066	1.22975	0.02255	XLOC_009586	Ca_04406	-1.79526	0.00035	XLOC_016994	Ca_06313	1.53024	0.0204
XLOC_018755	Ca_05106	1.04873	0.00735	XLOC_008895	-	-2.27497	0.00185	XLOC_023952	Ca_02333	1.22962	0.03115	XLOC_000378	Ca_00437	-1.79447	0.02795	XLOC_002616	Ca_06916	1.52777	0.00735
XLOC_021055	Ca_16048	1.04813	0.0184	XLOC_001272	Ca_19302	-2.27043	0.0007	XLOC_024026	Ca_02186	1.22935	0.019	XLOC_008754	Ca_01180	-1.7917	0.00035	XLOC_021794	Ca_20254	1.52777	0.0048
XLOC_008349	-	1.04764	0.00825	XLOC_001033	Ca_06923	-2.26614	0.0001	XLOC_014616	Ca_23356	1.22932	0.00485	XLOC_018381	Ca_05805	-1.79092	0.0186	XLOC_019991	-	1.52633	0.01135
XLOC_017230	Ca_11225	1.04507	0.0227	XLOC_018277	Ca_10440	-2.26562	0.00015	XLOC_003332	Ca_25111	1.22801	0.03425	XLOC_000344	Ca_00374	-1.79032	0.00525	XLOC_001551	Ca_18451	1.52628	0.04405
XLOC_010549	Ca_10893	1.04443	0.0307	XLOC_020618	Ca_02990	-2.26433	5e-05	XLOC_011051	Ca_03778	1.22798	0.0035	XLOC_007207	Ca_00933	-1.79015	0.0318	XLOC_005856	Ca_09773	1.52424	0.00325
XLOC_020626	Ca_02967	1.04377	0.00665	XLOC_016036	-	-2.26355	0.0006	XLOC_007211	Ca_00939	1.22613	0.004	XLOC_018387	Ca_05789	-1.78927	0.00025	XLOC_001855	Ca_00220	1.52421	0.00395
XLOC_003476	-	1.04376	0.02405	XLOC_012622	-	-2.26343	0.00045	XLOC_017374	Ca_16711	1.22484	0.04325	XLOC_006885	Ca_07230	-1.78807	0.001	XLOC_008062	Ca_06047	1.52121	0.0025
XLOC_009129	Ca_12061	1.04351	0.02945	XLOC_023650	-	-2.25874	5e-05	XLOC_016560	Ca_09675	1.2235	0.04035	XLOC_001272	Ca_19302	-1.78365	0.00245	XLOC_017156	Ca_16356	1.51997	0.0254
XLOC_017223	Ca_11235	1.04276	0.01835	XLOC_029081	Ca_22205	-2.2545	5e-05	XLOC_013282	Ca_09011	1.2225	0.00545	XLOC_021027	Ca_09233	-1.78348	0.0256	XLOC_023365	Ca_16421	1.51935	0.0205
XLOC_024122	Ca_02012	1.04262	0.0085	XLOC_011341	Ca_04303	-2.25306	0.0001	XLOC_002752	-	1.22148	0.0035	XLOC_007225	Ca_00969	-1.78256	0.0002	XLOC_009657	Ca_04545	1.51707	0.02785
XLOC_017929	Ca_17527	1.04155	0.0283	XLOC_016057	-	-2.25234	0.01365	XLOC_006964	Ca_07400	1.2212	0.0073	XLOC_000945	Ca_07110	-1.78105	0.0021	XLOC_021695	Ca_13721	1.51703	0.0053
XLOC_009490	Ca_08447	1.03981	0.0176	XLOC_016455	Ca_05787	-2.24686	5e-05	XLOC_024147	Ca_01971	1.22015	0.0094	XLOC_024573	Ca_11914	-1.77988	0.01055	XLOC_004538	Ca_10239	1.51617	0.0079
XLOC_008191	Ca_08148	1.03781	0.01145	XLOC_022605	Ca_16032	-2.24663	0.00145	XLOC_017953	Ca_22925	1.21927	0.016	XLOC_030591	Ca_22190	-1.77741	0.044	XLOC_028915	Ca_22289	1.51327	0.03825
XLOC_002721	Ca_17340	1.03668	0.04395	XLOC_022806	Ca_12352	-2.24355	0.0003	XLOC_021854	Ca_25033	1.2176	0.0203	XLOC_009294	Ca_03661	-1.77697	0.00075	XLOC_024334	Ca_18412	1.51278	0.04555
XLOC_019551	Ca_19813	1.03418	0.00905	XLOC_015025	Ca_13380	-2.23744	5e-05	XLOC_012474	Ca_19241	1.21669	0.0392	XLOC_015897	Ca_04052	-1.77685	0.00465	XLOC_005705	Ca_10237	1.51272	0.02255
XLOC_023240	-	1.03408	0.0145	XLOC_020870	Ca_17309	-2.23694	5e-05	XLOC_029734	Ca_26785	1.21409	0.004	XLOC_007418	Ca_01369	-1.76831	0.0003	XLOC_020405	Ca_03393	1.51193	0.00235
XLOC_009545	Ca_04315	1.03137	0.0078	XLOC_004987	Ca_20947	-2.23456	5e-05	XLOC_030455	Ca_22417	1.21345	0.0036	XLOC_003479	-	-1.76578	0.025	XLOC_007179	Ca_00861	1.5117	0.03615
XLOC_022840	Ca_12407	1.02978	0.01025	XLOC_010484	Ca_23903	-2.23434	0.0005	XLOC_024605	Ca_11861	1.21312	0.004	XLOC_004372	Ca_14364	-1.76452	0.0032	XLOC_009712	Ca_04648	1.51093	0.03475
XLOC_023101	Ca_23325	1.02871	0.01685	XLOC_024909	Ca_23585	-2.23065	5e-05	XLOC_002157	Ca_08007	1.21301	0.0483	XLOC_016178	-	-1.76404	0.001	XLOC_014084	Ca_11306	1.50544	0.0019
XLOC_020051	Ca_13668	1.02772	0.0096	XLOC_001868	Ca_00247	-2.22844	0.00265	XLOC_026069	Ca_21439	1.21288	0.0257	XLOC_011619	Ca_05499	-1.76336	0.0015	XLOC_001206	-	1.50484	0.0182
XLOC_026012	-	1.02693	0.04835	XLOC_009468	Ca_08403	-2.22754	5e-05	XLOC_010549	Ca_10893	1.21236	0.0291	XLOC_026524	Ca_26882	-1.76297	0.002	XLOC_026763	Ca_20803	1.50227	0.0066
XLOC_007069	Ca_12047	1.02337	0.01575	XLOC_015532	-	-2.2245	0.02055	XLOC_015430	Ca_01610	1.21166	0.0106	XLOC_024051	Ca_02146	-1.76253	0.00025	XLOC_025798	Ca_23734	1.49615	0.01435
XLOC_023932	Ca_02383	1.02255	0.04195	XLOC_004122	Ca_16014	-2.22427	0.0003	XLOC_012646	-	1.20995	0.0348	XLOC_024081	Ca_02088	-1.76227	0.0049	XLOC_022412	Ca_13165	1.49448	0.0088
XLOC_006509	Ca_09436	1.01835	0.0127	XLOC_017396	Ca_14615	-2.22163	0.01265	XLOC_010900	Ca_07808	1.20952	0.0109	XLOC_020618	Ca_02990	-1.76099	0.00045	XLOC_027305	Ca_20919	1.49127	0.03605
XLOC_000616	Ca_08073	1.01628	0.0192	XLOC_024224	Ca_10666	-2.22152	5e-05	XLOC_004027	Ca_11680	1.20772	0.006	XLOC_015314	Ca_01854	-1.75811	0.00275	XLOC_024278	Ca_11471	1.48883	0.0078
XLOC_014405	Ca_26282	1.016	0.01225	XLOC_024073	Ca_02100	-2.21885	0.003	XLOC_024476	Ca_13008	1.20747	0.01245	XLOC_023956	Ca_02320	-1.75536	0.0017	XLOC_004405	Ca_16126	1.48714	0.00985
XLOC_003792	Ca_14648	1.01264	0.0388	XLOC_003135	Ca_13970	-2.21436	5e-05	XLOC_022406	Ca_13173	1.20695	0.0258	XLOC_005853	Ca_09768	-1.75516	0.0242	XLOC_028729	Ca_26528	1.48504	0.02195
XLOC_028414	-	1.01235	0.0451	XLOC_020957	Ca_09357	-2.21045	0.00015	XLOC_020502	Ca_03214	1.20645	0.00725	XLOC_022408	Ca_13168	-1.75466	0.00025	XLOC_021652	Ca_17639	1.48342	0.00655
XLOC_008785	Ca_01230	1.01133	0.0126	XLOC_000218	Ca_00142	-2.2102	5e-05	XLOC_011229	Ca_08315	1.2032	0.0041	XLOC_004428	Ca_12518	-1.75315	0.00285	XLOC_015208	Ca_04885	1.48301	0.0106
XLOC_011439	Ca_04489	1.01114	0.02905	XLOC_000371	Ca_00425	-2.20933	5e-05	XLOC_017747	-	1.20193	0.04755	XLOC_016442	Ca_05815	-1.74983	0.00105	XLOC_009638	Ca_04504	1.47968	0.0444
XLOC_004009	Ca_18074	1.0099	0.0327	XLOC_023806	Ca_11898	-2.20917	5e-05	XLOC_013968	Ca_07586	1.20155	0.0309	XLOC_000589	Ca_08020	-1.74071	0.00045	XLOC_023587	-	1.47933	0.0117
XLOC_007920	Ca_09509	1.0092	0.0353	XLOC_012123	Ca_14821	-2.20686	5e-05	XLOC_020810	Ca_13177	1.20086	0.0159	XLOC_026062	Ca_21450	-1.73967	0.02825	XLOC_000518	Ca_07899	1.47884	0.01115
XLOC_015162	Ca_04807	1.00682	0.0285	XLOC_022285	-	-2.20414	0.00835	XLOC_001911	Ca_00337	1.20071	0.00535	XLOC_016413	Ca_05863	-1.7387	0.00025	XLOC_020698	Ca_06736	1.47865	0.04995
XLOC_027816	Ca_22270	1.00578	0.02335	XLOC_024905	Ca_01929	-2.20057	5e-05	XLOC_022482	Ca_12751	1.20066	0.0069	XLOC_008196	-	-1.73854	0.04945	XLOC_011157	Ca_03556	1.47822	0.0065
XLOC_010797	Ca_20772	1.0042	0.0441	XLOC_002094	Ca_00701	-2.19811	5e-05	XLOC_027602	Ca_25016	1.19978	0.04955	XLOC_000202	Ca_00112	-1.73437	0.0128	XLOC_022401	Ca_13182	1.47724	0.01275
XLOC_011106	-	1.00407	0.02895	XLOC_015290	Ca_01899	-2.1949	0.0001	XLOC_028216	Ca_20525	1.19962	0.01665	XLOC_022750	Ca_15858	-1.73097	0.00105	XLOC_017389	Ca_14633	1.47716	0.0084
XLOC_015517	Ca_01445	1.00338	0.01	XLOC_013826	Ca_01477	-2.19306	5e-05	XLOC_003749	Ca_10445	1.19851	0.0153	XLOC_029081	Ca_22205	-1.72792	0.00055	XLOC_026224	Ca_22581	1.47641	0.00225
XLOC_009928	Ca_14000	1.00311	0.0111	XLOC_012275	Ca_10989	-2.19107	0.00045	XLOC_014088	Ca_11302	1.19843	0.01725	XLOC_019438	Ca_15181	-1.7226	0.0443	XLOC_010914	Ca_07840	1.47602	0.02395
XLOC_019173	-	1.00294	0.01155	XLOC_002675	Ca_14752	-2.18586	5e-05	XLOC_012156	Ca_15125	1.19833	0.00565	XLOC_017035	Ca_06395	-1.71783	0.0118	XLOC_016727	Ca_08551	1.47447	0.0083
XLOC_010246	Ca_15475	1.00199	0.0282	XLOC_015569	Ca_07431	-2.18093	5e-05	XLOC_024974	Ca_10626	1.19646	0.00475	XLOC_020360	-	-1.7178	0.03195	XLOC_009334	Ca_03589	1.47403	0.021
				XLOC_014057	Ca_11360	-2.17789	0.0044	XLOC_000518	Ca_07899	1.19385	0.0176	XLOC_011178	Ca_03501	-1.71697	0.0012	XLOC_004227	Ca_14938	1.47277	0.01975
				XLOC_004074	Ca_18562	-2.17474	0.03795	XLOC_022154	Ca_03080	1.19203	0.0036	XLOC_020479	Ca_03255	-1.71693	0.00305	XLOC_017906	Ca_19171	1.47247	0.01155
				XLOC_024807	Ca_02138	-2.16989	0.00775	XLOC_005681	-	1.18558	0.0144	XLOC_002660	Ca_14781	-1.71462	0.00055	XLOC_005461	Ca_17273	1.4724	0.0147
				XLOC_008103	Ca_05985	-2.16431	5e-05	XLOC_015912	Ca_04082	1.18537	0.0066	XLOC_005704	Ca_10238	-1.71342	0.0005	XLOC_000917	Ca_14138	1.46845	0.0025
				XLOC_012584	-	-2.16252	0.0168	XLOC_019678	Ca_24241	1.18335	0.007	XLOC_002064	Ca_00649	-1.71307	0.00565	XLOC_021854	Ca_25033	1.4674	0.0069
				XLOC_003768	Ca_14696	-2.16152	5e-05	XLOC_003232	Ca_13619	1.18316	0.0177	XLOC_019349	Ca_17493	-1.71214	0.0081	XLOC_001907	Ca_00331	1.46446	0.0308
				XLOC_008081	Ca_06019	-2.15292	0.001	XLOC_011360	Ca_04334	1.18135	0.006	XLOC_020209	-	-1.7049	0.0014	XLOC_011178	Ca_03501	1.46414	0.02185
				XLOC_024149	Ca_01968	-2.15174	0.0018	XLOC_018580	Ca_08676	1.18079	0.0061	XLOC_020430	Ca_03341	-1.70434	0.0001	XLOC_002543	Ca_07061	1.46364	0.0049
				XLOC_026730	Ca_21083	-2.14916	0.00195	XLOC_015503	Ca_01465	1.1806	0.0037	XLOC_025334	-	-1.69567	0.0082	XLOC_022406	Ca_13173	1.46301	0.0138
				XLOC_002191	Ca_08086	-2.14703	0.0001	XLOC_005405	Ca_24906	1.17991	0.0274	XLOC_015424	Ca_01619	-1.69391	0.00035	XLOC_015476	Ca_01531	1.45885	0.00285
				XLOC_017234	Ca_11219	-2.14581	0.00295	XLOC_014850	Ca_17697,Ca_17698	1.17795	0.0065	XLOC_005505	Ca_15687	-1.69346	0.0018	XLOC_023992	Ca_02262	1.45689	0.02465
				XLOC_016153	-	-2.14427	0.004	XLOC_005059	-	1.17792	0.0282	XLOC_013416	Ca_16654	-1.68928	0.0492	XLOC_002918	Ca_20296	1.45638	0.00585
				XLOC_015566	Ca_07427	-2.13751	5e-05	XLOC_030912	Ca_21390	1.1756	0.04675	XLOC_015008	Ca_13411	-1.68882	0.00055	XLOC_018633	Ca_08588	1.45628	0.0088
				XLOC_020222	-	-2.13677	5e-05	XLOC_020332	-	1.17527	0.01825	XLOC_000530	Ca_07921	-1.68726	0.0016	XLOC_013262	Ca_15624	1.45101	0.0458
				XLOC_025667	Ca_24275	-2.13622	0.0004	XLOC_010660	Ca_18369	1.17504	0.0086	XLOC_002479	Ca_14111	-1.68534	0.00585	XLOC_017107	Ca_06525	1.45018	0.00795
				XLOC_014003	Ca_19234	-2.1359	0.00155	XLOC_012137	Ca_14797	1.1746	0.01965	XLOC_026233	Ca_22594	-1.68271	0.00255	XLOC_007474	Ca_22155	1.44973	0.03225
				XLOC_004648	Ca_09702	-2.13266	0.01155	XLOC_022744	Ca_15868	1.17225	0.0068	XLOC_013839	Ca_01453	-1.6811	0.00685	XLOC_006760	Ca_08251	1.44874	0.01755
				XLOC_001907	Ca_00331	-2.13258	5e-05	XLOC_010957	Ca_12095	1.16995	0.04055	XLOC_007254	Ca_01032	-1.6808	0.0161	XLOC_007985	Ca_06203	1.44403	0.0042
				XLOC_023186	Ca_09998	-2.12757	0.00045	XLOC_021615	Ca_21006	1.16954	0.00835	XLOC_009108	Ca_07829	-1.68047	0.02925	XLOC_011962	Ca_23703	1.44181	0.0046
				XLOC_015878	Ca_04016	-2.12724	5e-05	XLOC_005731	Ca_10186	1.16884	0.0071	XLOC_029539	Ca_25730	-1.67382	0.00185	XLOC_024058	Ca_02136	1.44027	0.02965
				XLOC_018417	Ca_05718	-2.12619	5e-05	XLOC_003978	Ca_27498	1.16869	0.0105	XLOC_001811	Ca_00125	-1.67165	0.0001	XLOC_030406	Ca_23370	1.43817	0.006
				XLOC_000570	Ca_07988	-2.12606	5e-05	XLOC_029274	Ca_25909	1.16832	0.01025	XLOC_004005	Ca_18069	-1.66952	0.002	XLOC_016300	Ca_10356	1.43753	0.0041
				XLOC_025334	-	-2.12567	0.0002	XLOC_023857	Ca_11813	1.16722	0.022	XLOC_003956	Ca_17581,Ca_17582	-1.66894	0.00125	XLOC_017155	Ca_16357	1.43541	0.0114
				XLOC_018387	Ca_05789	-2.12511	5e-05	XLOC_008403	Ca_12274	1.16705	0.03215	XLOC_014844	Ca_21976	-1.66852	0.0261	XLOC_004519	Ca_10266	1.43321	0.0087
				XLOC_019021	Ca_06496	-2.12474	0.01295	XLOC_009110	Ca_07832	1.16695	0.0325	XLOC_010333	Ca_14824	-1.66563	0.0458	XLOC_011434	Ca_04474	1.4321	0.0106
				XLOC_002798	Ca_20639	-2.12461	5e-05	XLOC_005746	Ca_10165	1.16415	0.0062	XLOC_009527	Ca_04282	-1.66491	0.00385	XLOC_021590	Ca_10000	1.43203	0.00345
				XLOC_008633	Ca_00954,Ca_00956	-2.12407	5e-05	XLOC_007565	-	1.16016	0.02995	XLOC_013571	Ca_04967	-1.66442	0.0007	XLOC_002453	Ca_14074	1.43099	0.0047
				XLOC_005483	Ca_15658	-2.12301	0.002	XLOC_015400	Ca_01677	1.16003	0.015	XLOC_001596	Ca_22534	-1.66434	0.0006	XLOC_025144	Ca_23839	1.42775	0.00815
				XLOC_014630	Ca_17107	-2.12233	5e-05	XLOC_021072	Ca_16067	1.15956	0.00635	XLOC_003362	Ca_12916	-1.66392	0.0006	XLOC_021200	Ca_15845	1.42618	0.0037
				XLOC_016811	Ca_05058	-2.12097	5e-05	XLOC_020604	Ca_03014	1.15951	0.04965	XLOC_005872	Ca_09807	-1.66072	0.003	XLOC_019388	Ca_24053	1.42449	0.0126
				XLOC_027511	Ca_21892	-2.12046	5e-05	XLOC_006912	Ca_07306	1.15341	0.0298	XLOC_012641	-	-1.65896	0.00045	XLOC_015974	Ca_04212	1.42335	0.0374
				XLOC_005461	Ca_17273	-2.12004	0.0001	XLOC_023971	Ca_02297	1.15185	0.0042	XLOC_020023	Ca_17440	-1.65806	0.00615	XLOC_008532	-	1.42005	0.0448
				XLOC_011297	Ca_08436	-2.11863	0.00025	XLOC_019259	Ca_26073	1.1505	0.02775	XLOC_014061	Ca_11350	-1.65635	0.0018	XLOC_029598	Ca_23921	1.41656	0.01085
				XLOC_025303	Ca_15531	-2.11731	0.0188	XLOC_000767	Ca_02670	1.14979	0.0328	XLOC_027689	-	-1.65317	0.0023	XLOC_002680	Ca_14738	1.41224	0.02225
				XLOC_018058	Ca_13704	-2.11683	0.0183	XLOC_007864	Ca_09383	1.14934	0.0204	XLOC_010168	Ca_23165	-1.65027	0.01185	XLOC_023129	Ca_10109	1.41168	0.0048
				XLOC_015796	Ca_12665	-2.11662	0.0001	XLOC_026904	-	1.14888	0.0234	XLOC_018624	Ca_08600	-1.6499	0.00505	XLOC_001140	Ca_17359	1.41104	0.0109
				XLOC_022591	Ca_09242	-2.11212	0.00025	XLOC_008640	Ca_00966	1.14717	0.03025	XLOC_020190	-	-1.64949	0.0062	XLOC_001527	Ca_13931	1.4088	0.0052
				XLOC_009527	Ca_04282	-2.10724	0.0006	XLOC_018950	Ca_06343	1.14533	0.00815	XLOC_018240	Ca_10350	-1.64772	0.00095	XLOC_020511	Ca_03197	1.40759	0.0071
				XLOC_000215	Ca_00136	-2.10703	5e-05	XLOC_016261	Ca_13334	1.14512	0.0374	XLOC_014905	-	-1.6449	0.03995	XLOC_001668	Ca_24435	1.40679	0.0055
				XLOC_015050	Ca_13344	-2.105	0.00025	XLOC_004698	Ca_09784	1.14497	0.00945	XLOC_002536	Ca_07070	-1.6443	0.00045	XLOC_015095	Ca_04688	1.40512	0.02355
				XLOC_020308	-	-2.10444	0.0239	XLOC_017155	Ca_16357	1.14333	0.02855	XLOC_008611	Ca_00913	-1.63944	0.00685	XLOC_010429	Ca_13060	1.40357	0.0139
				XLOC_023225	Ca_16199	-2.10442	0.00155	XLOC_028521	Ca_26027	1.14117	0.0082	XLOC_021789	Ca_24258	-1.63731	0.0003	XLOC_024290	Ca_11494	1.39975	0.0128
				XLOC_020382	Ca_20223	-2.10097	0.0001	XLOC_001691	Ca_25113	1.14111	0.0083	XLOC_005967	-	-1.63717	0.0099	XLOC_004848	Ca_10545	1.39959	0.0172
				XLOC_022675	Ca_09920	-2.10048	5e-05	XLOC_026202	Ca_19763	1.14101	0.023	XLOC_009824	Ca_05475	-1.6348	0.01685	XLOC_001174	-	1.39958	0.02525
				XLOC_015631	Ca_07569,Ca_07570	-2.09428	5e-05	XLOC_024570	Ca_11919	1.1404	0.0323	XLOC_008397	Ca_12265	-1.63115	0.0015	XLOC_012137	Ca_14797	1.39884	0.0109
				XLOC_026524	Ca_26882	-2.09167	5e-05	XLOC_002598	Ca_06953	1.14015	0.00715	XLOC_016443	Ca_05806	-1.63006	0.0032	XLOC_016021	-	1.39762	0.01095
				XLOC_014186	Ca_03926	-2.08983	0.0003	XLOC_003724	Ca_10504	1.13758	0.02095	XLOC_025927	-	-1.62839	0.0203	XLOC_028373	Ca_21803	1.39591	0.01355
				XLOC_006760	Ca_08251	-2.08718	5e-05	XLOC_020528	Ca_03163	1.13566	0.0115	XLOC_021598	Ca_16157	-1.62673	0.0019	XLOC_017316	Ca_11041	1.39448	0.0163
				XLOC_019457	Ca_15222	-2.08678	0.0445	XLOC_010115	Ca_25303	1.13534	0.01035	XLOC_022887	Ca_14559	-1.62411	0.00565	XLOC_005296	Ca_15967	1.39325	0.0448
				XLOC_014194	Ca_03943	-2.08386	5e-05	XLOC_022937	Ca_19891	1.13495	0.03265	XLOC_022061	Ca_03254	-1.62389	0.0069	XLOC_001809	Ca_00122	1.39135	0.02055
				XLOC_024064	Ca_02116	-2.0835	5e-05	XLOC_011024	Ca_03823	1.13468	0.0203	XLOC_023698	-	-1.6216	0.0093	XLOC_013612	-	1.3913	0.0173
				XLOC_018873	Ca_05325	-2.08103	5e-05	XLOC_024667	Ca_02423	1.13409	0.0332	XLOC_002481	Ca_14113	-1.62078	0.03355	XLOC_005631	Ca_12466	1.39048	0.0401
				XLOC_005829	Ca_09705	-2.08018	0.00025	XLOC_010448	Ca_14914	1.13399	0.00935	XLOC_028590	-	-1.61876	0.0065	XLOC_024846	Ca_02056	1.3869	0.00555
				XLOC_003677	Ca_10587	-2.0792	5e-05	XLOC_021794	Ca_20254	1.13369	0.0163	XLOC_000647	Ca_02924	-1.61482	0.0112	XLOC_017650	Ca_15914	1.38686	0.0321
				XLOC_012578	-	-2.07904	5e-05	XLOC_005074	Ca_25093	1.13327	0.00955	XLOC_002705	Ca_17375	-1.61357	0.00135	XLOC_012142	Ca_15153	1.38496	0.0079
				XLOC_013506	Ca_04847	-2.07774	5e-05	XLOC_011157	Ca_03556	1.13189	0.014	XLOC_020197	-	-1.6092	0.0008	XLOC_010560	Ca_23690	1.38292	0.0186
				XLOC_005824	Ca_09692	-2.07616	5e-05	XLOC_001979	Ca_00481	1.12945	0.0196	XLOC_002048	Ca_00605	-1.60793	0.03995	XLOC_018796	Ca_05181	1.38191	0.00635
				XLOC_027083	Ca_23259	-2.07424	5e-05	XLOC_002424	Ca_02499	1.12908	0.02195	XLOC_001176	-	-1.60756	0.01	XLOC_021033	Ca_09223	1.38145	0.0101
				XLOC_001240	Ca_20640	-2.07336	0.02185	XLOC_023029	Ca_11791	1.12587	0.00545	XLOC_006242	Ca_20968	-1.60716	0.00265	XLOC_003340	Ca_12948	1.37978	0.03415
				XLOC_012032	Ca_15467	-2.06813	5e-05	XLOC_027452	Ca_26621	1.12433	0.02745	XLOC_018664	Ca_08528	-1.60428	0.00285	XLOC_010580	Ca_09080	1.37757	0.01735
				XLOC_016634	Ca_09536	-2.06626	0.00025	XLOC_024334	Ca_18412	1.12302	0.01655	XLOC_003656	Ca_12564	-1.60392	0.01705	XLOC_017255	-	1.37732	0.00345
				XLOC_002680	Ca_14738	-2.06616	0.00055	XLOC_028130	Ca_27797	1.12246	0.04525	XLOC_011056	Ca_03768	-1.60226	0.0165	XLOC_018307	Ca_05936	1.3773	0.0318
				XLOC_020507	Ca_03206	-2.0654	0.00025	XLOC_019323	Ca_14590	1.12164	0.0143	XLOC_008835	Ca_01335	-1.6022	0.00075	XLOC_009807	Ca_05497	1.37636	0.0104
				XLOC_020363	-	-2.05734	5e-05	XLOC_000710	Ca_02788	1.1212	0.0108	XLOC_019820	Ca_13466	-1.59886	0.0008	XLOC_014627	Ca_17111	1.37576	0.00805
				XLOC_014289	Ca_04125	-2.0547	5e-05	XLOC_007296	Ca_01107	1.12111	0.03125	XLOC_027114	Ca_26003	-1.59848	0.0024	XLOC_019068	-	1.37285	0.009
				XLOC_010706	Ca_10862	-2.05315	5e-05	XLOC_008625	Ca_00936	1.12105	0.01715	XLOC_007023	Ca_12290	-1.59672	0.02115	XLOC_019114	Ca_19856	1.37267	0.02255
				XLOC_000461	Ca_00611	-2.04814	0.0001	XLOC_020551	Ca_03119	1.11681	0.01375	XLOC_017316	Ca_11041	-1.59603	0.00345	XLOC_010393	Ca_13135	1.3721	0.045
				XLOC_019842	-	-2.04711	5e-05	XLOC_023503	Ca_15711	1.1166	0.03395	XLOC_016170	-	-1.59509	0.00165	XLOC_020807	Ca_13187	1.37203	0.0318
				XLOC_005387	Ca_21663	-2.04555	5e-05	XLOC_006634	Ca_06161	1.11652	0.0127	XLOC_023954	Ca_02325	-1.593	0.00045	XLOC_019061	Ca_06577	1.36656	0.0337
				XLOC_005096	Ca_17579	-2.04547	0.0006	XLOC_020660	Ca_06816	1.11431	0.01085	XLOC_000599	Ca_08030	-1.59287	0.0006	XLOC_015945	Ca_04153	1.36633	0.011
				XLOC_011826	Ca_20129	-2.0443	0.029	XLOC_013292	Ca_08997	1.1131	0.01115	XLOC_023650	-	-1.58876	0.00225	XLOC_026796	-	1.365	0.03065
				XLOC_014153	Ca_03875	-2.04374	0.00235	XLOC_023485	Ca_25031	1.113	0.0424	XLOC_026061	Ca_21449	-1.5825	0.00555	XLOC_024388	Ca_16811	1.36251	0.00715
				XLOC_001210	-	-2.04348	0.0013	XLOC_004748	Ca_16990,Ca_16992	1.11284	0.0136	XLOC_019924	-	-1.58001	0.0036	XLOC_021480	Ca_11728	1.36125	0.0052
				XLOC_015888	Ca_04037	-2.04284	5e-05	XLOC_005628	Ca_12473	1.11098	0.01795	XLOC_004455	Ca_12458	-1.57653	0.0425	XLOC_015998	Ca_04252	1.35778	0.032
				XLOC_017064	Ca_06441	-2.04262	5e-05	XLOC_010580	Ca_09080	1.11074	0.03905	XLOC_009142	Ca_12085	-1.57608	0.00275	XLOC_005259	-	1.35752	0.01055
				XLOC_025138	Ca_16796	-2.04246	0.0034	XLOC_003894	Ca_22316	1.11033	0.01175	XLOC_027340	Ca_21263	-1.57527	0.00155	XLOC_002610	Ca_06931	1.35278	0.00955
				XLOC_019618	Ca_15950	-2.04073	0.00015	XLOC_000990	Ca_07020	1.10797	0.0183	XLOC_003680	Ca_10583	-1.5721	0.00345	XLOC_019885	Ca_17547	1.35258	0.00665
				XLOC_023735	-	-2.03812	0.0058	XLOC_003753	Ca_21101	1.10753	0.0121	XLOC_012546	Ca_20760	-1.57057	0.00545	XLOC_016723	Ca_08553	1.35256	0.0087
				XLOC_021033	Ca_09223	-2.03706	5e-05	XLOC_001309	Ca_25078	1.10738	0.0082	XLOC_006022	-	-1.57009	0.001	XLOC_020691	Ca_06750	1.35197	0.00785
				XLOC_028814	Ca_23626	-2.03673	5e-05	XLOC_007983	Ca_06206	1.10669	0.0137	XLOC_019909	Ca_18898	-1.56822	0.00385	XLOC_011847	Ca_14438	1.35054	0.0348
				XLOC_022258	Ca_06784	-2.03269	0.0063	XLOC_001422	Ca_19437	1.10594	0.02215	XLOC_019068	-	-1.56821	0.00995	XLOC_027405	Ca_27125,Ca_27126	1.35	0.0137
				XLOC_000945	Ca_07110	-2.03265	5e-05	XLOC_005578	Ca_16102	1.10431	0.0324	XLOC_019603	Ca_15917	-1.56768	0.01355	XLOC_018897	Ca_19680	1.3499	0.0394
				XLOC_017028	Ca_06380	-2.0271	0.00035	XLOC_002732	Ca_08858	1.10287	0.01365	XLOC_014315	Ca_04171	-1.56565	0.0004	XLOC_030922	Ca_21386	1.34974	0.03555
				XLOC_012716	-	-2.02395	5e-05	XLOC_021658	Ca_17647	1.10187	0.0348	XLOC_022119	Ca_03140	-1.56356	0.01985	XLOC_023910	Ca_02431	1.34907	0.0049
				XLOC_008647	Ca_00977	-2.02079	0.01265	XLOC_024922	Ca_10719	1.09982	0.01305	XLOC_021993	Ca_03381	-1.56305	0.00065	XLOC_012590	-	1.34769	0.01495
				XLOC_003860	Ca_18112	-2.01543	0.00585	XLOC_001047	Ca_06895	1.09887	0.01125	XLOC_027512	Ca_21896	-1.56188	0.0275	XLOC_003746	Ca_10450,Ca_10451	1.34767	0.03365
				XLOC_028408	Ca_24183	-2.0153	5e-05	XLOC_000310	Ca_00314	1.09866	0.00875	XLOC_023063	Ca_11737	-1.55965	0.00405	XLOC_027006	Ca_21719	1.34683	0.01125
				XLOC_024313	Ca_11551	-2.0142	0.0284	XLOC_004629	Ca_16869	1.09804	0.01095	XLOC_024690	Ca_02375	-1.55683	0.00125	XLOC_005628	Ca_12473	1.34617	0.00745
				XLOC_019197	Ca_11124	-2.01418	5e-05	XLOC_026246	-	1.09803	0.02685	XLOC_020476	Ca_03258	-1.55228	0.0021	XLOC_015715	Ca_11383	1.34341	0.01735
				XLOC_010417	Ca_13080	-2.00967	0.0286	XLOC_021226	Ca_12302	1.09705	0.01165	XLOC_030000	Ca_24338	-1.55224	0.00385	XLOC_015694	Ca_11425	1.34324	0.0269
				XLOC_008685	Ca_01059	-2.00694	0.00375	XLOC_020989	Ca_09295	1.09618	0.0375	XLOC_023468	Ca_20205	-1.54224	0.00315	XLOC_011302	Ca_08443	1.34213	0.016
				XLOC_020667	Ca_06804	-2.00414	5e-05	XLOC_024804	Ca_02148	1.09468	0.0148	XLOC_023687	-	-1.53998	0.02095	XLOC_011305	Ca_08462	1.34014	0.02785
				XLOC_004331	Ca_17280	-2.00354	0.0036	XLOC_001695	Ca_12939	1.09266	0.0418	XLOC_010254	-	-1.53923	0.02145	XLOC_013414	Ca_16648	1.34011	0.02375
				XLOC_024502	Ca_12957	-2.00124	0.0022	XLOC_025108	Ca_19746	1.09244	0.0405	XLOC_009468	Ca_08403	-1.53784	0.0014	XLOC_009436	Ca_08341	1.33901	0.005
				XLOC_021370	Ca_19895	-1.99877	5e-05	XLOC_027815	Ca_22268	1.09197	0.01195	XLOC_028225	Ca_20544	-1.53678	0.0016	XLOC_000283	Ca_00263	1.33609	0.04345
				XLOC_005996	-	-1.99765	0.01545	XLOC_009474	Ca_08414	1.09145	0.01075	XLOC_024541	Ca_15523	-1.53567	0.00155	XLOC_004178	Ca_23049	1.33384	0.04195
				XLOC_015717	Ca_11381	-1.98942	0.0008	XLOC_012004	Ca_14215	1.08917	0.0283	XLOC_010013	Ca_20150	-1.53405	0.00175	XLOC_021013	Ca_09261	1.33185	0.03045
				XLOC_018804	Ca_05195	-1.98769	0.0001	XLOC_009458	Ca_08374	1.08834	0.0112	XLOC_004566	Ca_10181	-1.53233	0.02435	XLOC_015334	Ca_01811	1.3315	0.02085
				XLOC_006114	Ca_21332	-1.98311	0.00505	XLOC_022486	Ca_12756	1.08785	0.01445	XLOC_025376	-	-1.53	0.00535	XLOC_021650	Ca_17632	1.33135	0.01035
				XLOC_020510	Ca_03200	-1.98307	0.0055	XLOC_021956	Ca_20240	1.08759	0.00825	XLOC_005686	Ca_10290	-1.52966	0.0014	XLOC_000368	Ca_00422	1.33116	0.0465
				XLOC_024074	Ca_02099	-1.98053	0.0251	XLOC_010902	Ca_07811	1.08727	0.0267	XLOC_020382	Ca_20223	-1.52906	0.00325	XLOC_019770	Ca_24609	1.32993	0.00745
				XLOC_002444	Ca_02453	-1.97716	0.0002	XLOC_009093	Ca_07801	1.08691	0.0167	XLOC_019703	Ca_13855	-1.52262	0.0039	XLOC_015781	Ca_12690	1.32917	0.0103
				XLOC_020639	Ca_06855	-1.97688	0.02365	XLOC_007295	Ca_01106	1.08414	0.0283	XLOC_017076	Ca_06465	-1.5213	0.0012	XLOC_001071	Ca_22780,Ca_22781	1.32854	0.01105
				XLOC_016637	Ca_16783	-1.97256	5e-05	XLOC_003772	Ca_14689	1.08393	0.0397	XLOC_006288	-	-1.52035	0.0413	XLOC_021712	Ca_13752	1.32732	0.00995
				XLOC_024731	Ca_02300	-1.96861	0.00175	XLOC_001182	-	1.08389	0.0116	XLOC_024295	Ca_11508	-1.51982	0.00065	XLOC_015397	Ca_01684	1.32601	0.0328
				XLOC_001070	Ca_22779	-1.96771	0.0001	XLOC_005514	Ca_14390	1.08054	0.0396	XLOC_025196	Ca_22726	-1.51954	0.0152	XLOC_014081	Ca_11310	1.32583	0.0248
				XLOC_022401	Ca_13182	-1.96606	0.00015	XLOC_002276	Ca_02796	1.08007	0.0431	XLOC_000687	Ca_02839	-1.51848	0.0003	XLOC_015503	Ca_01465	1.32578	0.012
				XLOC_008952	-	-1.96364	0.00465	XLOC_011475	Ca_04549	1.07733	0.0103	XLOC_014281	-	-1.51725	0.0032	XLOC_027887	Ca_22994	1.32481	0.0164
				XLOC_002337	Ca_02679	-1.9634	0.0003	XLOC_019770	Ca_24609	1.07522	0.0212	XLOC_011989	Ca_14187	-1.51566	0.01725	XLOC_011133	Ca_03601	1.32456	0.0289
				XLOC_011842	Ca_14453	-1.9616	0.00885	XLOC_016587	Ca_09627	1.07306	0.0103	XLOC_028145	-	-1.51481	0.00455	XLOC_022409	Ca_13167	1.32439	0.0408
				XLOC_021038	Ca_16020	-1.96002	0.04145	XLOC_007984	Ca_06204	1.07034	0.03515	XLOC_024310	Ca_11543	-1.51394	0.0072	XLOC_022691	Ca_09895	1.32328	0.0149
				XLOC_023651	-	-1.95761	5e-05	XLOC_008847	Ca_01367	1.0702	0.0101	XLOC_005992	-	-1.51333	0.0476	XLOC_011227	Ca_08312	1.32124	0.0136
				XLOC_027200	Ca_24715	-1.95572	0.0001	XLOC_018254	Ca_10376	1.06875	0.0274	XLOC_000350	Ca_00388	-1.51275	0.00545	XLOC_003875	Ca_18150	1.32089	0.0206
				XLOC_028590	-	-1.95374	0.00125	XLOC_005374	Ca_14960,Ca_14961	1.06738	0.0355	XLOC_001053	Ca_06887	-1.51245	0.00025	XLOC_022247	Ca_06810	1.32071	0.0139
				XLOC_010429	Ca_13060	-1.95129	5e-05	XLOC_023260	Ca_17646	1.06662	0.0174	XLOC_001904	Ca_00327	-1.50911	0.00195	XLOC_007211	Ca_00939	1.31784	0.0177
				XLOC_020346	-	-1.95066	5e-05	XLOC_024964	Ca_10642	1.06642	0.03325	XLOC_022451	Ca_15303	-1.50842	0.0008	XLOC_009576	Ca_04390	1.3154	0.022
				XLOC_015788	Ca_12678	-1.94772	0.00075	XLOC_013678	Ca_01762	1.06637	0.0197	XLOC_024151	Ca_01966	-1.50403	0.00025	XLOC_016810	Ca_05057	1.31351	0.00885
				XLOC_017809	-	-1.94614	0.0002	XLOC_030755	Ca_21054	1.06634	0.02015	XLOC_026244	Ca_22589	-1.50373	0.00185	XLOC_015462	Ca_01558	1.31285	0.007
				XLOC_021098	Ca_09983	-1.941	0.00015	XLOC_009558	Ca_04355	1.06613	0.0132	XLOC_021581	Ca_10013	-1.50236	0.0277	XLOC_010769	Ca_10750	1.31239	0.0102
				XLOC_023551	Ca_19474	-1.9369	0.00065	XLOC_001876	Ca_00265	1.06608	0.04195	XLOC_002788	-	-1.50031	0.0014	XLOC_004590	Ca_15242	1.31236	0.0388
				XLOC_020476	Ca_03258	-1.93653	5e-05	XLOC_030247	Ca_25238	1.06528	0.0127	XLOC_008570	Ca_00843	-1.49652	0.01255	XLOC_005074	Ca_25093	1.31074	0.0084
				XLOC_008079	Ca_06021	-1.93269	5e-05	XLOC_012102	Ca_14861	1.06501	0.04875	XLOC_008633	Ca_00954,Ca_00956	-1.49461	0.00145	XLOC_020716	Ca_06710	1.31005	0.0256
				XLOC_013571	Ca_04967	-1.93187	5e-05	XLOC_012029	Ca_15463	1.06488	0.01515	XLOC_009793	Ca_05519	-1.4932	0.0271	XLOC_022701	Ca_09876	1.30905	0.0126
				XLOC_008143	-	-1.9286	0.02195	XLOC_011766	Ca_14049	1.06379	0.0197	XLOC_008730	Ca_01150	-1.49298	0.00065	XLOC_021608	Ca_16186	1.30843	0.0157
				XLOC_019703	Ca_13855	-1.92513	0.00075	XLOC_001071	Ca_22780,Ca_22781	1.06325	0.0208	XLOC_009693	Ca_04610	-1.49089	0.00025	XLOC_024819	Ca_02119	1.30494	0.0148
				XLOC_009517	Ca_08487	-1.9242	0.00015	XLOC_004682	Ca_09759	1.06143	0.01875	XLOC_022070	Ca_03232	-1.48987	0.0032	XLOC_026447	Ca_24874	1.30139	0.0093
				XLOC_004628	Ca_16873	-1.92176	0.0005	XLOC_017962	Ca_18899	1.06122	0.01585	XLOC_011504	Ca_04620	-1.48827	0.0049	XLOC_029734	Ca_26785	1.30027	0.0102
				XLOC_010889	Ca_07791	-1.92085	0.0002	XLOC_008007	Ca_06152	1.06031	0.01055	XLOC_004045	Ca_11637	-1.48752	0.00535	XLOC_024667	Ca_02423	1.29836	0.0268
				XLOC_009354	Ca_03546	-1.92012	0.00255	XLOC_024207	Ca_10694	1.06013	0.02055	XLOC_003802	Ca_19687	-1.48747	0.0456	XLOC_002745	-	1.29784	0.02305
				XLOC_013990	Ca_07629	-1.91884	0.00035	XLOC_030584	Ca_22178	1.05838	0.0282	XLOC_013784	Ca_01556	-1.4858	0.015	XLOC_024111	Ca_02031	1.29694	0.01735
				XLOC_018862	Ca_05303	-1.91736	0.00075	XLOC_029206	Ca_22606	1.05763	0.01675	XLOC_005932	-	-1.48461	0.00035	XLOC_007983	Ca_06206	1.29563	0.0136
				XLOC_029262	Ca_27887	-1.91706	0.0011	XLOC_007792	Ca_24617	1.05696	0.01295	XLOC_021742	Ca_16384	-1.48276	0.018	XLOC_000742	Ca_02727	1.29343	0.01865
				XLOC_016471	Ca_05759	-1.91652	5e-05	XLOC_023240	-	1.05695	0.02135	XLOC_015802	Ca_12655	-1.48012	0.0041	XLOC_024605	Ca_11861	1.29261	0.00995
				XLOC_009738	Ca_05632	-1.91378	5e-05	XLOC_001420	Ca_19433	1.05541	0.04715	XLOC_003200	Ca_18485	-1.47982	0.00295	XLOC_001911	Ca_00337	1.28994	0.0143
				XLOC_011160	Ca_03551	-1.91253	0.00495	XLOC_008339	Ca_07372	1.05524	0.047	XLOC_019640	Ca_23155	-1.47928	0.0127	XLOC_018900	Ca_19676	1.28933	0.01305
				XLOC_008205	Ca_08124	-1.9125	5e-05	XLOC_000591	Ca_08021	1.05369	0.0473	XLOC_025576	Ca_17224	-1.4789	0.02665	XLOC_001422	Ca_19437	1.28739	0.0176
				XLOC_024756	Ca_02239	-1.91141	0.00015	XLOC_002267	Ca_02812	1.05366	0.04805	XLOC_019953	Ca_21197	-1.47845	0.0047	XLOC_004618	Ca_16891	1.28726	0.01495
				XLOC_022035	Ca_03310	-1.90907	0.00125	XLOC_014432	Ca_18684	1.05229	0.02085	XLOC_005095	Ca_17583	-1.47278	0.00275	XLOC_025300	Ca_15527	1.28664	0.01295
				XLOC_025925	-	-1.90814	0.032	XLOC_024567	Ca_11922	1.05208	0.031	XLOC_004325	Ca_17266	-1.47235	0.0037	XLOC_010338	Ca_14814	1.28429	0.0321
				XLOC_016569	Ca_09650	-1.90785	0.00035	XLOC_009576	Ca_04390	1.0504	0.048	XLOC_012424	Ca_09208	-1.47078	0.0009	XLOC_010474	Ca_14870	1.28213	0.0267
				XLOC_009773	Ca_05562	-1.90585	0.00015	XLOC_027682	Ca_25423	1.04991	0.01295	XLOC_009517	Ca_08487	-1.47049	0.0156	XLOC_016642	Ca_16770	1.28089	0.0104
				XLOC_012963	Ca_23747	-1.90423	5e-05	XLOC_025129	Ca_16809	1.04608	0.01405	XLOC_019902	Ca_18886,Ca_18887	-1.46907	0.0097	XLOC_012467	Ca_19256	1.28	0.01435
				XLOC_004372	Ca_14364	-1.90352	5e-05	XLOC_001065	Ca_22771	1.04569	0.04535	XLOC_001091	Ca_14762	-1.4671	0.0019	XLOC_019073	Ca_16370	1.27918	0.01215
				XLOC_019711	Ca_13864	-1.90321	5e-05	XLOC_012763	Ca_18200	1.04362	0.0334	XLOC_016129	-	-1.4669	0.0111	XLOC_026990	Ca_21706	1.27786	0.01165
				XLOC_029328	Ca_23574	-1.90077	0.0237	XLOC_020044	Ca_13682	1.04311	0.04675	XLOC_022160	Ca_03068	-1.46657	0.02765	XLOC_016623	Ca_09563	1.27771	0.0245
				XLOC_022490	Ca_12763	-1.89942	0.0008	XLOC_013818	Ca_01496	1.04288	0.0097	XLOC_008180	Ca_08168	-1.46563	0.02745	XLOC_014598	Ca_21231	1.27658	0.03215
				XLOC_016073	-	-1.89796	0.0499	XLOC_018361	Ca_05836	1.04278	0.01535	XLOC_008987	-	-1.46359	0.00505	XLOC_010591	Ca_09100	1.27643	0.0225
				XLOC_024670	Ca_02419	-1.89458	0.0075	XLOC_028913	Ca_22284	1.0424	0.0214	XLOC_023850	Ca_11821	-1.46218	0.00105	XLOC_004691	Ca_09772	1.27519	0.01535
				XLOC_011444	Ca_04495	-1.89335	0.0329	XLOC_015346	Ca_01787	1.04176	0.02775	XLOC_008130	Ca_08280	-1.45893	0.00825	XLOC_004792	Ca_12601	1.27266	0.0087
				XLOC_009068	Ca_07755	-1.89226	0.0009	XLOC_016832	Ca_05099	1.03937	0.0372	XLOC_008637	Ca_00963	-1.4581	0.0027	XLOC_020173	-	1.27023	0.03935
				XLOC_006622	-	-1.89199	5e-05	XLOC_021655	Ca_17642	1.03811	0.0316	XLOC_010486	Ca_23897	-1.45192	0.00055	XLOC_024965	Ca_10640	1.2696	0.02155
				XLOC_013174	Ca_21148	-1.89071	0.0004	XLOC_009449	Ca_08360	1.03742	0.019	XLOC_014275	Ca_04097	-1.45172	0.0306	XLOC_008358	Ca_12185	1.26889	0.00895
				XLOC_014111	Ca_12716	-1.89038	0.0003	XLOC_010665	Ca_18358	1.03615	0.01045	XLOC_002065	Ca_00654	-1.44963	0.016	XLOC_009914	Ca_21604	1.26717	0.0326
				XLOC_007925	Ca_09520	-1.88847	0.0003	XLOC_000154	Ca_00016	1.03506	0.0284	XLOC_010889	Ca_07791	-1.44442	0.00845	XLOC_013173	Ca_21151	1.26444	0.01125
				XLOC_004338	Ca_15641	-1.88199	5e-05	XLOC_018835	Ca_05250,Ca_05251	1.03462	0.04815	XLOC_004251	Ca_24909	-1.44333	0.0317	XLOC_019079	Ca_16358	1.26379	0.02245
				XLOC_023290	Ca_13726	-1.88024	5e-05	XLOC_000644	Ca_02928	1.03375	0.01505	XLOC_019879	Ca_17534	-1.43905	0.01565	XLOC_027083	Ca_23259	1.26188	0.0134
				XLOC_017567	-	-1.87981	0.00175	XLOC_007994	Ca_06186	1.03355	0.0249	XLOC_014940	Ca_08956	-1.43874	0.0007	XLOC_000962	Ca_07083	1.26155	0.0465
				XLOC_014177	Ca_03912	-1.87533	0.0003	XLOC_006198	Ca_16527	1.03254	0.04665	XLOC_013367	Ca_13400	-1.43835	0.00785	XLOC_014325	Ca_04191	1.25962	0.02575
				XLOC_012720	-	-1.8717	5e-05	XLOC_003974	Ca_25885	1.03165	0.04145	XLOC_003503	-	-1.43736	0.01425	XLOC_027819	Ca_22276	1.25868	0.01
				XLOC_017412	Ca_14587	-1.87156	0.0091	XLOC_011305	Ca_08462	1.03109	0.03275	XLOC_014720	Ca_22483	-1.43566	0.0394	XLOC_018699	Ca_25054	1.25855	0.0355
				XLOC_024051	Ca_02146	-1.87072	5e-05	XLOC_011855	Ca_14415	1.03109	0.02435	XLOC_030441	Ca_22420	-1.43342	0.0159	XLOC_011498	Ca_04604	1.25848	0.03405
				XLOC_030556	Ca_24592	-1.86781	0.00035	XLOC_001061	Ca_06865	1.03091	0.02935	XLOC_019443	Ca_15189	-1.43192	0.02855	XLOC_030524	Ca_23388	1.25836	0.02945
				XLOC_026572	Ca_24033	-1.86437	0.00055	XLOC_023898	Ca_02445	1.0302	0.02215	XLOC_016133	-	-1.43182	0.0313	XLOC_030789	Ca_25670	1.25605	0.0167
				XLOC_000965	Ca_07078	-1.86229	0.0174	XLOC_018671	Ca_08509	1.02814	0.01875	XLOC_015788	Ca_12678	-1.4276	0.0169	XLOC_024147	Ca_01971	1.25538	0.02955
				XLOC_005631	Ca_12466	-1.86211	0.0021	XLOC_011192	Ca_03466	1.02802	0.01815	XLOC_000883	Ca_02465	-1.42727	0.0006	XLOC_015796	Ca_12665	1.25533	0.03605
				XLOC_020845	Ca_15316	-1.85965	5e-05	XLOC_010700	Ca_19245	1.02746	0.03985	XLOC_029188	Ca_23799	-1.42667	0.011	XLOC_006756	Ca_08255	1.2526	0.0094
				XLOC_022907	-	-1.85689	5e-05	XLOC_024418	-	1.02684	0.02105	XLOC_017189	Ca_19858	-1.42634	0.00155	XLOC_008250	Ca_07198	1.25186	0.01175
				XLOC_003819	Ca_20934	-1.85683	0.00665	XLOC_015726	Ca_11358	1.025	0.0208	XLOC_008909	-	-1.42621	0.0016	XLOC_022731	Ca_20580	1.24945	0.0116
				XLOC_003685	Ca_10576	-1.85616	0.00255	XLOC_006968	Ca_12187	1.02488	0.0412	XLOC_024056	Ca_02141	-1.4243	0.03045	XLOC_021072	Ca_16067	1.2467	0.0106
				XLOC_016448	Ca_05797	-1.85606	0.0007	XLOC_023136	Ca_10100	1.02477	0.04065	XLOC_025561	Ca_17200	-1.42397	0.0007	XLOC_025258	Ca_12955	1.2446	0.01365
				XLOC_023223	Ca_16196	-1.85199	0.00165	XLOC_020496	Ca_03227	1.02428	0.0137	XLOC_015463	Ca_01557	-1.42369	0.0015	XLOC_009834	Ca_05457	1.24311	0.01585
				XLOC_000584	Ca_08010	-1.85185	5e-05	XLOC_011465	Ca_04534	1.02422	0.0211	XLOC_010548	Ca_10896	-1.42288	0.0453	XLOC_019917	Ca_18913	1.24209	0.01215
				XLOC_026613	Ca_26423	-1.8474	5e-05	XLOC_002805	Ca_20628	1.02407	0.0325	XLOC_006220	Ca_26571	-1.42244	0.0278	XLOC_012106	Ca_14854	1.24121	0.0331
				XLOC_002291	Ca_02766	-1.84634	0.00025	XLOC_021056	-	1.02346	0.0203	XLOC_016211	-	-1.42208	0.0011	XLOC_005746	Ca_10165	1.23883	0.01275
				XLOC_023175	Ca_10020	-1.84614	0.0001	XLOC_030406	Ca_23370	1.02256	0.0307	XLOC_025006	Ca_11458	-1.42136	0.00465	XLOC_017281	Ca_11109,Ca_11110	1.23796	0.0271
				XLOC_009739	Ca_05631	-1.84506	0.00045	XLOC_010749	Ca_10788	1.02244	0.0159	XLOC_002196	Ca_08097	-1.42051	0.018	XLOC_014276	Ca_04100	1.23746	0.0133
				XLOC_024859	-	-1.84369	0.0032	XLOC_001146	Ca_17347	1.02188	0.03955	XLOC_007859	Ca_19349	-1.42013	0.00175	XLOC_013826	Ca_01477	1.23734	0.02125
				XLOC_013982	-	-1.84277	0.00225	XLOC_029238	Ca_21727,Ca_21728	1.02108	0.0321	XLOC_005996	-	-1.41888	0.04165	XLOC_023971	Ca_02297	1.236	0.0224
				XLOC_005920	-	-1.84272	0.003	XLOC_028033	Ca_23466	1.02064	0.0145	XLOC_023551	Ca_19474	-1.41243	0.00465	XLOC_006438	Ca_19629	1.23514	0.0283
				XLOC_003438	-	-1.84117	0.01415	XLOC_028883	Ca_23551	1.01982	0.0277	XLOC_008877	-	-1.41077	0.0041	XLOC_020528	Ca_03163	1.23508	0.03085
				XLOC_019597	Ca_15911	-1.83591	0.0001	XLOC_022731	Ca_20580	1.01963	0.0249	XLOC_017149	Ca_16369	-1.41017	0.03465	XLOC_026244	Ca_22589	1.23306	0.03315
				XLOC_005740	Ca_10174	-1.83365	0.0002	XLOC_021174	Ca_20572	1.01637	0.03705	XLOC_023887	Ca_15031	-1.41012	0.0433	XLOC_020773	Ca_06594	1.2306	0.03965
				XLOC_003897	Ca_22312	-1.83096	0.0001	XLOC_001354	Ca_18516	1.01588	0.015	XLOC_006024	-	-1.40717	0.01695	XLOC_023816	Ca_11882	1.22893	0.0108
				XLOC_030413	Ca_23369	-1.82774	0.00895	XLOC_016492	Ca_05725	1.01309	0.0419	XLOC_010997	Ca_12164	-1.40094	0.0357	XLOC_000306	Ca_00310	1.22891	0.0336
				XLOC_008659	Ca_00999	-1.82543	5e-05	XLOC_007081	Ca_23666	1.01199	0.04015	XLOC_016067	-	-1.40085	0.01775	XLOC_007796	Ca_23344	1.22611	0.0134
				XLOC_022978	Ca_16223	-1.82222	0.01045	XLOC_008502	Ca_00702	1.01045	0.01785	XLOC_018684	Ca_20486	-1.39841	0.03965	XLOC_027223	-	1.22513	0.04345
				XLOC_016149	-	-1.81594	0.0157	XLOC_000478	Ca_00636	1.01023	0.01445	XLOC_016471	Ca_05759	-1.39702	0.005	XLOC_017028	Ca_06380	1.22352	0.04495
				XLOC_012482	Ca_10850	-1.81454	0.00085	XLOC_019934	Ca_16276,Ca_16277	1.00664	0.0261	XLOC_022102	Ca_03175	-1.39556	0.00855	XLOC_014950	Ca_08943	1.22256	0.01
				XLOC_011461	Ca_04528	-1.81368	0.00015	XLOC_015271	Ca_05014	1.00656	0.02105	XLOC_003254	Ca_13585	-1.39524	0.0159	XLOC_019517	Ca_15786	1.22124	0.0448
				XLOC_020686	Ca_06766	-1.81184	0.03755	XLOC_007732	Ca_17022	1.00633	0.018	XLOC_023221	Ca_16191	-1.39075	0.00885	XLOC_027682	Ca_25423	1.21765	0.0177
				XLOC_006438	Ca_19629	-1.81029	0.00095	XLOC_010412	Ca_13087	1.00553	0.029	XLOC_024887	Ca_01970	-1.39018	0.00325	XLOC_019141	Ca_11241	1.21665	0.0225
				XLOC_012641	-	-1.80899	5e-05	XLOC_019073	Ca_16370	1.00428	0.02095	XLOC_022022	Ca_03335	-1.38996	0.00145	XLOC_010219	Ca_14227	1.21138	0.0269
				XLOC_029487	Ca_26390,Ca_26392	-1.80673	0.005	XLOC_022124	Ca_03128	1.0041	0.0183	XLOC_007444	Ca_22642	-1.38884	0.0072	XLOC_015666	Ca_07635	1.20976	0.0255
				XLOC_018228	Ca_10331	-1.80385	0.0009	XLOC_017713	Ca_23252	1.00353	0.04485	XLOC_010093	Ca_16581	-1.37956	0.0087	XLOC_022156	Ca_03075	1.20805	0.029
				XLOC_021862	Ca_21358	-1.80301	0.00065	XLOC_011500	Ca_04608	1.00323	0.04715	XLOC_014138	Ca_12660	-1.37859	0.00795	XLOC_018322	Ca_05913	1.20788	0.02115
				XLOC_002389	Ca_02574	-1.79594	0.0004	XLOC_013906	-	1.003	0.0177	XLOC_009664	Ca_04564	-1.37816	0.0122	XLOC_007703	Ca_25319	1.20722	0.02725
				XLOC_016472	Ca_05758	-1.79428	0.00495	XLOC_000178	Ca_00065	1.00288	0.02355	XLOC_004406	Ca_16123	-1.37757	0.01075	XLOC_007864	Ca_09383	1.20682	0.02515
				XLOC_008059	Ca_06051,Ca_06053	-1.79031	0.0006	XLOC_025564	Ca_17204	1.00271	0.0356	XLOC_024292	Ca_11501	-1.3765	0.03425	XLOC_005502	Ca_15682	1.20667	0.0171
				XLOC_012590	-	-1.7883	0.0004	XLOC_025492	Ca_25976	1.00133	0.02555	XLOC_000777	Ca_02654	-1.36991	0.0238	XLOC_016709	Ca_08579	1.20532	0.022
				XLOC_007605	Ca_23725	-1.78689	0.01665	XLOC_018488	Ca_09666	1.00105	0.03085	XLOC_023651	-	-1.36604	0.0021	XLOC_009846	Ca_05436	1.20313	0.0146
				XLOC_024650	Ca_15022	-1.78685	0.00045	XLOC_021265	Ca_12391	1.00099	0.03635	XLOC_012554	Ca_20774	-1.36553	0.00525	XLOC_010021	Ca_20137	1.20278	0.01985
				XLOC_016866	Ca_05166	-1.78674	5e-05	XLOC_013867	Ca_01398	1.0003	0.0449	XLOC_023846	Ca_11826	-1.36499	0.0435	XLOC_014161	Ca_03889	1.20265	0.01835
				XLOC_004291	Ca_14297	-1.78538	0.00015					XLOC_010782	Ca_23015	-1.36424	0.00655	XLOC_019696	Ca_13839	1.20182	0.01525
				XLOC_020215	-	-1.78307	0.0333					XLOC_004046	Ca_11635	-1.36012	0.01085	XLOC_010900	Ca_07808	1.20128	0.03985
				XLOC_022231	Ca_06847	-1.77923	5e-05					XLOC_016866	Ca_05166	-1.35922	0.00485	XLOC_005585	Ca_16094	1.20106	0.02505
				XLOC_011387	Ca_04383	-1.77916	0.00045					XLOC_010025	Ca_20130	-1.3567	0.0088	XLOC_001263	Ca_22361	1.20084	0.02295
				XLOC_016426	Ca_05845	-1.77591	0.0002					XLOC_000111	Ca_27828	-1.35455	0.0022	XLOC_015505	Ca_01462	1.20077	0.0214
				XLOC_003215	Ca_22519	-1.77514	0.0004					XLOC_010092	Ca_16580	-1.35328	0.00605	XLOC_012716	-	1.19958	0.02325
				XLOC_020270	-	-1.77426	0.00895					XLOC_024669	Ca_02420	-1.35161	0.00385	XLOC_013506	Ca_04847	1.19952	0.02095
				XLOC_024192	Ca_10731	-1.77396	5e-05					XLOC_026943	-	-1.35105	0.00275	XLOC_001061	Ca_06865	1.19718	0.0242
				XLOC_014934	Ca_08975	-1.77386	5e-05					XLOC_024062	Ca_02124,Ca_02125	-1.35001	0.01445	XLOC_022509	Ca_12794	1.19647	0.02145
				XLOC_024674	Ca_02412	-1.77319	0.01					XLOC_016571	Ca_09648	-1.34778	0.0012	XLOC_019389	Ca_24049,Ca_24050	1.19616	0.0374
				XLOC_007827	Ca_19631	-1.77304	0.01905					XLOC_024152	Ca_01965	-1.3473	0.00415	XLOC_013442	Ca_04706	1.19556	0.0304
				XLOC_024395	Ca_16798	-1.77154	0.0102					XLOC_006249	Ca_18792	-1.34562	0.0022	XLOC_028935	Ca_18995	1.19495	0.03265
				XLOC_004588	Ca_15239	-1.77109	0.0023					XLOC_021862	Ca_21358	-1.34373	0.00185	XLOC_011674	Ca_05391	1.19347	0.0246
				XLOC_028373	Ca_21803	-1.77064	0.0001					XLOC_023806	Ca_11898	-1.34284	0.00125	XLOC_006634	Ca_06161	1.19156	0.02105
				XLOC_020741	Ca_06669	-1.77014	0.00135					XLOC_020537	Ca_03143	-1.34262	0.0061	XLOC_016587	Ca_09627	1.19024	0.0204
				XLOC_014325	Ca_04191	-1.76668	0.0004					XLOC_020507	Ca_03206	-1.34142	0.0086	XLOC_013203	Ca_21981	1.18667	0.0282
				XLOC_013732	Ca_01655	-1.76667	5e-05					XLOC_008169	Ca_08192	-1.34069	0.0096	XLOC_020861	Ca_17323	1.18597	0.02485
				XLOC_025163	-	-1.76422	0.0004					XLOC_006102	Ca_21344	-1.33933	0.0029	XLOC_023093	-	1.18397	0.0218
				XLOC_008532	-	-1.75965	0.0019					XLOC_016564	Ca_09663	-1.33778	0.00425	XLOC_022136	Ca_03108	1.18317	0.0375
				XLOC_024714	Ca_02336	-1.75786	0.00115					XLOC_017500	Ca_15166	-1.33512	0.00365	XLOC_013282	Ca_09011	1.18244	0.0147
				XLOC_016872	-	-1.75719	0.01115					XLOC_019395	Ca_16449	-1.33376	0.00545	XLOC_016413	Ca_05863	1.18176	0.02215
				XLOC_016211	-	-1.75466	5e-05					XLOC_006988	Ca_12222	-1.33336	0.00925	XLOC_024974	Ca_10626	1.18175	0.02395
				XLOC_020621	Ca_02983	-1.7546	0.00165					XLOC_006436	Ca_19626	-1.32889	0.00445	XLOC_008806	Ca_01274	1.18168	0.035
				XLOC_021073	Ca_16068	-1.75284	0.0005					XLOC_030524	Ca_23388	-1.32852	0.0102	XLOC_022932	Ca_19906	1.18159	0.04445
				XLOC_022828	Ca_12387	-1.75044	0.00045					XLOC_001070	Ca_22779	-1.32501	0.0053	XLOC_014088	Ca_11302	1.18138	0.0405
				XLOC_017389	Ca_14633	-1.75009	0.00015					XLOC_013418	Ca_16657	-1.32387	0.01365	XLOC_019013	Ca_06474	1.17919	0.02955
				XLOC_021652	Ca_17639	-1.74913	0.0001					XLOC_018276	Ca_10436	-1.3235	0.0033	XLOC_001047	Ca_06895	1.17876	0.01315
				XLOC_005992	-	-1.74859	0.0045					XLOC_015923	Ca_04106	-1.3224	0.00215	XLOC_004839	Ca_10561	1.17851	0.0255
				XLOC_002624	Ca_06902	-1.74845	0.00035					XLOC_003511	-	-1.32139	0.0335	XLOC_009255	Ca_03721	1.17567	0.0321
				XLOC_010795	Ca_20767	-1.74789	5e-05					XLOC_009847	Ca_05435	-1.32133	0.0264	XLOC_012578	-	1.17518	0.03715
				XLOC_013926	Ca_07508	-1.74469	0.00015					XLOC_014197	Ca_03948	-1.32109	0.0264	XLOC_003636	Ca_12605	1.17335	0.0245
				XLOC_022072	Ca_03230	-1.74381	0.0341					XLOC_002408	Ca_02535	-1.32107	0.0045	XLOC_018032	Ca_17396	1.16982	0.03815
				XLOC_022341	Ca_06626	-1.74356	0.0002					XLOC_007635	Ca_18810	-1.31948	0.015	XLOC_008646	Ca_00976	1.16666	0.02525
				XLOC_013854	Ca_01420	-1.74023	0.01995					XLOC_020870	Ca_17309	-1.31942	0.0107	XLOC_030795	-	1.16455	0.04235
				XLOC_008169	Ca_08192	-1.73941	0.0003					XLOC_008841	Ca_01350	-1.31926	0.00355	XLOC_020660	Ca_06816	1.16452	0.0297
				XLOC_015008	Ca_13411	-1.73793	0.00015					XLOC_021590	Ca_10000	-1.31257	0.00855	XLOC_014045	Ca_11385	1.16389	0.03025
				XLOC_029598	Ca_23921	-1.73484	0.0002					XLOC_030789	Ca_25670	-1.31022	0.02745	XLOC_015267	Ca_05008	1.16362	0.0204
				XLOC_022041	Ca_03299	-1.72885	0.0341					XLOC_020581	Ca_03056	-1.30958	0.00495	XLOC_021126	Ca_09931	1.16265	0.0216
				XLOC_012539	-	-1.72657	0.0052					XLOC_030709	Ca_23217	-1.30925	0.0027	XLOC_018532	Ca_09555	1.1625	0.0215
				XLOC_016829	Ca_05093	-1.72513	0.02565					XLOC_017060	Ca_06436	-1.30757	0.0029	XLOC_015045	Ca_13354	1.16237	0.0152
				XLOC_024690	Ca_02375	-1.71788	0.0004					XLOC_001111	Ca_14726	-1.30572	0.00175	XLOC_012530	Ca_10760	1.16161	0.02345
				XLOC_022207	Ca_02968	-1.71657	0.0019					XLOC_012661	-	-1.30349	0.0022	XLOC_029413	Ca_25364	1.16052	0.02475
				XLOC_015010	Ca_13408	-1.71583	0.00085					XLOC_015939	Ca_04141	-1.30187	0.0323	XLOC_001488	Ca_21844	1.16006	0.0331
				XLOC_008669	Ca_01022	-1.71353	0.01975					XLOC_007776	Ca_18279	-1.30123	0.0044	XLOC_011229	Ca_08315	1.15938	0.0165
				XLOC_007886	Ca_09445	-1.71022	5e-05					XLOC_025048	Ca_11531	-1.30096	0.00695	XLOC_008502	Ca_00702	1.15931	0.0247
				XLOC_014861	Ca_17664	-1.70964	0.00225					XLOC_009835	Ca_05454	-1.29993	0.00485	XLOC_017209	Ca_11258	1.15888	0.0297
				XLOC_022061	Ca_03254	-1.70777	0.0006					XLOC_018445	Ca_05666	-1.29791	0.04485	XLOC_012529	Ca_10762	1.15856	0.0291
				XLOC_003578	-	-1.7056	0.0066					XLOC_014277	Ca_04101	-1.29669	0.00725	XLOC_022482	Ca_12751	1.15766	0.02085
				XLOC_024084	Ca_02083	-1.70344	0.0001					XLOC_021441	Ca_18955	-1.29659	0.0034	XLOC_006198	Ca_16527	1.15634	0.0397
				XLOC_017580	Ca_15803	-1.70259	5e-05					XLOC_022907	-	-1.29615	0.00715	XLOC_030037	Ca_20173	1.15607	0.0326
				XLOC_023954	Ca_02325	-1.70199	5e-05					XLOC_010742	Ca_10799	-1.29473	0.04295	XLOC_029648	Ca_19952	1.15455	0.04175
				XLOC_017531	Ca_15224	-1.69793	0.0001					XLOC_013884	Ca_07422	-1.29444	0.00345	XLOC_011628	Ca_05470	1.15414	0.02425
				XLOC_020375	Ca_20239	-1.69711	5e-05					XLOC_008086	Ca_06012	-1.29412	0.04265	XLOC_015295	Ca_01893	1.15399	0.02215
				XLOC_005030	Ca_18145	-1.69505	0.0013					XLOC_018417	Ca_05718	-1.29353	0.01	XLOC_010642	Ca_09202	1.15298	0.02395
				XLOC_000335	Ca_00359	-1.69438	0.00055					XLOC_000306	Ca_00310	-1.29266	0.00685	XLOC_023352	Ca_16400	1.15242	0.0273
				XLOC_009884	Ca_05354	-1.69368	0.0009					XLOC_019481	Ca_22072	-1.29165	0.03325	XLOC_009797	Ca_05516	1.15154	0.0308
				XLOC_027888	Ca_22997	-1.69203	0.0192					XLOC_000983	Ca_07036	-1.28652	0.0235	XLOC_018254	Ca_10376	1.1512	0.02835
				XLOC_028293	-	-1.69075	0.00065					XLOC_016716	Ca_08569	-1.28635	0.0034	XLOC_007387	Ca_01305,Ca_01306	1.15065	0.03775
				XLOC_012227	Ca_14931,Ca_14935	-1.68847	0.0258					XLOC_012726	-	-1.28634	0.0019	XLOC_024782	Ca_02192	1.15018	0.02505
				XLOC_019411	Ca_16468	-1.68459	0.0096					XLOC_002626	Ca_06899	-1.2813	0.01745	XLOC_016477	Ca_05748	1.15013	0.01725
				XLOC_024156	Ca_01960	-1.68196	0.0225					XLOC_011173	Ca_03512	-1.28079	0.00255	XLOC_000271	Ca_00238	1.14872	0.03095
				XLOC_024819	Ca_02119	-1.68186	0.0002					XLOC_000813	Ca_02585	-1.27945	0.0115	XLOC_006577	Ca_06275	1.14742	0.0208
				XLOC_019376	Ca_17455	-1.68175	0.0034					XLOC_020630	Ca_02959	-1.27932	0.0103	XLOC_013926	Ca_07508	1.14629	0.025
				XLOC_024901	Ca_01934	-1.68099	0.00085					XLOC_010795	Ca_20767	-1.27865	0.0062	XLOC_022486	Ca_12756	1.14626	0.0358
				XLOC_006987	Ca_12221	-1.67952	0.00255					XLOC_002008	Ca_00540	-1.27771	0.0334	XLOC_012470	Ca_19252	1.146	0.028
				XLOC_023695	-	-1.67433	0.03835					XLOC_025179	Ca_20108	-1.27711	0.00655	XLOC_005417	Ca_14250	1.14475	0.01885
				XLOC_010980	Ca_12130	-1.67398	5e-05					XLOC_021040	Ca_16022	-1.27606	0.0266	XLOC_020584	Ca_03052	1.14416	0.02275
				XLOC_012089	Ca_20019	-1.67294	5e-05					XLOC_010985	Ca_12139	-1.27525	0.00225	XLOC_003511	-	1.14247	0.04835
				XLOC_006756	Ca_08255	-1.67016	5e-05					XLOC_006870	Ca_07205	-1.27324	0.03675	XLOC_012502	Ca_10821	1.14055	0.035
				XLOC_029070	Ca_22200	-1.66955	0.0116					XLOC_000590	-	-1.27241	0.00265	XLOC_018761	Ca_05120	1.1405	0.03845
				XLOC_024143	Ca_01977	-1.66936	0.00165					XLOC_016768	Ca_23419	-1.27054	0.00805	XLOC_007911	Ca_09495	1.14043	0.0264
				XLOC_002756	-	-1.66517	0.00525					XLOC_030791	-	-1.26991	0.00535	XLOC_030455	Ca_22417	1.13791	0.0239
				XLOC_008130	Ca_08280	-1.66304	0.00045					XLOC_027467	Ca_25403	-1.2699	0.01515	XLOC_024476	Ca_13008	1.13688	0.0341
				XLOC_016349	Ca_10438	-1.65896	5e-05					XLOC_002767	-	-1.26782	0.0047	XLOC_014616	Ca_23356	1.13561	0.0271
				XLOC_024691	Ca_02374	-1.6584	0.0001					XLOC_012963	Ca_23747	-1.26669	0.01235	XLOC_005578	Ca_16102	1.13364	0.0463
				XLOC_018699	Ca_25054	-1.65527	0.0005					XLOC_005562	Ca_16139	-1.26613	0.0384	XLOC_020789	Ca_13231	1.13194	0.03545
				XLOC_013640	Ca_01844	-1.64949	0.0001					XLOC_023413	Ca_24263	-1.2656	0.02215	XLOC_014934	Ca_08975	1.13145	0.03595
				XLOC_000260	Ca_00214	-1.64848	0.00045					XLOC_002667	Ca_14765	-1.26138	0.0037	XLOC_021956	Ca_20240	1.12969	0.01925
				XLOC_010653	Ca_18391	-1.64745	0.00095					XLOC_019821	Ca_13465	-1.25986	0.01205	XLOC_000190	Ca_00086	1.1282	0.0374
				XLOC_021863	Ca_21359	-1.64713	0.003					XLOC_014673	-	-1.2573	0.01995	XLOC_010772	Ca_10746	1.12796	0.04055
				XLOC_011227	Ca_08312	-1.64709	0.00025					XLOC_015794	Ca_12669	-1.25649	0.0043	XLOC_005542	Ca_14346	1.12779	0.04605
				XLOC_023746	-	-1.64707	0.0003					XLOC_020506	Ca_03208	-1.25528	0.03515	XLOC_014503	Ca_18744	1.12603	0.02
				XLOC_009586	Ca_04406	-1.64699	0.00145					XLOC_016226	Ca_13259	-1.25377	0.0443	XLOC_000990	Ca_07020	1.12483	0.02725
				XLOC_005585	Ca_16094	-1.64664	0.00025					XLOC_019196	Ca_11127	-1.25097	0.00425	XLOC_012240	Ca_14896	1.12483	0.02655
				XLOC_008111	Ca_23889	-1.64593	0.02085					XLOC_020290	-	-1.25083	0.022	XLOC_018415	Ca_05728	1.12445	0.0201
				XLOC_009266	Ca_03702	-1.64581	0.00245					XLOC_022147	Ca_03090	-1.25078	0.0467	XLOC_014732	Ca_22856	1.12372	0.03555
				XLOC_013434	-	-1.64556	0.00745					XLOC_003744	Ca_10453	-1.25037	0.015	XLOC_000945	Ca_07110	1.12149	0.0333
				XLOC_010652	Ca_18392	-1.6453	0.0129					XLOC_004799	Ca_12588	-1.24993	0.04545	XLOC_026188	-	1.12087	0.0367
				XLOC_009498	Ca_08456	-1.64238	0.0021					XLOC_020307	-	-1.24934	0.00705	XLOC_000577	Ca_08000	1.12032	0.0258
				XLOC_008216	Ca_08107	-1.64203	0.0003					XLOC_019197	Ca_11124	-1.24887	0.01215	XLOC_012352	Ca_09062	1.1167	0.04135
				XLOC_021152	Ca_09868	-1.63948	0.04485					XLOC_024592	Ca_11883	-1.24854	0.03745	XLOC_023409	Ca_24270	1.11599	0.03465
				XLOC_017566	Ca_22054	-1.63596	0.03465					XLOC_000430	Ca_00535	-1.24666	0.00495	XLOC_029871	Ca_24750,Ca_24751	1.11562	0.04935
				XLOC_022451	Ca_15303	-1.63088	0.0001					XLOC_006740	Ca_08276	-1.24572	0.00365	XLOC_017521	Ca_15203	1.11494	0.03185
				XLOC_001041	Ca_06909	-1.62889	0.00035					XLOC_020048	Ca_13672	-1.24489	0.00905	XLOC_001691	Ca_25113	1.11455	0.01935
				XLOC_003886	Ca_21460	-1.62863	0.0004					XLOC_003204	Ca_23117	-1.2433	0.0034	XLOC_028867	Ca_24520	1.11391	0.0325
				XLOC_008939	-	-1.62784	0.0018					XLOC_023868	Ca_15065	-1.24283	0.0485	XLOC_004520	Ca_10265	1.11304	0.02235
				XLOC_013072	Ca_22489	-1.62657	0.00195					XLOC_014260	Ca_04076	-1.23825	0.02225	XLOC_012156	Ca_15125	1.11113	0.0278
				XLOC_025092	Ca_19718	-1.62628	0.01405					XLOC_018990	Ca_06430	-1.2373	0.0046	XLOC_018012	Ca_19011	1.11051	0.02795
				XLOC_009766	Ca_05576	-1.62499	0.00015					XLOC_002786	-	-1.23245	0.0051	XLOC_011766	Ca_14049	1.11048	0.03125
				XLOC_023687	-	-1.62289	0.00285					XLOC_007886	Ca_09445	-1.23024	0.013	XLOC_009190	Ca_03856	1.10885	0.03045
				XLOC_015255	Ca_04987	-1.62276	0.0275					XLOC_019159	Ca_11196	-1.2295	0.0456	XLOC_021615	Ca_21006	1.1077	0.02755
				XLOC_027877	Ca_22996	-1.6191	0.0164					XLOC_006768	Ca_08236	-1.22923	0.0031	XLOC_018580	Ca_08676	1.10751	0.0326
				XLOC_028742	Ca_26583	-1.61502	0.00035					XLOC_000461	Ca_00611	-1.22774	0.00355	XLOC_004255	Ca_14236	1.10584	0.0493
				XLOC_001837	Ca_00175	-1.61389	0.00425					XLOC_025509	Ca_26534	-1.2222	0.04085	XLOC_007624	Ca_20972	1.10545	0.02415
				XLOC_028705	Ca_25860	-1.61352	0.00045					XLOC_000109	Ca_27556	-1.22207	0.00435	XLOC_008266	Ca_07231	1.10487	0.04145
				XLOC_027392	Ca_24938	-1.6113	0.00085					XLOC_000659	Ca_02903	-1.22117	0.0388	XLOC_005831	Ca_09710	1.10443	0.04705
				XLOC_010135	Ca_20455	-1.60211	0.0062					XLOC_009163	Ca_12146	-1.22006	0.01615	XLOC_019711	Ca_13864	1.10441	0.03035
				XLOC_013499	Ca_04833	-1.60099	0.0002					XLOC_020845	Ca_15316	-1.21845	0.00465	XLOC_017703	Ca_21958	1.10431	0.04735
				XLOC_022330	Ca_06646	-1.60084	0.0215					XLOC_015988	Ca_04241	-1.21809	0.0087	XLOC_014141	Ca_12651	1.10412	0.0351
				XLOC_002707	Ca_17370	-1.59673	0.001					XLOC_009168	Ca_12155	-1.21727	0.0192	XLOC_026535	Ca_23657,Ca_23658	1.10088	0.03235
				XLOC_025300	Ca_15527	-1.59258	0.00015					XLOC_024019	Ca_02208	-1.21596	0.00485	XLOC_009874	Ca_05367	1.0996	0.023
				XLOC_023221	Ca_16191	-1.59216	0.00225					XLOC_017485	Ca_16490	-1.21406	0.00725	XLOC_025253	Ca_12963	1.09821	0.02865
				XLOC_021695	Ca_13721	-1.59133	0.0004					XLOC_013444	Ca_04710	-1.21168	0.00715	XLOC_012350	Ca_09058	1.09702	0.02845
				XLOC_008834	Ca_01334	-1.58919	0.00085					XLOC_011172	Ca_03515	-1.21131	0.00405	XLOC_007887	Ca_09446	1.09638	0.0232
				XLOC_015236	Ca_04943	-1.58792	0.0028					XLOC_010335	Ca_14822	-1.21112	0.0034	XLOC_011993	Ca_14192	1.09598	0.018
				XLOC_015036	Ca_13366	-1.58475	0.03695					XLOC_011459	Ca_04524	-1.2107	0.00465	XLOC_025190	-	1.0957	0.03005
				XLOC_022153	Ca_03081	-1.58411	0.0058					XLOC_027449	-	-1.21059	0.0094	XLOC_010741	Ca_10801	1.09524	0.0346
				XLOC_018792	Ca_05173	-1.58359	0.0034					XLOC_008940	-	-1.21057	0.01165	XLOC_011796	Ca_17165	1.09411	0.01935
				XLOC_029188	Ca_23799	-1.58298	0.0002					XLOC_013514	Ca_04858	-1.20988	0.0208	XLOC_011413	Ca_04438	1.09351	0.0356
				XLOC_006169	-	-1.58221	0.0016					XLOC_019116	Ca_11292	-1.209	0.03545	XLOC_000718	Ca_02774	1.09337	0.0287
				XLOC_000790	Ca_02631	-1.5801	0.00025					XLOC_011378	Ca_04366	-1.20722	0.00595	XLOC_009392	Ca_03485	1.09132	0.03285
				XLOC_005053	Ca_22315	-1.58006	0.0018					XLOC_005253	Ca_22036	-1.2053	0.02385	XLOC_012836	Ca_20731	1.09045	0.02485
				XLOC_023884	Ca_15034	-1.57728	0.0002					XLOC_018657	Ca_08538	-1.20424	0.02295	XLOC_000333	Ca_00354	1.08926	0.02165
				XLOC_022361	Ca_06592	-1.57545	0.00095					XLOC_021786	Ca_24265	-1.20386	0.00605	XLOC_020551	Ca_03119	1.089	0.0263
				XLOC_030916	Ca_21402	-1.56662	0.00045					XLOC_004149	Ca_25223	-1.20381	0.00585	XLOC_010838	Ca_07701	1.08774	0.02585
				XLOC_000813	Ca_02585	-1.56478	0.0006					XLOC_021145	Ca_09882	-1.20051	0.01825	XLOC_022832	Ca_12394	1.08773	0.0319
				XLOC_022304	Ca_06686	-1.5608	0.00215					XLOC_013923	Ca_07503	-1.20012	0.0107	XLOC_023342	Ca_16385	1.08702	0.04485
				XLOC_023165	Ca_10048	-1.5594	0.00015					XLOC_001946	Ca_00411	-1.19948	0.0144	XLOC_005653	Ca_12421	1.08626	0.03265
				XLOC_022165	Ca_03051	-1.55895	0.0098					XLOC_015011	-	-1.19921	0.0091	XLOC_018528	Ca_09569	1.08461	0.02545
				XLOC_003444	-	-1.55471	0.0223					XLOC_014110	Ca_12718	-1.19864	0.01075	XLOC_000946	Ca_07106	1.08349	0.03655
				XLOC_023040	-	-1.55213	0.0256					XLOC_016917	Ca_05274	-1.19826	0.01135	XLOC_028033	Ca_23466	1.08344	0.03
				XLOC_020068	Ca_13637	-1.54885	5e-05					XLOC_005581	Ca_16098	-1.19653	0.0146	XLOC_005251	Ca_22033	1.07901	0.0354
				XLOC_006780	Ca_08205	-1.54776	0.0045					XLOC_007159	Ca_00817	-1.19389	0.00615	XLOC_012407	Ca_09168	1.07875	0.02405
				XLOC_015731	Ca_11350	-1.54661	0.04675					XLOC_008324	Ca_07340	-1.19053	0.0076	XLOC_001309	Ca_25078	1.07707	0.02545
				XLOC_014772	Ca_22812	-1.54533	0.0246					XLOC_020767	Ca_06606	-1.19043	0.01155	XLOC_010650	Ca_09217	1.07476	0.02495
				XLOC_028044	Ca_24392	-1.54107	0.00175					XLOC_010911	Ca_07837	-1.18968	0.01255	XLOC_015463	Ca_01557	1.07463	0.04675
				XLOC_007869	Ca_09399	-1.54093	0.00115					XLOC_022082	Ca_03207	-1.1894	0.027	XLOC_023084	Ca_11698	1.07405	0.0357
				XLOC_020420	Ca_03369	-1.54035	0.02805					XLOC_010743	Ca_10797	-1.18934	0.0051	XLOC_018950	Ca_06343	1.06836	0.0365
				XLOC_016129	-	-1.53959	0.00185					XLOC_001972	-	-1.18849	0.0049	XLOC_009032	Ca_07662	1.06502	0.03045
				XLOC_004566	Ca_10181	-1.53732	0.0097					XLOC_012655	-	-1.1883	0.02315	XLOC_009251	Ca_03726	1.06451	0.03615
				XLOC_019732	Ca_17750	-1.53437	0.00025					XLOC_017006	Ca_06332	-1.18798	0.00645	XLOC_009379	Ca_03510	1.06227	0.0277
				XLOC_027887	Ca_22994	-1.52593	0.00075					XLOC_021087	Ca_23035	-1.18768	0.0044	XLOC_008750	Ca_01176	1.05723	0.04355
				XLOC_012427	Ca_09214	-1.52592	0.0189					XLOC_015717	Ca_11381	-1.18747	0.00595	XLOC_015545	Ca_01392	1.05481	0.04855
				XLOC_012652	-	-1.52492	0.03925					XLOC_020973	Ca_09325	-1.18741	0.0057	XLOC_011051	Ca_03778	1.04835	0.0349
				XLOC_004389	Ca_14321	-1.5225	0.002					XLOC_001493	Ca_23532	-1.18675	0.0052	XLOC_022548	Ca_09347	1.04748	0.04865
				XLOC_023661	-	-1.52025	0.03265					XLOC_007869	Ca_09399	-1.1856	0.0126	XLOC_005463	Ca_17275	1.04744	0.03995
				XLOC_015208	Ca_04885	-1.5202	0.00045					XLOC_021821	Ca_17979	-1.1841	0.0071	XLOC_008356	Ca_07401	1.04688	0.04015
				XLOC_007023	Ca_12290	-1.51997	0.00075					XLOC_009704	Ca_04634	-1.17999	0.0068	XLOC_029928	Ca_19104	1.046	0.0401
				XLOC_026926	Ca_26052	-1.51553	0.00045					XLOC_013686	Ca_01749	-1.17941	0.01655	XLOC_020808	Ca_13185	1.04446	0.0393
				XLOC_008646	Ca_00976	-1.51339	0.00065					XLOC_000294	Ca_00286	-1.17926	0.0202	XLOC_015278	Ca_01921	1.04445	0.03065
				XLOC_019364	Ca_17472	-1.5106	0.00205					XLOC_016220	Ca_13249	-1.17893	0.0091	XLOC_012508	Ca_10810	1.04352	0.04775
				XLOC_025919	Ca_25023	-1.5093	0.0082					XLOC_019195	Ca_11128	-1.17841	0.0197	XLOC_009615	Ca_04462	1.04344	0.0332
				XLOC_006416	Ca_21116	-1.50631	0.0006					XLOC_007279	Ca_01074	-1.17633	0.01895	XLOC_000379	Ca_00441	1.04305	0.02915
				XLOC_010169	Ca_23163	-1.50544	5e-05					XLOC_016612	Ca_09579	-1.17545	0.0057	XLOC_001888	Ca_00287	1.04141	0.03905
				XLOC_016313	Ca_10382	-1.50506	0.0004					XLOC_002052	Ca_00612	-1.17482	0.0067	XLOC_022111	Ca_03152	1.03879	0.04305
				XLOC_013986	Ca_07623	-1.50366	0.00025					XLOC_001245	Ca_20634	-1.17451	0.00445	XLOC_011120	Ca_03624	1.0366	0.02325
				XLOC_022515	Ca_12821	-1.50365	0.0035					XLOC_007522	Ca_22092	-1.17444	0.0436	XLOC_024473	Ca_13014	1.0365	0.03615
				XLOC_020494	Ca_03233	-1.50003	0.003					XLOC_017809	-	-1.17376	0.02445	XLOC_027814	Ca_22267	1.03606	0.03775
				XLOC_024027	Ca_02185	-1.4986	0.0054					XLOC_003473	-	-1.17197	0.0432	XLOC_013150	Ca_18237	1.03097	0.04305
				XLOC_025824	Ca_26369	-1.49802	0.00565					XLOC_020774	Ca_06593	-1.17007	0.00475	XLOC_018388	Ca_05788	1.03049	0.0396
				XLOC_011949	Ca_23178	-1.49741	0.00065					XLOC_023165	Ca_10048	-1.16984	0.0269	XLOC_024321	-	1.02322	0.03195
				XLOC_024000	Ca_02249	-1.49695	0.0009					XLOC_009260	Ca_03712	-1.16959	0.0094	XLOC_028822	Ca_23625	1.02189	0.04535
				XLOC_006443	Ca_19636	-1.49665	0.0004					XLOC_024204	Ca_10701	-1.16829	0.01465	XLOC_017063	Ca_06440	1.02171	0.04795
				XLOC_006870	Ca_07205	-1.49551	0.04395					XLOC_007688	Ca_21009	-1.16613	0.01785	XLOC_002363	Ca_02625	1.02085	0.03675
				XLOC_016768	Ca_23419	-1.49519	0.001					XLOC_015422	Ca_01626	-1.16573	0.0308	XLOC_011505	Ca_04622	1.02071	0.035
				XLOC_024585	Ca_11897	-1.49498	0.00075					XLOC_002693	Ca_14717	-1.1652	0.01385	XLOC_002622	Ca_06908	1.02066	0.04655
				XLOC_006924	Ca_07322	-1.49348	0.00085					XLOC_004801	Ca_12581,Ca_12582	-1.16422	0.02795	XLOC_014362	Ca_04272	1.0195	0.04185
				XLOC_001855	Ca_00220	-1.4915	0.0003					XLOC_000985	Ca_07033	-1.16421	0.01285	XLOC_010749	Ca_10788	1.01935	0.0395
				XLOC_030284	Ca_27397	-1.49103	0.00085					XLOC_002112	Ca_07904	-1.16409	0.00695	XLOC_029945	Ca_25150	1.01704	0.0433
				XLOC_008733	Ca_01153	-1.49077	0.0107					XLOC_009731	-	-1.16353	0.0051	XLOC_024466	Ca_13028	1.01685	0.04345
				XLOC_023956	Ca_02320	-1.48328	0.00225					XLOC_008245	Ca_07187	-1.16322	0.0469	XLOC_014227	Ca_04010	1.01637	0.0394
				XLOC_023590	-	-1.4831	0.0219					XLOC_001156	Ca_08856	-1.16266	0.0105	XLOC_021762	Ca_16427	1.01533	0.04645
				XLOC_008943	-	-1.48272	0.0004					XLOC_030720	-	-1.16258	0.00625	XLOC_018772	Ca_05139	1.01438	0.0319
				XLOC_012537	Ca_23007	-1.48262	0.015					XLOC_020666	Ca_06805	-1.16127	0.01265	XLOC_012088	Ca_20018	1.01357	0.02885
				XLOC_014061	Ca_11350	-1.4825	0.0022					XLOC_026775	Ca_20795	-1.16048	0.0088	XLOC_000818	Ca_02578	1.01298	0.03135
				XLOC_008841	Ca_01350	-1.48106	0.0007					XLOC_020363	-	-1.15981	0.0345	XLOC_019195	Ca_11128	1.01095	0.04875
				XLOC_002067	Ca_00656	-1.48075	0.0029					XLOC_002622	Ca_06908	-1.15975	0.0141	XLOC_030247	Ca_25238	1.00911	0.03805
				XLOC_001922	Ca_00362	-1.47286	0.004					XLOC_002759	-	-1.15919	0.00645	XLOC_006728	Ca_08299,Ca_08300	1.00833	0.0416
				XLOC_011596	Ca_05546	-1.47015	0.04215					XLOC_002573	Ca_07001	-1.1587	0.02285	XLOC_013127	Ca_22809	1.00592	0.03805
				XLOC_011295	-	-1.47014	0.0221					XLOC_009361	Ca_03536	-1.15826	0.01525	XLOC_013818	Ca_01496	1.00424	0.0331
				XLOC_003875	Ca_18150	-1.47005	0.0023					XLOC_024788	Ca_02184	-1.15648	0.0123	XLOC_021068	-	1.00225	0.04115
				XLOC_013313	Ca_08964	-1.47003	0.001					XLOC_029209	Ca_22614	-1.15492	0.01315	XLOC_022709	Ca_09858	1.0018	0.0374
				XLOC_000268	Ca_00230	-1.46895	0.0347					XLOC_002241	Ca_02855	-1.15212	0.01395	XLOC_012844	Ca_20739	1.00085	0.0487
				XLOC_001948	Ca_00413	-1.46556	0.00055					XLOC_000940	-	-1.15145	0.01035	XLOC_012318	Ca_10908	1.00058	0.04275
				XLOC_020017	Ca_17430	-1.46504	0.00305					XLOC_018821	Ca_05221	-1.15114	0.0246
				XLOC_005968	-	-1.46499	0.00655					XLOC_017041	Ca_06411	-1.15019	0.01225
				XLOC_009748	-	-1.46358	0.0118					XLOC_019642	Ca_23160	-1.14868	0.0093
				XLOC_006024	-	-1.46114	0.00325					XLOC_018392	-	-1.14417	0.0061
				XLOC_011821	Ca_20142	-1.46032	0.04305					XLOC_010255	Ca_15496	-1.14386	0.01785
				XLOC_023427	Ca_20265	-1.45962	0.00305					XLOC_021747	Ca_16398	-1.14361	0.0229
				XLOC_024501	Ca_12960	-1.45621	0.0011					XLOC_027715	Ca_24344	-1.14261	0.0085
				XLOC_013902	Ca_07467	-1.45453	0.0009					XLOC_017014	Ca_06350	-1.14233	0.0097
				XLOC_017565	-	-1.45236	0.00075					XLOC_019958	Ca_21204	-1.14009	0.02685
				XLOC_014942	Ca_08954	-1.4523	0.01985					XLOC_004785	Ca_12616	-1.13886	0.022
				XLOC_029059	Ca_26395,Ca_26396	-1.44989	0.0158					XLOC_004001	Ca_18059	-1.13795	0.0206
				XLOC_016178	-	-1.44425	0.00055					XLOC_003683	Ca_10579	-1.13778	0.0125
				XLOC_007393	Ca_01314	-1.44381	0.0027					XLOC_018960	Ca_06364	-1.13713	0.03155
				XLOC_000836	Ca_02547	-1.44363	0.04265					XLOC_027653	Ca_27079	-1.13465	0.0384
				XLOC_007796	Ca_23344	-1.44356	0.00045					XLOC_002094	Ca_00701	-1.13451	0.0159
				XLOC_023497	Ca_15699	-1.44317	0.00975					XLOC_008542	Ca_00783	-1.13451	0.02525
				XLOC_009877	Ca_05364	-1.4425	0.002					XLOC_013783	Ca_01559	-1.13439	0.01455
				XLOC_008004	Ca_06168	-1.44154	0.0052					XLOC_023812	Ca_11889	-1.13319	0.01565
				XLOC_022674	Ca_09921	-1.4413	0.0011					XLOC_025068	-	-1.13174	0.04135
				XLOC_020746	Ca_06654	-1.44119	0.04565					XLOC_008217	Ca_08106	-1.13108	0.01035
				XLOC_005642	Ca_12448	-1.43627	0.0005					XLOC_022279	-	-1.13075	0.00795
				XLOC_000294	Ca_00286	-1.4353	0.0233					XLOC_001836	Ca_00171	-1.13073	0.01085
				XLOC_019817	Ca_13472	-1.43528	0.00355					XLOC_006018	-	-1.13014	0.02495
				XLOC_013336	Ca_08892	-1.4332	0.00095					XLOC_011386	Ca_04380	-1.12764	0.00685
				XLOC_011551	-	-1.43266	0.00085					XLOC_029524	Ca_22396	-1.12652	0.0101
				XLOC_027921	-	-1.43053	0.0043					XLOC_023068	Ca_11729	-1.12613	0.00755
				XLOC_020259	-	-1.42941	0.00265					XLOC_004338	Ca_15641	-1.12509	0.0131
				XLOC_018900	Ca_19676	-1.42383	0.00135					XLOC_004368	Ca_14375	-1.12291	0.0262
				XLOC_002341	Ca_02674	-1.42332	0.0011					XLOC_019035	Ca_06523	-1.12123	0.00705
				XLOC_013580	Ca_04981	-1.41759	0.0025					XLOC_015920	Ca_04099	-1.11972	0.01955
				XLOC_015417	Ca_01640	-1.41685	0.0008					XLOC_012061	Ca_20369	-1.11884	0.0196
				XLOC_023409	Ca_24270	-1.41236	0.0017					XLOC_020573	Ca_03067	-1.11877	0.0296
				XLOC_014333	Ca_04204	-1.41184	0.0046					XLOC_023924	Ca_02402	-1.11832	0.0224
				XLOC_015418	Ca_01638	-1.40791	0.0015					XLOC_020963	Ca_09342	-1.11818	0.01455
				XLOC_023632	-	-1.40667	0.01695					XLOC_005630	-	-1.11788	0.00605
				XLOC_004474	Ca_12422	-1.4066	0.0042					XLOC_000776	Ca_02656	-1.11649	0.0318
				XLOC_023231	Ca_20991	-1.40428	0.01					XLOC_001083	Ca_14776	-1.11548	0.0297
				XLOC_003502	-	-1.40402	0.02365					XLOC_000566	Ca_07984	-1.11347	0.0183
				XLOC_017977	Ca_16284	-1.40311	0.0238					XLOC_024790	Ca_02182	-1.11251	0.01965
				XLOC_004127	Ca_16002	-1.40265	0.0017					XLOC_016348	Ca_10437	-1.11238	0.02055
				XLOC_022901	Ca_19512,Ca_19513	-1.40244	0.00275					XLOC_016324	Ca_10397	-1.11221	0.0059
				XLOC_026192	Ca_19774	-1.40044	0.00075					XLOC_016569	Ca_09650	-1.11151	0.02775
				XLOC_019292	Ca_16709	-1.3994	0.0018					XLOC_009240	Ca_03740	-1.11082	0.0068
				XLOC_003683	Ca_10579	-1.3975	0.0006					XLOC_024757	Ca_02238	-1.11014	0.02885
				XLOC_012424	Ca_09208	-1.39519	0.0009					XLOC_023101	Ca_23325	-1.10763	0.03425
				XLOC_001053	Ca_06887	-1.39136	0.00035					XLOC_009758	Ca_05598	-1.10583	0.02655
				XLOC_022102	Ca_03175	-1.39131	0.00585					XLOC_023062	Ca_11738	-1.10476	0.0104
				XLOC_015360	Ca_01757	-1.38895	0.00065					XLOC_015491	Ca_01495	-1.10467	0.04005
				XLOC_020704	Ca_06725	-1.38827	0.0067					XLOC_024141	Ca_01982	-1.10329	0.0279
				XLOC_004005	Ca_18069	-1.38497	0.0083					XLOC_012183	Ca_13124	-1.10321	0.03975
				XLOC_020307	-	-1.3846	0.00155					XLOC_018330	Ca_05903	-1.10291	0.0315
				XLOC_019188	Ca_11140	-1.38415	0.01875					XLOC_018160	Ca_13252	-1.10225	0.03875
				XLOC_007950	Ca_06270	-1.38329	0.00425					XLOC_027162	Ca_24799	-1.10053	0.01285
				XLOC_023991	Ca_02263	-1.38163	0.00045					XLOC_019788	Ca_20721	-1.1001	0.0143
				XLOC_020207	-	-1.38098	0.00135					XLOC_002333	Ca_02687	-1.0995	0.01655
				XLOC_012467	Ca_19256	-1.37729	0.00105					XLOC_003046	Ca_19452	-1.09944	0.00905
				XLOC_019093	Ca_16326	-1.37621	0.00295					XLOC_010439	Ca_14927	-1.09746	0.01395
				XLOC_006704	Ca_06008	-1.37518	0.00115					XLOC_004004	Ca_18067	-1.097	0.03645
				XLOC_019005	Ca_06456	-1.37273	0.0174					XLOC_026516	Ca_26981	-1.09672	0.0357
				XLOC_011164	Ca_03543	-1.37269	0.00815					XLOC_011716	Ca_18653	-1.09668	0.0148
				XLOC_006545	Ca_09503	-1.37215	0.0099					XLOC_010706	Ca_10862	-1.09637	0.009
				XLOC_003355	Ca_12923,Ca_12924,Ca_12925	-1.3714	0.02645					XLOC_005799	Ca_16888	-1.09428	0.01185
				XLOC_011982	Ca_14176	-1.37056	0.0044					XLOC_023990	Ca_02264	-1.09306	0.02445
				XLOC_004538	Ca_10239	-1.37042	0.0017					XLOC_000791	Ca_02630	-1.09294	0.01275
				XLOC_005932	-	-1.36985	0.00065					XLOC_020322	-	-1.09199	0.0114
				XLOC_004741	Ca_16979	-1.36817	0.0265					XLOC_013401	Ca_16625	-1.09188	0.0123
				XLOC_014277	Ca_04101	-1.36736	0.0013					XLOC_019290	Ca_16706	-1.09083	0.00775
				XLOC_009260	Ca_03712	-1.36688	0.0016					XLOC_022304	Ca_06686	-1.08948	0.03505
				XLOC_010947	Ca_12073	-1.36634	0.0018					XLOC_018543	Ca_09539	-1.08751	0.01405
				XLOC_019356	Ca_17483	-1.36307	0.03655					XLOC_000404	Ca_00486	-1.08723	0.0289
				XLOC_016775	Ca_23427	-1.36262	0.0024					XLOC_008551	Ca_00804	-1.08619	0.01135
				XLOC_001798	Ca_00102	-1.36213	0.0047					XLOC_007541	Ca_20660	-1.08486	0.00825
				XLOC_002626	Ca_06899	-1.36055	0.00335					XLOC_007154	Ca_00803	-1.08274	0.03975
				XLOC_026233	Ca_22594	-1.35956	0.006					XLOC_015146	Ca_04771	-1.08199	0.01765
				XLOC_024669	Ca_02420	-1.3595	0.001					XLOC_022643	Ca_09974	-1.08191	0.01155
				XLOC_011651	Ca_05427	-1.35926	0.0029					XLOC_026947	Ca_25722	-1.08185	0.0206
				XLOC_022965	Ca_16240	-1.35925	0.0333					XLOC_012490	Ca_10841	-1.08076	0.0364
				XLOC_030441	Ca_22420	-1.35693	0.00405					XLOC_029501	-	-1.07979	0.03145
				XLOC_029011	Ca_27487	-1.35478	0.0217					XLOC_006522	Ca_09467	-1.07904	0.01715
				XLOC_021952	Ca_20245	-1.35143	0.01215					XLOC_006120	Ca_22380	-1.0772	0.0171
				XLOC_015136	Ca_04754	-1.35132	0.00185					XLOC_019298	Ca_16720	-1.07716	0.0384
				XLOC_019788	Ca_20721	-1.35099	0.00125					XLOC_017572	Ca_15814	-1.07693	0.0202
				XLOC_008808	Ca_01280	-1.34863	0.01495					XLOC_015380	Ca_01721	-1.07666	0.0376
				XLOC_005558	Ca_25182	-1.34681	0.00175					XLOC_007332	Ca_01194	-1.07531	0.0104
				XLOC_006990	Ca_12226	-1.34672	0.02155					XLOC_003618	Ca_12631	-1.07499	0.03685
				XLOC_006783	Ca_08201	-1.34568	0.0022					XLOC_025138	Ca_16796	-1.07497	0.0445
				XLOC_003686	Ca_10572	-1.34526	0.00535					XLOC_020194	-	-1.07439	0.0227
				XLOC_009167	Ca_12154	-1.34504	0.03405					XLOC_000806	Ca_02599	-1.0698	0.0142
				XLOC_022887	Ca_14559	-1.34488	0.00375					XLOC_016615	Ca_09575	-1.06972	0.0124
				XLOC_009664	Ca_04564	-1.344	0.0023					XLOC_000584	Ca_08010	-1.06914	0.01625
				XLOC_007310	Ca_01128	-1.343	0.018					XLOC_000980	Ca_07041	-1.06901	0.03875
				XLOC_022839	Ca_12406	-1.33984	0.02125					XLOC_002664	Ca_14770	-1.06847	0.03885
				XLOC_019755	Ca_17705	-1.33695	0.0222					XLOC_010991	Ca_12148	-1.06677	0.0083
				XLOC_003097	Ca_21686	-1.33589	0.01495					XLOC_003644	Ca_12587	-1.0658	0.03005
				XLOC_011133	Ca_03601	-1.33582	0.0068					XLOC_004673	Ca_09741	-1.06472	0.048
				XLOC_021789	Ca_24258	-1.33434	0.001					XLOC_015050	Ca_13344	-1.06384	0.0382
				XLOC_005643	Ca_12446,Ca_12447	-1.33308	0.00695					XLOC_020621	Ca_02983	-1.06318	0.049
				XLOC_003918	Ca_20025	-1.33015	0.0029					XLOC_009085	Ca_07785	-1.06305	0.04945
				XLOC_027715	Ca_24344	-1.32749	0.0119					XLOC_018552	Ca_16777	-1.06233	0.01025
				XLOC_004406	Ca_16123	-1.32696	0.00335					XLOC_011651	Ca_05427	-1.06196	0.03115
				XLOC_024604	Ca_11862	-1.32601	0.03435					XLOC_008643	Ca_00970	-1.06124	0.0168
				XLOC_006979	Ca_12208	-1.3249	0.0013					XLOC_000876	Ca_02479	-1.06089	0.01685
				XLOC_016546	Ca_16943	-1.31918	0.0091					XLOC_002587	Ca_06977	-1.05782	0.02515
				XLOC_000614	Ca_08069	-1.31685	0.0075					XLOC_018905	Ca_19668	-1.05724	0.01065
				XLOC_014101	Ca_12733	-1.31645	0.041					XLOC_020807	Ca_13187	-1.05618	0.01935
				XLOC_007387	Ca_01305,Ca_01306	-1.31593	0.0062					XLOC_008022	Ca_06121	-1.05561	0.04345
				XLOC_012485	-	-1.31592	0.0033					XLOC_013927	Ca_07509	-1.05464	0.0136
				XLOC_013202	-	-1.31323	0.01405					XLOC_024801	Ca_02155	-1.05458	0.0166
				XLOC_027162	Ca_24799	-1.31306	0.0109					XLOC_023884	Ca_15034	-1.05383	0.01705
				XLOC_005217	-	-1.31164	0.00135					XLOC_009773	Ca_05562	-1.0518	0.0174
				XLOC_020413	-	-1.31046	0.0053					XLOC_019305	Ca_14632	-1.05035	0.01185
				XLOC_001668	Ca_24435	-1.30633	0.00175					XLOC_001002	Ca_06988	-1.04926	0.0108
				XLOC_014315	Ca_04171	-1.30592	0.00135					XLOC_002758	-	-1.04925	0.02095
				XLOC_016170	-	-1.30518	0.005					XLOC_020340	-	-1.04844	0.04745
				XLOC_000599	Ca_08030	-1.30467	0.00425					XLOC_018661	Ca_08532	-1.04773	0.0174
				XLOC_009822	Ca_05477	-1.30313	0.00355					XLOC_012050	Ca_24017	-1.04767	0.0169
				XLOC_013784	Ca_01556	-1.30227	0.01775					XLOC_016223	Ca_13256	-1.04595	0.0432
				XLOC_007444	Ca_22642	-1.29896	0.0067					XLOC_024483	Ca_13002	-1.04459	0.01305
				XLOC_029175	Ca_26058	-1.29855	0.0094					XLOC_006545	Ca_09503	-1.04412	0.039
				XLOC_000379	Ca_00441	-1.2985	0.00105					XLOC_008427	Ca_11976	-1.04403	0.0123
				XLOC_005095	Ca_17583	-1.29845	0.0012					XLOC_025024	Ca_11493	-1.04357	0.0255
				XLOC_022044	Ca_03294	-1.29766	0.04405					XLOC_017097	Ca_06504	-1.04345	0.01405
				XLOC_015988	Ca_04241	-1.29765	0.00195					XLOC_004588	Ca_15239	-1.04179	0.04
				XLOC_024888	Ca_01961	-1.29546	0.00505					XLOC_003302	Ca_25714	-1.04132	0.024
				XLOC_024208	Ca_10691	-1.29276	0.01385					XLOC_020684	Ca_06768	-1.04003	0.02505
				XLOC_010168	Ca_23165	-1.29255	0.02805					XLOC_001766	Ca_00042	-1.03805	0.01095
				XLOC_009888	Ca_18620	-1.28822	0.0021					XLOC_019331	Ca_14571	-1.03486	0.0183
				XLOC_023100	Ca_23326	-1.28609	0.00945					XLOC_015428	Ca_01612	-1.03361	0.0316
				XLOC_012893	Ca_20329	-1.28603	0.01325					XLOC_007096	Ca_00704	-1.03236	0.0345
				XLOC_020703	Ca_06727	-1.28522	0.0223					XLOC_001139	Ca_17360	-1.03224	0.01415
				XLOC_008217	Ca_08106	-1.28438	0.00185					XLOC_019224	Ca_11068	-1.0307	0.02525
				XLOC_011273	Ca_08394	-1.28211	0.0072					XLOC_005930	-	-1.03048	0.02845
				XLOC_025076	Ca_18399	-1.28135	0.0069					XLOC_012472	Ca_19247	-1.02985	0.0189
				XLOC_014134	Ca_12667	-1.28084	0.003					XLOC_007725	Ca_22495	-1.02936	0.04315
				XLOC_022412	Ca_13165	-1.27982	0.00605					XLOC_013641	Ca_01843	-1.0291	0.03955
				XLOC_000589	Ca_08020	-1.2752	0.0032					XLOC_014104	Ca_12729	-1.02733	0.01715
				XLOC_018469	Ca_16946	-1.27514	0.0017					XLOC_015566	Ca_07427	-1.02704	0.0361
				XLOC_023579	Ca_22555	-1.27499	0.0126					XLOC_018788	Ca_05167	-1.02469	0.0115
				XLOC_010719	Ca_10837	-1.27336	0.00455					XLOC_022064	Ca_03246	-1.02369	0.01575
				XLOC_023724	-	-1.27335	0.004					XLOC_023951	Ca_02334	-1.02249	0.03195
				XLOC_013444	Ca_04710	-1.27207	0.0062					XLOC_027703	Ca_26079	-1.02205	0.02355
				XLOC_009732	Ca_05650	-1.27082	0.04265					XLOC_013764	Ca_01602	-1.02176	0.0166
				XLOC_013937	Ca_07527	-1.26853	0.0052					XLOC_012556	Ca_20776	-1.02063	0.03865
				XLOC_008754	Ca_01180	-1.26578	0.0048					XLOC_024131	Ca_02001	-1.01922	0.0393
				XLOC_019079	Ca_16358	-1.26268	0.0079					XLOC_021987	Ca_03398	-1.01839	0.01785
				XLOC_007776	Ca_18279	-1.2621	0.00185					XLOC_024711	Ca_02343	-1.01762	0.03225
				XLOC_008637	Ca_00963	-1.26098	0.00175					XLOC_020796	-	-1.01635	0.01385
				XLOC_009823	Ca_05476	-1.26068	0.01895					XLOC_023443	Ca_17997	-1.01563	0.0147
				XLOC_014187	Ca_03927	-1.25977	0.0029					XLOC_001893	Ca_00300	-1.01368	0.0147
				XLOC_025242	Ca_12981	-1.2596	0.01205					XLOC_022295	Ca_06714	-1.01351	0.0147
				XLOC_012166	Ca_15105	-1.25949	0.00185					XLOC_024614	Ca_11840	-1.0122	0.02595
				XLOC_017061	Ca_06437	-1.2592	0.04535					XLOC_000068	Ca_27751	-1.01142	0.01925
				XLOC_017521	Ca_15203	-1.25867	0.0018					XLOC_012415	Ca_09192	-1.01125	0.0153
				XLOC_003605	Ca_20670	-1.25824	0.00385					XLOC_019292	Ca_16709	-1.0086	0.0417
				XLOC_020506	Ca_03208	-1.25619	0.00855					XLOC_012358	Ca_09074	-1.00645	0.01455
				XLOC_001860	Ca_00232	-1.25497	0.0427					XLOC_014885	Ca_15596,Ca_15597,Ca_15598	-1.00586	0.0382
				XLOC_000911	Ca_14124	-1.25466	0.03385					XLOC_005507	Ca_15690	-1.0022	0.0166
				XLOC_028846	Ca_27766	-1.25255	0.0404					XLOC_024580	-	-1.00197	0.01315
				XLOC_020430	Ca_03341	-1.25159	0.00245
				XLOC_012221	Ca_13059	-1.24915	0.00795
				XLOC_000566	Ca_07984	-1.24873	0.00265
				XLOC_010957	Ca_12095	-1.24815	0.0148
				XLOC_017100	Ca_06511	-1.24782	0.04545
				XLOC_005122	Ca_18782	-1.24174	0.0036
				XLOC_023352	Ca_16400	-1.24129	0.00535
				XLOC_007042	Ca_11986	-1.24047	0.00745
				XLOC_021855	-	-1.23989	0.0106
				XLOC_016391	Ca_05911	-1.23859	0.01175
				XLOC_016415	Ca_05861	-1.23753	0.0061
				XLOC_010694	Ca_19254	-1.23647	0.0346
				XLOC_016459	Ca_05780	-1.23467	0.0032
				XLOC_020383	Ca_20222	-1.2305	0.0182
				XLOC_024267	Ca_11451	-1.22932	0.00345
				XLOC_024058	Ca_02136	-1.22648	0.02
				XLOC_003062	-	-1.22487	0.0275
				XLOC_020861	Ca_17323	-1.22483	0.00505
				XLOC_007761	Ca_18257	-1.22444	0.00365
				XLOC_019141	Ca_11241	-1.22389	0.0064
				XLOC_008940	-	-1.22266	0.01185
				XLOC_004916	Ca_21092	-1.22096	0.00325
				XLOC_002453	Ca_14074	-1.22083	0.00355
				XLOC_020731	Ca_06689	-1.21841	0.00345
				XLOC_018624	Ca_08600	-1.21815	0.02005
				XLOC_001091	Ca_14762	-1.21726	0.0185
				XLOC_016909	Ca_05262	-1.21708	0.02915
				XLOC_009812	Ca_05490	-1.21632	0.0187
				XLOC_008981	-	-1.21177	0.03375
				XLOC_002786	-	-1.21171	0.00485
				XLOC_013761	Ca_01616	-1.20971	0.03385
				XLOC_023626	-	-1.20929	0.0407
				XLOC_003656	Ca_12564	-1.2084	0.0411
				XLOC_018543	Ca_09539	-1.20616	0.00195
				XLOC_002199	Ca_02943	-1.20557	0.00245
				XLOC_013764	Ca_01602	-1.20501	0.00305
				XLOC_001946	Ca_00411	-1.20481	0.0043
				XLOC_017744	Ca_13824,Ca_13825	-1.20454	0.0054
				XLOC_022467	Ca_17313	-1.20439	0.00665
				XLOC_027458	Ca_25492	-1.20013	0.02615
				XLOC_020517	Ca_03182	-1.19822	0.01235
				XLOC_010739	Ca_10803	-1.19813	0.01005
				XLOC_004622	Ca_16882	-1.19744	0.0115
				XLOC_012223	Ca_13055	-1.19677	0.01005
				XLOC_011173	Ca_03512	-1.19355	0.00605
				XLOC_022585	Ca_09253,Ca_09254	-1.19267	0.0081
				XLOC_002551	Ca_07050	-1.19265	0.01955
				XLOC_027685	Ca_25421	-1.191	0.01695
				XLOC_009005	-	-1.19092	0.0289
				XLOC_020388	Ca_24411	-1.18845	0.0114
				XLOC_022360	Ca_06596	-1.18798	0.00815
				XLOC_030135	Ca_27281	-1.18718	0.03205
				XLOC_003908	-	-1.18625	0.0068
				XLOC_006869	Ca_07202	-1.18559	0.0028
				XLOC_017178	Ca_19882	-1.18523	0.0276
				XLOC_015291	Ca_01898	-1.1842	0.0193
				XLOC_015937	-	-1.18082	0.0307
				XLOC_024790	Ca_02182	-1.17848	0.0125
				XLOC_020863	Ca_17319	-1.17843	0.0024
				XLOC_022942	Ca_23602	-1.17779	0.01045
				XLOC_014349	Ca_04233	-1.17761	0.02365
				XLOC_020581	Ca_03056	-1.17602	0.00265
				XLOC_015443	Ca_01593	-1.17587	0.0113
				XLOC_004792	Ca_12601	-1.1726	0.00525
				XLOC_013241	Ca_15586	-1.17168	0.03345
				XLOC_010782	Ca_23015	-1.16692	0.0119
				XLOC_021953	Ca_20244	-1.16518	0.00395
				XLOC_003200	Ca_18485	-1.16301	0.00695
				XLOC_023667	-	-1.16247	0.02605
				XLOC_017588	Ca_15783	-1.16122	0.02
				XLOC_008807	Ca_01279	-1.16118	0.01695
				XLOC_009021	Ca_27693	-1.16114	0.00535
				XLOC_011170	Ca_03524	-1.15883	0.00425
				XLOC_009255	Ca_03721	-1.15858	0.00525
				XLOC_010421	Ca_13074	-1.15798	0.00405
				XLOC_022444	Ca_15317	-1.15795	0.00495
				XLOC_023645	-	-1.1573	0.0206
				XLOC_018828	Ca_05233	-1.15551	0.00315
				XLOC_004062	-	-1.15494	0.0419
				XLOC_008322	Ca_07338	-1.1549	0.01515
				XLOC_022022	Ca_03335	-1.15478	0.01185
				XLOC_003149	Ca_13939	-1.15379	0.01285
				XLOC_023235	Ca_17601	-1.15337	0.0085
				XLOC_005581	Ca_16098	-1.15026	0.00545
				XLOC_023836	Ca_11841	-1.1494	0.03145
				XLOC_011829	Ca_20126	-1.14767	0.02235
				XLOC_016906	-	-1.14585	0.02055
				XLOC_004710	Ca_09808	-1.14557	0.017
				XLOC_007331	Ca_01193	-1.14436	0.0249
				XLOC_024965	Ca_10640	-1.14415	0.00885
				XLOC_009657	Ca_04545	-1.14323	0.02305
				XLOC_014683	Ca_21647	-1.14287	0.04765
				XLOC_009976	Ca_17150	-1.14136	0.0065
				XLOC_026896	-	-1.13941	0.0423
				XLOC_025896	Ca_22956	-1.1382	0.02485
				XLOC_010727	-	-1.13715	0.04245
				XLOC_010376	Ca_15097,Ca_15098	-1.13649	0.01735
				XLOC_002693	Ca_14717	-1.13634	0.0153
				XLOC_020698	Ca_06736	-1.13629	0.0434
				XLOC_015663	Ca_07624	-1.13368	0.01545
				XLOC_021074	Ca_16069	-1.13356	0.00945
				XLOC_018275	Ca_10435	-1.13132	0.0098
				XLOC_023155	Ca_10065	-1.12855	0.0178
				XLOC_012352	Ca_09062	-1.12841	0.00815
				XLOC_004877	Ca_10490	-1.12838	0.0369
				XLOC_007158	Ca_00814	-1.12715	0.00775
				XLOC_020716	Ca_06710	-1.12545	0.0088
				XLOC_020722	Ca_06702	-1.12183	0.0109
				XLOC_012490	Ca_10841	-1.12149	0.0067
				XLOC_020977	Ca_09315	-1.12082	0.0074
				XLOC_012472	Ca_19247	-1.12012	0.0072
				XLOC_022632	Ca_23046	-1.11979	0.0159
				XLOC_026199	Ca_19758	-1.11765	0.02795
				XLOC_016564	Ca_09663	-1.11685	0.00845
				XLOC_010560	Ca_23690	-1.11583	0.0092
				XLOC_019273	Ca_16677	-1.11548	0.00695
				XLOC_006601	Ca_06223	-1.11428	0.0133
				XLOC_002610	Ca_06931	-1.11352	0.00835
				XLOC_017394	Ca_14618	-1.11317	0.0081
				XLOC_016723	Ca_08553	-1.11231	0.0078
				XLOC_023342	Ca_16385	-1.10902	0.01595
				XLOC_024837	Ca_02079	-1.1088	0.008
				XLOC_009996	Ca_19060	-1.10543	0.0406
				XLOC_010937	Ca_07876	-1.10532	0.011
				XLOC_000508	Ca_00698	-1.10452	0.0068
				XLOC_024111	Ca_02031	-1.10392	0.01055
				XLOC_023799	Ca_11913	-1.10143	0.0298
				XLOC_020023	Ca_17440	-1.09966	0.02935
				XLOC_023795	Ca_11926	-1.09905	0.0098
				XLOC_002028	Ca_00574	-1.09876	0.0078
				XLOC_000522	Ca_07909	-1.09763	0.00575
				XLOC_006521	-	-1.09759	0.036
				XLOC_018754	-	-1.09711	0.00585
				XLOC_002543	Ca_07061	-1.09621	0.00685
				XLOC_014614	Ca_23359	-1.09519	0.03385
				XLOC_015906	Ca_04069	-1.09429	0.01115
				XLOC_001752	Ca_00009	-1.09175	0.00495
				XLOC_006794	Ca_08181	-1.08948	0.03985
				XLOC_001596	Ca_22534	-1.08786	0.0109
				XLOC_013520	Ca_04871	-1.08719	0.0055
				XLOC_016092	-	-1.08685	0.0257
				XLOC_004995	Ca_19144	-1.08635	0.0164
				XLOC_012952	Ca_21229	-1.08598	0.0314
				XLOC_015950	Ca_04164	-1.0858	0.03425
				XLOC_011628	Ca_05470	-1.08544	0.0093
				XLOC_014864	Ca_17661	-1.08466	0.01925
				XLOC_004637	Ca_16849	-1.08422	0.01845
				XLOC_028524	Ca_26028	-1.08382	0.0074
				XLOC_020374	Ca_20243	-1.08287	0.01635
				XLOC_015638	Ca_07578	-1.08252	0.04175
				XLOC_001520	Ca_13942	-1.08204	0.045
				XLOC_008299	Ca_07290	-1.08154	0.00975
				XLOC_005867	Ca_09799	-1.08046	0.02425
				XLOC_012457	Ca_18351	-1.08017	0.0153
				XLOC_015715	Ca_11383	-1.07884	0.00825
				XLOC_010219	Ca_14227	-1.0774	0.01845
				XLOC_009807	Ca_05497	-1.07739	0.0106
				XLOC_012737	-	-1.07697	0.03015
				XLOC_016300	Ca_10356	-1.07487	0.0141
				XLOC_020441	Ca_03320	-1.07449	0.017
				XLOC_022782	Ca_12312	-1.07447	0.01455
				XLOC_000735	Ca_02743	-1.07434	0.00775
				XLOC_007837	-	-1.0739	0.009
				XLOC_023794	Ca_11927	-1.07259	0.01095
				XLOC_008542	Ca_00783	-1.06855	0.02215
				XLOC_003427	-	-1.06815	0.04385
				XLOC_015314	Ca_01854	-1.06724	0.02375
				XLOC_017754	Ca_13840	-1.06534	0.00655
				XLOC_025576	Ca_17224	-1.06401	0.04145
				XLOC_018788	Ca_05167	-1.0598	0.0088
				XLOC_010335	Ca_14822	-1.05825	0.00955
				XLOC_014036	Ca_11399	-1.05798	0.0217
				XLOC_016226	Ca_13259	-1.0578	0.03195
				XLOC_019277	Ca_16684	-1.05719	0.0485
				XLOC_008218	Ca_08105	-1.05717	0.01475
				XLOC_021247	Ca_12345	-1.05702	0.0163
				XLOC_008492	Ca_20882	-1.05042	0.01665
				XLOC_015384	Ca_01709	-1.04889	0.0061
				XLOC_005686	Ca_10290	-1.04759	0.0181
				XLOC_009294	Ca_03661	-1.04747	0.0095
				XLOC_018368	Ca_05827	-1.04655	0.0121
				XLOC_001245	Ca_20634	-1.04558	0.00875
				XLOC_013932	Ca_07520	-1.04466	0.024
				XLOC_013414	Ca_16648	-1.04434	0.01945
				XLOC_007703	Ca_25319	-1.04382	0.0203
				XLOC_010310	Ca_22448	-1.04278	0.0073
				XLOC_020668	Ca_06803	-1.04095	0.01675
				XLOC_006737	Ca_08279	-1.03887	0.02265
				XLOC_020963	Ca_09342	-1.03797	0.0232
				XLOC_016568	Ca_09651	-1.03589	0.02185
				XLOC_020875	Ca_17303	-1.03429	0.01315
				XLOC_012194	Ca_13107	-1.03313	0.0197
				XLOC_005777	Ca_15274	-1.03241	0.0147
				XLOC_019949	-	-1.03225	0.0494
				XLOC_008230	Ca_07151	-1.03042	0.0353
				XLOC_014643	Ca_17081	-1.02906	0.01195
				XLOC_009190	Ca_03856	-1.02784	0.01275
				XLOC_001923	Ca_00363	-1.0266	0.02705
				XLOC_020825	Ca_15356	-1.0266	0.01875
				XLOC_001938	-	-1.02332	0.0239
				XLOC_007004	Ca_12260	-1.02037	0.0332
				XLOC_005653	Ca_12421	-1.01888	0.01425
				XLOC_005866	Ca_09798	-1.0188	0.0152
				XLOC_018461	Ca_16929	-1.01773	0.01955
				XLOC_009510	Ca_08471	-1.01581	0.04445
				XLOC_018326	Ca_05908	-1.01481	0.0388
				XLOC_029353	Ca_21186	-1.01204	0.03355
				XLOC_010036	Ca_14467	-1.01062	0.0148
				XLOC_000718	Ca_02774	-1.01018	0.01205
				XLOC_019696	Ca_13839	-1.01001	0.0098
				XLOC_024056	Ca_02141	-1.00814	0.0297
				XLOC_017140	-	-1.00808	0.03425
				XLOC_023990	Ca_02264	-1.00789	0.0179
				XLOC_007424	Ca_22946	-1.00768	0.0182
				XLOC_026763	Ca_20803	-1.00741	0.01495
				XLOC_011456	Ca_04518	-1.00215	0.03575
				XLOC_011434	Ca_04474	-1.00182	0.01555
				XLOC_009794	Ca_05518	-1.00061	0.0313
